# Supplementary material for: Phenylpropane biosynthesis and alkaloid metabolism pathways involved in resistance of Amorphophallus spp. against soft rot disease
Source: Front Plant Sci. 2024 Feb 20;15:1334996. doi: 10.3389/fpls.2024.1334996 (PMC10912172; doi:10.3389/fpls.2024.1334996)
Supplement: Supplementary file 5 [file Table_1.xlsx]

## Sheet: Sheet1
Table S1 Primers for qRT-PCR analysis
Gene ID	Primer name	primer sequence (5'to3')
C426494589.1	1-PAL-F	GAAGCACGTTGTGATGCAGG
	1-PAL-R	CGATGTAGGAGAACACGGGC
C427243820.1	2-CYP73A16-F	TCGAGTACAACTACGGCGAC
	2-CYP73A16-R	GTCCTTGAAGAGCTGGAGGC
scaffold65292.1	6-CCOAOMT1-F2	TGATCGAGCTGGTGAAGGTGG
	6-CCOAOMT1-R2	TCGCGGTAGTAGCGGACGTA
scaffold1148417.1	8-RBOH-F3	TCGACATGGTGGACAAGGAC
	8-RBOH-R3	CAGCAGCATCTCCAGGTTGT
scaffold62446.1	10-Actin-F	GGTCTACCATGTTCCCAGGC
	10-Actin-R	CGTCGTACTCTGCCTTGGTT
scaffold942056.2	15-CPK20-F	TCGGGCAACAGATTCCAGAC
	15-CPK20-R	GCTTTCCGCAAGTGGTCATC
