# Supplementary material for: Phenylpropane biosynthesis and alkaloid metabolism pathways involved in resistance of Amorphophallus spp. against soft rot disease
Source: Front Plant Sci. 2024 Feb 20;15:1334996. doi: 10.3389/fpls.2024.1334996 (PMC10912172; doi:10.3389/fpls.2024.1334996)
Supplement: Supplementary file 6 [file Table_2.xlsx]

## Sheet: Sheet1
Table S3 RNA-Seq data statistics of A. muelleri and A. konjac
Sample	Q20(%)	Q30(%)	GC(%)
KJ0-1	0.9767	0.9344	0.5223
KJ0-2	0.9792	0.939	0.499
KJ0-3	0.9824	0.947	0.5019
KJ24-1	0.9789	0.9388	0.5186
KJ24-2	0.9797	0.9414	0.5154
KJ24-3	0.98	0.9419	0.5194
KJ48-1	0.9793	0.9401	0.5252
KJ48-2	0.9793	0.9402	0.5245
KJ48-3	0.9815	0.9457	0.5237
MJ0-1	0.9794	0.9407	0.5141
MJ0-2	0.9798	0.9414	0.5095
MJ0-3	0.9776	0.9368	0.5144
MJ24-1	0.9773	0.9352	0.5189
MJ24-2	0.9811	0.9441	0.5155
MJ24-3	0.9795	0.9408	0.5184
MJ48-1	0.9799	0.9417	0.5233
MJ48-2	0.9802	0.9426	0.5194
MJ48-3	0.9758	0.9322	0.513
