# Supplementary material for: Phenylpropane biosynthesis and alkaloid metabolism pathways involved in resistance of Amorphophallus spp. against soft rot disease
Source: Front Plant Sci. 2024 Feb 20;15:1334996. doi: 10.3389/fpls.2024.1334996 (PMC10912172; doi:10.3389/fpls.2024.1334996)
Supplement: Supplementary file 7 [file Table_3.xlsx]

## Sheet: genes.expression
Table S3 Annotated information on differentially expressed genes (DEGs) in A. konjac and A. muelleri for heatmap at 0, 24 and 48 hpi
Gene id	Symbol	Gene name	KJ0-1	KJ0-2	KJ0-3	KJ24-1	KJ24-2	KJ24-4	KJ48-1	KJ48-2	KJ48-3	MJ0-1	MJ0-2	MJ0-3	MJ24-1	MJ24-2	MJ24-3	MJ48-1	MJ48-2	MJ48-3
C425121946.1	CAD	cinnamoyl alcohol dehydrogenase	3.91	6.06	15.92	1.82	0.98	3.02	2.28	3.2	3.19	29.44	30.83	37.09	0	1.82	2.9	6.12	12.99	2.03
C425604208.1	PER25	peroxidase	2.15	0	0.48	1546.2	363.27	683.27	1118.7	988.6	1288.79	10.53	3	6.13	2817.28	1522.73	2395.74	1463.91	563.65	2115.53
C426106985.1	RBOHB	respiratory burst oxidase homolog protein	2.19	2.96	1.96	74.12	58.74	68.58	69.42	126.95	110.89	10.69	5.33	0	181.68	59.37	36.23	49.24	9.68	68.08
C426477033.1	AS1	polyphenol oxidase	0.93	0	0	561.61	112.46	185.11	1256.99	871.11	1295.3	1.55	0.54	2.04	180.22	29.92	84.54	172.53	30.27	161.23
C426494589.1	PAL	phenylalanine ammonia-lyase	7.99	4.5	6.52	161.83	79.76	182.61	237.93	248.63	334.92	1.37	1.26	0.86	417.99	355.43	420.76	296.26	86.84	149.33
C426550835.1	PPO	polyphenol oxidase	0	0	0	24.13	10.06	17.2	17.56	15.21	20.02	10.48	9.7	0	49.62	39.39	36.28	46.49	12.33	25.45
C426566143.1	TOGT1	scopoletin glucosyltransferase	11.42	32.32	37.86	202.15	82.55	185.03	242.19	142.65	176.95	14.49	18.5	45.32	79.3	77.08	80.71	88.09	31.75	65.07
C426622369.1	4CL1	4-coumarate:coenzyme A ligase	15.38	6.25	2.26	101.06	116.75	91.22	216.59	299.91	345.71	4.27	4.39	4.78	141.27	30.48	32.83	34.17	13.39	27.21
C426679419.1	GT7	anthocyanin 3'-O-beta-glucosyltransferase-like	1.09	0.31	0	2.35	0.27	2.68	0.32	0	0.3	47.48	16.07	3.22	5.21	5.05	3.75	3.4	14.42	1.13
C426753517.1	CYP73A1	trans-cinnamate 4-monooxygenase	141.86	162.73	258.12	1497.32	550.54	758.65	1196.21	1024.08	1407.53	189.45	269.28	541.61	1272.37	419.9	797.34	650.9	366.69	581.75
C426794373.1	RBOHC	respiratory burst oxidase homolog protein	1.94	0.82	1.91	31.87	100.6	85.83	77.44	208.47	127.74	8.22	14.38	0	253.69	105.31	58.01	47.64	11.29	58.52
C426945261.1	PER25	peroxidase N1-like	0.51	0.86	1.71	970.36	228.1	443.4	1156.24	987.32	1284.88	0.48	0.88	0.6	358.32	55.14	106.48	37.52	19.07	98.36
C427072997.1	PER50	peroxidase	0	0	0	0	0	0	0	0	0.76	3.27	0	0	6.68	17.47	28.15	25.4	6.16	38.28
C427093455.1	CML38	calcium-binding protein	0	0.18	4.47	11.37	0.6	1.72	2.7	10.11	8.62	2.47	0.76	0	26.35	28.07	25.7	8	16.91	25.38
C427243820.1	CYP73A16	cinnamate-4-hydroxylase	137.05	115.31	106.59	683.14	490.08	431.11	612.08	826.19	824.2	31.74	100.43	11.64	543.55	195.21	209.5	206.73	97.81	222.34
C427287220.1	RBOHB	respiratory burst oxidase homolog protein B-like	0.38	0.14	0.85	30	2.14	6.83	86.96	58.13	29.94	0	1.53	0	109	0.93	28.25	39.3	2.78	126.48
C427298622.1	CSE	acylglycerol lipase	82.46	10.41	12.72	400.08	309.67	456.86	622.38	625.46	757.31	74.75	30.21	78.28	1139.72	564.41	616.67	491.87	300.2	263.26
C427301322.1	CPK19	calcium-dependent protein kinase 2-like	91.97	62.94	54.91	112.77	152.27	107.27	93.3	127.96	127.6	55.98	115.7	29.95	362.01	306.03	166.54	174.34	116.88	247.19
C427344540.1	CYP73A12	trans-cinnamate 4-monooxygenase	14.95	24.84	19.34	291.89	133.35	157.08	288.99	278.5	308.05	0	0.44	1.8	512.26	73.52	159.47	236.74	99.83	409.76
C427387718.1	CPK28	calcium-dependent protein kinase	31.45	17.21	9.75	33.72	112.57	75.44	37.75	65.37	36.18	17.46	21.37	0	152.13	158.73	87.44	49.34	23.86	99.46
MSTRG.38048	PER12	Peroxidase protein	0	0	0	7.22	4.68	2.88	2.04	1.27	3.18	8.78	1.02	0	147.73	64.18	44.9	295.75	64.58	243.08
MSTRG.42473	4CL2	4-coumarate--CoA ligase 2-like	23.09	13.19	8.13	172.58	135.95	175.16	379.99	433.67	528.7	36.82	7.76	20.94	574.69	143.62	220.68	144.11	64.49	155.51
scaffold1011039.1	BACOVA_02659	beta-glucosidase	18.57	25.94	23.15	12.09	19.38	12.07	14.96	9.25	8.27	56.56	96.97	72.56	31.09	13.53	15.43	19.7	24.76	20.29
scaffold1022487.1	Sb03g046810	cationic peroxidase SPC4	0	0	0.72	0	4.5	0	0	0	1.4	3.62	0	4.56	26.89	32.07	8.86	21.41	21.3	79.06
scaffold1086995.2	BGLU31	beta-glucosidase 31-like	142.81	483.24	560.84	489.8	261.97	488.57	466.59	403.6	451.56	7.03	10.85	7.79	26.71	59.86	43.38	22.45	14.8	28
scaffold1089350.1	CPK5	calcium-dependent protein kinase 5	40.76	37.88	48.4	390.46	398.54	279.93	413.66	408.73	430.41	181.51	104.18	68.8	651.85	441.49	402	478.75	309.29	673.41
scaffold1094790.1	RBOHF	respiratory burst oxidase protein	25.5	7.21	2.74	21.37	50.96	28.01	19.74	31.97	22.03	6.95	24.18	2.47	65.31	47.61	37.78	49.26	23.15	42.12
scaffold1135140.1	poxN1	peroxidase N1-like	0.24	0	0	4.88	0	0	1.21	4.47	2.1	0	0	0	333.68	218.76	168.34	15.31	42.14	118.08
scaffold1148417.1	RBOHB	respiratory burst oxidase homolog protein C-like	10.15	7.55	2.96	146.48	251.18	238.73	268.09	577.78	399.36	11.84	28.28	19.25	585.63	207.34	128.6	160.07	40	225.94
scaffold1241630.1	AAT	aspartate-prephenate aminotransferase-like	37.98	27.04	30.73	76.51	144.49	74.27	97.72	100.77	107.86	20.97	32.19	0.33	142.45	105.29	86.06	123.95	71.86	200.45
scaffold1255001.1	CYP719A13	(S)-canadine synthase-like	1.98	56.28	81.38	2699.16	1072.03	2422.14	4766.66	4400.23	5278.73	4.35	3.83	5.22	103.55	14.33	9.55	194.62	11.45	248.09
scaffold1300666.2	CPK4	calcium-dependent protein kinase	134.03	76.57	69.24	263.34	327.87	382.93	224.38	270.83	211.04	285.3	167.6	55.4	1141.8	1114.44	1025.73	808.03	480.65	788.55
scaffold1314822.1	CYP98A2	5-O-(4-coumaroyl)-D-quinate 3'-monooxygenase	42.43	9.65	8.31	400.86	238.64	301.96	532.94	514.58	548.83	33.22	24.13	39.36	1101.81	337.49	393.07	384.16	120.13	322.87
scaffold1317237.1	CYP73A16	trans-cinnamate 4-monooxygenase	13.46	16.64	11.05	134.46	101.86	101.56	147.93	241.34	183.31	0.31	1.14	0	140.14	18.93	24.61	48.61	12.35	101.89
scaffold1329023.1	co-2	polyphenol oxidase	0	0	0.35	119.45	50.88	81.53	349.81	319.67	443.95	1.17	0	0.74	107.1	21.43	31.33	50.01	9.65	94.38
scaffold1410077.1	Os01g0760600	aspartate aminotransferase	17.68	6.42	19.19	131.21	77.73	97.16	103.82	111.38	131.55	27.87	20.84	54.04	82.61	79.53	95.61	122.47	94.64	137.29
scaffold1468025.2	PER35	peroxidase protein	0	0	0.87	19.11	19.35	4.77	9.01	22.75	15.97	0	0	0	48.52	33.03	35.03	61.18	18.8	80.13
scaffold1470318.1	PER51	peroxidase 51-like protein	2.72	0.51	1.78	160.73	1.19	114.6	136.81	149.77	136.38	9.43	4.28	0	315.19	191.27	182.51	254.64	75.57	382.22
scaffold1475067.1	CBP	calcium-binding protein	99.61	140.38	175.8	796.74	539.47	562.76	622.49	572.13	627.38	304.33	134.05	142.03	753.18	454.57	526.76	811.55	568.74	671.87
scaffold1493505.1	poxN1	cationic peroxidase 2	0	0	0	0	0.48	0.59	1.66	0	0	21.44	0.83	1.13	162.57	445.35	498.67	398.31	176.66	301.8
scaffold170000.1	CYP73A1	trans-cinnamate 4-monooxygenase	97.45	81.4	95.67	656.12	305.55	326.78	553.2	500.04	697.65	66.64	156.99	176.89	785.22	283.42	421.24	350.28	220.92	372.19
scaffold175902.1	TYDC2	tyrosine/DOPA decarboxylase 2-like	27.45	0.12	0.81	829.01	268.32	346.03	566.03	767.45	718.39	1.76	2.7	1.47	250.83	136.19	79.39	123.57	42.18	111.6
scaffold230252.2	BGLU44	beta-glucosidase 44	241.16	229.08	293.93	421.88	628.77	1837.2	963.71	1908.27	927.61	495.65	744.65	696.92	762.49	2112.21	3114.43	1261.26	2799.31	607.07
scaffold249985.1	PAT	Aminotransferase	7.95	8.43	14.69	20.83	30	25.99	15.28	17.86	25.45	13.19	14.65	21.05	81.64	61.75	62.73	94.59	41.4	118.43
scaffold329485.1	maoI	primary-amine oxidase	27.47	26.13	12.77	10.3	52	27.9	20.83	42.2	29.95	81.73	65.82	8.23	27.16	22.42	9.22	13.94	21.64	12.47
scaffold448770.1	CPK2	calcium-dependent protein kinase 19	163.01	138.28	140.94	326.37	283.74	300.26	292.05	263.36	286.71	329.18	335.36	292.44	937.06	986.14	820.79	779.14	555.21	851.43
scaffold453506.1	CML7	calcium-binding protein 7	39.34	30.4	47.54	23.68	28.69	4.82	7.31	10.77	4.78	153.22	68.65	216.59	21.65	33.25	28.77	49.49	84.21	23.12
scaffold49847.1	CAM	calmodulin-1-like	5.31	25.4	35.72	242.5	78.78	164.22	264.01	322.85	347.93	306.79	69.26	253.81	793.14	569.28	713.8	838.2	610.65	534.2
scaffold65292.1	CCOAOMT1	caffeoyl-CoA O-methyltransferase	200.7	91.28	97.94	3537.76	2077.82	2300.72	2619.19	3011.78	2931.4	259.5	125.88	200.97	3811.35	2124.58	1936.99	1493.96	1077.67	1959.86
scaffold706765.1	AS1	polyphenol oxidase	0.72	0	0	378.14	116.43	163.25	920.9	811	1093.93	0.69	0.62	1.35	228.09	40.06	77.61	145.51	16.5	196.12
scaffold706765.2	AS1	polyphenol oxidase	0.3	1.5	1.74	565.87	94.04	203.56	1260.01	893.17	1316	0.41	0.64	0.81	337.63	56.99	134.46	241.49	45.41	318.84
scaffold750062.1	PER12	peroxidase 12	0	0	1.57	47.12	72.5	42.92	35.49	40.91	37.36	45.66	12.7	236.11	1655.97	609.67	639.09	3283.75	696.68	2355
scaffold912257.1	AAT	spartate-prephenate aminotransferase	47.04	35.96	36.2	178.16	109.61	94.57	127.65	158.45	164.11	32.89	40.19	11.27	180.53	96.95	76.38	39.66	38.71	128.65
scaffold942056.2	CPK20	calcium-dependent protein kinase 20	27.35	19.53	16.64	813.6	772.14	850.6	876.87	1152.65	1087.86	169.08	103.43	52.72	1843.53	993.81	716.23	1004.16	638.1	987.8
scaffold943450.1	maoI	primary-amine oxidase	59.68	53.92	38.44	61.02	88.38	102.21	69.06	76.21	67.95	614.27	201.18	255.59	98.33	105.74	61.08	64.68	140.45	73.61
scaffold975913.1	RBOHB	respiratory burst oxidase homolog protein B	0.21	0.46	2.54	4.08	2.48	1.27	11.78	23.82	7.84	0	1.08	0	26.6	1.53	4.06	9.02	0.91	37.61
