# Supplementary material for: Phenylpropane biosynthesis and alkaloid metabolism pathways involved in resistance of Amorphophallus spp. against soft rot disease
Source: Front Plant Sci. 2024 Feb 20;15:1334996. doi: 10.3389/fpls.2024.1334996 (PMC10912172; doi:10.3389/fpls.2024.1334996)
Supplement: Supplementary file 8 [file Table_4.xlsx]

## Sheet: Sheet1
Differentially accumulated metabolites (DAMs) in A. konjac in the comparison of KJ0 vs. KJ24
index	KJ0-1	KJ0-2	KJ0-3	KJ24-1	KJ24-2	KJ24-3	control_mean	case_mean	log2_FC(case_mean/control_mean)	Pvalue	fdr	vip	SuperClass	Class
M104T287_2_POS	4.05223e+10	4.67265e+10	4.52502e+10	2.795e+10	2.41662e+10	2.62868e+10	4.41663e+10	2.61343e+10	-0.757002	0.00114153	0.0247923	15.2859	Organic acids and derivatives	Organic sulfuric acids and derivatives
M314T220_2_POS	2.49512e+10	2.91299e+10	3.16419e+10	1.53536e+10	1.22027e+10	1.42853e+10	2.85743e+10	1.39472e+10	-1.03474	0.00247941	0.0365449	13.7131	Alkaloids and derivatives	Morphinans
M579T234_2_POS	1.06594e+10	1.2085e+10	1.72274e+10	1.10498e+08	1.03265e+09	3.07842e+08	1.33239e+10	4.83664e+08	-4.78387	0.00310612	0.0406648	12.8427	--	--
M565T263_3_POS	6.91947e+09	1.09461e+10	1.63302e+10	1.6465e+07	9.3189e+07	3.50222e+07	1.13986e+10	4.82254e+07	-7.88484	0.0141048	0.0823878	11.7349	Phenylpropanoids and polyketides	Flavonoids
M520T214_3_POS	1.4287e+10	7.2189e+09	9.23182e+09	1.96245e+09	2.19346e+09	2.94338e+09	1.02459e+10	2.36643e+09	-2.11426	0.0206333	0.09979	9.68336	--	--
M136T181_2_POS	1.27002e+10	8.91679e+09	1.0494e+10	3.34191e+09	3.24631e+09	4.46591e+09	1.07037e+10	3.68471e+09	-1.53849	0.00382391	0.0449505	9.46783	Organoheterocyclic compounds	Imidazopyrimidines
M522T213_2_POS	3.90228e+09	4.14293e+09	4.86328e+09	4.73347e+08	4.10084e+08	6.909e+08	4.30283e+09	5.24777e+08	-3.03551	0.000231759	0.0132183	7.07014	Lipids and lipid-like molecules	Glycerophospholipids
M365T390_3_POS	2.79628e+09	4.8187e+09	4.64525e+09	8.77012e+07	1.3991e+08	3.4249e+08	4.08674e+09	1.90034e+08	-4.42662	0.00393467	0.045334	7.00224	Organic oxygen compounds	Organooxygen compounds
M138T310_3_POS	3.81668e+09	9.13003e+09	6.84662e+09	2.11865e+09	1.84189e+09	2.3924e+09	6.59777e+09	2.11765e+09	-1.63952	0.0442993	0.147557	6.93656	Alkaloids and derivatives	-
M104T393_3_POS	4.47974e+09	3.67859e+09	4.68118e+09	5.69142e+08	7.38932e+08	1.36159e+09	4.27984e+09	8.89888e+08	-2.26586	0.000960556	0.0225116	6.65816	Organic acids and derivatives	Carboxylic acids and derivatives
M613T39_POS	4.79408e+09	4.88486e+09	3.32521e+09	1.31923e+09	9.42026e+08	1.08958e+09	4.33472e+09	1.11695e+09	-1.95638	0.00339841	0.0421069	6.36834	--	--
M146T378_1_POS	3.70914e+09	3.23848e+09	5.85548e+09	1.10572e+09	6.33766e+08	1.28727e+09	4.2677e+09	1.00892e+09	-2.08065	0.0170647	0.0912202	6.28783	Organic acids and derivatives	Carboxylic acids and derivatives
M328T207_POS	3.06447e+09	3.41095e+09	5.33052e+09	9.79574e+08	1.57979e+09	1.01807e+09	3.93532e+09	1.19248e+09	-1.72252	0.0199046	0.0978088	5.72595	--	--
M759T171_1_POS	5.74763e+09	3.92605e+09	4.03018e+09	2.20196e+09	2.58771e+09	2.11615e+09	4.56795e+09	2.30194e+09	-0.988696	0.0203662	0.0989173	5.18827	--	--
M447T175_POS	1.34921e+09	1.90045e+09	1.99265e+09	2.66805e+07	1.20241e+08	6.54794e+07	1.74744e+09	7.08002e+07	-4.62534	0.00116608	0.0250765	4.66102	Phenylpropanoids and polyketides	Coumarins and derivatives
M87T393_POS	1.79244e+09	1.47201e+09	1.88659e+09	2.26081e+08	2.89547e+08	5.37183e+08	1.71701e+09	3.50937e+08	-2.29062	0.000968367	0.0225231	4.227	Organic oxygen compounds	Organooxygen compounds
M335T39_POS	1.9386e+09	1.7905e+09	1.31464e+09	5.57044e+08	3.73485e+08	4.39245e+08	1.68125e+09	4.56591e+08	-1.88056	0.00332792	0.0415914	3.93789	--	--
M428T31_POS	6.48166e+08	1.52293e+09	1.89354e+09	7.06686e+07	2.04425e+08	1.33535e+08	1.35488e+09	1.36209e+08	-3.31426	0.0304166	0.121737	3.72707	Lipids and lipid-like molecules	Fatty Acyls
M154T66_POS	2.40038e+07	5.38775e+07	2.05589e+07	1.45777e+09	6.78832e+08	1.21123e+09	3.28134e+07	1.11594e+09	5.08784	0.00925804	0.0664371	3.64032	Organic acids and derivatives	Carboxylic acids and derivatives
M783T168_1_POS	2.40366e+09	1.83792e+09	2.00663e+09	9.59489e+08	1.14474e+09	1.10306e+09	2.08274e+09	1.06909e+09	-0.96209	0.00458631	0.0478245	3.58646	Lipids and lipid-like molecules	Glycerophospholipids
M184T213_POS	9.67419e+08	1.5026e+09	9.52894e+08	1.53804e+08	1.87005e+08	2.01307e+08	1.14097e+09	1.80706e+08	-2.65855	0.00611449	0.0548345	3.43186	Lipids and lipid-like molecules	Glycerophospholipids
M621T211_POS	6.17702e+08	1.03774e+09	1.26105e+09	5.4094e+07	742826	7.17584e+07	9.72165e+08	4.21984e+07	-4.52594	0.00804484	0.0620777	3.39356	--	--
M591T192_POS	9.00052e+08	1.08027e+09	1.06514e+09	1.48911e+08	1.76217e+08	2.37762e+08	1.01515e+09	1.8763e+08	-2.43573	0.000199064	0.0125544	3.29857	Lipids and lipid-like molecules	Glycerolipids
M311T181_2_POS	8.30178e+08	8.52845e+08	7.37571e+08	8.68648e+06	3.34651e+07	7.44338e+07	8.06865e+08	3.88618e+07	-4.3759	4.39416e-05	0.00758455	3.18638	Lipids and lipid-like molecules	Steroids and steroid derivatives
M124T348_POS	8.44301e+08	7.44414e+08	7.73227e+08	1.43227e+08	1.08235e+08	1.96422e+08	7.87314e+08	1.49295e+08	-2.39878	8.3571e-05	0.00911224	2.91045	Organic acids and derivatives	Carboxylic acids and derivatives
M282T34_POS	8.57876e+08	8.34304e+08	9.46127e+08	1.46445e+09	1.22942e+09	1.96127e+09	8.79436e+08	1.55171e+09	0.819212	0.036993	0.135099	2.75787	Lipids and lipid-like molecules	Fatty Acyls
M203T322_2_POS	9.60392e+08	6.64487e+08	7.15815e+08	3.84277e+08	6.41406e+07	1.24597e+08	7.80231e+08	1.91005e+08	-2.03029	0.0117402	0.0756423	2.69927	Benzenoids	Benzene and substituted derivatives
M573T192_POS	5.29243e+08	6.35999e+08	6.1013e+08	1.13718e+08	1.14924e+08	1.49184e+08	5.91791e+08	1.25942e+08	-2.23233	0.000168019	0.0116155	2.47577	--	--
M337T366_POS	4.29682e+08	4.34e+08	7.13925e+08	3.60515e+07	2.64261e+07	5.76401e+07	5.25869e+08	4.00392e+07	-3.71522	0.00678321	0.0569668	2.47446	Phenylpropanoids and polyketides	Isoflavonoids
M313T191_POS	6.41947e+08	7.33847e+08	7.4046e+08	2.35286e+08	2.28936e+08	2.8625e+08	7.05418e+08	2.50157e+08	-1.49564	0.000240276	0.0133557	2.44631	--	--
M595T38_POS	6.39046e+08	6.8887e+08	4.74454e+08	1.81173e+08	1.31735e+08	1.49919e+08	6.0079e+08	1.54276e+08	-1.96135	0.00254323	0.036905	2.37953	--	--
M313T194_POS	1.90649e+08	5.36491e+08	4.74086e+08	1.43134e+06	6.28361e+06	840514	4.00408e+08	2.85182e+06	-7.13344	0.0202019	0.0988839	2.15162	Phenylpropanoids and polyketides	Coumarins and derivatives
M381T390_POS	5.69203e+08	3.75048e+08	3.1748e+08	1.68095e+07	3.81503e+07	9.13555e+07	4.20577e+08	4.87718e+07	-3.10825	0.00939117	0.0670257	2.13499	Organoheterocyclic compounds	Azobenzenes
M293T349_2_POS	2.99838e+08	3.03004e+08	5.15662e+08	2.15753e+07	2.19178e+07	2.38061e+07	3.72835e+08	2.24331e+07	-4.05484	0.00800932	0.0619074	2.09615	--	--
M258T407_2_POS	5.83017e+08	7.58859e+08	4.21558e+08	1.74909e+08	1.83826e+07	3.74291e+08	5.87811e+08	1.89194e+08	-1.63549	0.0482153	0.154265	2.05045	Lipids and lipid-like molecules	Glycerophospholipids
M357T542_2_POS	3.9561e+08	4.19706e+08	3.70886e+08	1.0004e+08	7.6064e+07	1.01101e+08	3.95401e+08	9.2402e+07	-2.09732	4.92088e-05	0.00787221	2.00226	--	--
M478T220_POS	4.34602e+08	4.81012e+08	4.9687e+08	1.24711e+08	1.5853e+08	2.71009e+08	4.70828e+08	1.8475e+08	-1.34963	0.00398048	0.0454052	1.89372	--	--
M229T325_2_POS	2.08197e+08	2.45684e+08	5.6448e+08	2.63785e+07	1.64412e+07	1.87466e+07	3.39454e+08	2.05221e+07	-4.04797	0.0477987	0.153457	1.88478	Organic acids and derivatives	Carboxylic acids and derivatives
M372T209_1_POS	2.52096e+08	2.93068e+08	3.3847e+08	2.63499e+07	3.64633e+07	3.8636e+07	2.94545e+08	3.38164e+07	-3.12269	0.00049485	0.0173058	1.85082	--	--
M188T359_POS	1.10834e+08	3.59608e+08	3.80807e+08	1.41726e+07	1.59786e+07	2.1797e+07	2.8375e+08	1.73161e+07	-4.03443	0.0371883	0.135514	1.72096	Lipids and lipid-like molecules	Fatty Acyls
M285T155_POS	1.57169e+08	2.10492e+08	4.04764e+08	3.04418e+06	3.07556e+06	1.25338e+07	2.57475e+08	6.21783e+06	-5.37188	0.0289258	0.11868	1.7093	Phenylpropanoids and polyketides	Isoflavonoids
M298T96_POS	3.0668e+08	1.72156e+08	1.54091e+08	4.87559e+08	3.42331e+08	5.546e+08	2.10976e+08	4.61497e+08	1.12924	0.0338258	0.128617	1.6831	Nucleosides, nucleotides, and analogues	5'-deoxyribonucleosides
M454T227_POS	3.8639e+08	3.36323e+08	5.03841e+08	2.08044e+08	1.16021e+08	2.29947e+08	4.08851e+08	1.84671e+08	-1.14662	0.0209433	0.100256	1.63754	Lipids and lipid-like molecules	Glycerophospholipids
M337T219_POS	2.90191e+08	3.15589e+08	3.04292e+08	9.96403e+07	1.12044e+08	1.08811e+08	3.03357e+08	1.06832e+08	-1.50567	1.82617e-05	0.00691398	1.61488	Lipids and lipid-like molecules	Fatty Acyls
M576T38_POS	1.0436e+09	7.87325e+08	9.82506e+08	1.14803e+09	1.13726e+09	1.24271e+09	9.37809e+08	1.176e+09	0.326522	0.0474478	0.152704	1.59549	--	--
M231T228_POS	2.37984e+08	1.55298e+08	2.43648e+08	2.12283e+07	2.95163e+07	2.34706e+07	2.1231e+08	2.47384e+07	-3.10135	0.00281736	0.0389854	1.55931	Organic acids and derivatives	Carboxylic acids and derivatives
M643T177_POS	2.5857e+08	2.86705e+08	1.7094e+08	2.00882e+07	2.20911e+07	7.65281e+07	2.38738e+08	3.95691e+07	-2.59298	0.00724333	0.0579378	1.55747	--	--
M206T94_POS	9.08989e+07	2.72888e+08	3.32729e+08	1.46305e+07	2.08817e+07	1.1835e+07	2.32172e+08	1.57824e+07	-3.8788	0.040993	0.142288	1.54785	--	--
M337T194_POS	9.63238e+07	2.80377e+08	2.64395e+08	8.4355e+06	2.95577e+06	7.35005e+06	2.13699e+08	6.24711e+06	-5.09625	0.0243938	0.107961	1.54505	Organic oxygen compounds	Organooxygen compounds
M171T322_POS	1.46514e+08	1.47266e+08	3.44648e+08	1.18956e+07	1.22426e+07	1.32435e+07	2.12809e+08	1.24606e+07	-4.09412	0.0384311	0.137728	1.51174	Organic acids and derivatives	Keto acids and derivatives
M116T423_POS	1.98621e+08	1.97705e+08	1.6979e+08	1.41668e+07	1.77404e+07	2.80418e+07	1.88705e+08	1.9983e+07	-3.23929	8.24047e-05	0.00911224	1.49204	Organic acids and derivatives	Carboxylic acids and derivatives
M441T225_POS	3.60882e+08	3.53866e+08	3.2169e+08	1.23583e+08	2.26987e+08	1.5338e+08	3.45479e+08	1.67983e+08	-1.04028	0.00578266	0.0534643	1.48479	Organoheterocyclic compounds	Indoles and derivatives
M112T265_POS	3.30862e+08	1.78809e+08	2.62969e+08	5.45019e+07	7.38272e+07	1.02694e+08	2.57547e+08	7.70078e+07	-1.74176	0.0173684	0.0918702	1.47499	Organoheterocyclic compounds	Diazines
M132T292_1_POS	1.7418e+08	1.67273e+08	2.64983e+08	4.43027e+07	4.26381e+07	3.59914e+07	2.02145e+08	4.09774e+07	-2.30249	0.00696907	0.0577148	1.42662	--	--
M319T281_POS	6.86357e+07	2.186e+08	2.71051e+08	6.99348e+06	2.42864e+06	3.2751e+06	1.86096e+08	4.23241e+06	-5.45842	0.0400308	0.141075	1.42127	Organic acids and derivatives	Carboxylic acids and derivatives
M527T449_2_POS	6.87377e+07	2.46183e+08	2.57499e+08	1.09172e+07	5.68923e+06	1.10081e+07	1.90806e+08	9.20486e+06	-4.37357	0.0411477	0.142417	1.41334	Organic oxygen compounds	Organooxygen compounds
M785T151_POS	2.40228e+08	1.62441e+08	2.05224e+08	3.61273e+07	4.54146e+07	7.18948e+07	2.02631e+08	5.11456e+07	-1.98617	0.00369796	0.0443417	1.3911	--	--
M143T200_2_POS	1.39633e+08	1.77947e+08	1.51755e+08	9.85933e+06	2.15349e+07	1.79111e+07	1.56445e+08	1.64351e+07	-3.2508	0.000290908	0.0140647	1.35282	--	--
M341T189_POS	1.33476e+08	1.74971e+08	1.97942e+08	2.53556e+07	2.42515e+07	4.09693e+07	1.68796e+08	3.01921e+07	-2.48304	0.00211858	0.0334453	1.33412	Lipids and lipid-like molecules	Glycerolipids
M423T35_POS	1.63216e+08	1.31118e+08	1.74238e+08	1.06211e+07	2.88563e+07	2.70383e+07	1.56191e+08	2.21719e+07	-2.81651	0.000697891	0.0196912	1.32811	Lipids and lipid-like molecules	Steroids and steroid derivatives
M269T220_POS	2.68361e+08	3.28081e+08	3.46573e+08	1.77957e+08	1.96078e+08	1.5177e+08	3.14338e+08	1.75268e+08	-0.842753	0.00663225	0.0563483	1.31814	--	--
M163T127_POS	1.14765e+08	1.85478e+08	1.78839e+08	3.42664e+07	1.75223e+07	1.66557e+07	1.59694e+08	2.28148e+07	-2.80727	0.00417016	0.0458465	1.31398	--	--
M215T347_POS	1.46557e+08	1.62531e+08	1.11156e+08	5.28874e+06	1.09545e+07	1.0247e+07	1.40081e+08	8.83007e+06	-3.98769	0.00101032	0.0230093	1.30003	Alkaloids and derivatives	Harmala alkaloids
M285T129_POS	9.78201e+07	1.74091e+08	1.88977e+08	1.34646e+07	2.14152e+07	1.43764e+07	1.5363e+08	1.64187e+07	-3.22604	0.00839576	0.0635887	1.29981	--	--
M123T380_POS	1.63324e+08	8.63003e+07	6.37167e+07	2.13899e+08	2.7779e+08	2.22331e+08	1.04447e+08	2.38007e+08	1.18823	0.0210353	0.100342	1.25311	Organic oxygen compounds	Organooxygen compounds
M105T37_POS	1.88242e+08	1.4788e+08	1.24572e+08	2.63633e+08	3.43238e+08	2.35071e+08	1.53565e+08	2.80647e+08	0.869913	0.0271618	0.114275	1.20902	Benzenoids	Benzene and substituted derivatives
M176T53_POS	1.17517e+08	1.75559e+08	2.20472e+08	3.88633e+07	6.94533e+07	4.5365e+07	1.71182e+08	5.12272e+07	-1.74055	0.0184235	0.0939	1.19371	Phenylpropanoids and polyketides	Coumarins and derivatives
M361T446_4_POS	9.30378e+07	9.06403e+07	1.40104e+08	263907	300556	728347	1.07927e+08	430937	-7.96837	0.00261798	0.037574	1.17914	--	--
M266T423_POS	1.63905e+08	1.21245e+08	9.05743e+07	1.16623e+07	1.53419e+07	1.96542e+07	1.25242e+08	1.55528e+07	-3.00947	0.00684552	0.0571244	1.16623	Benzenoids	Phenol ethers
M353T366_2_POS	1.61594e+08	7.64589e+07	1.25541e+08	9.46676e+06	7.72269e+06	1.81568e+07	1.21198e+08	1.17821e+07	-3.3627	0.0117154	0.0756423	1.16275	--	--
M283T194_POS	5.35241e+07	1.77281e+08	1.35292e+08	2.09858e+06	1.23915e+06	3.17858e+06	1.22033e+08	2.1721e+06	-5.81203	0.0299808	0.1206	1.16003	Benzenoids	Benzene and substituted derivatives
M274T352_POS	1.17234e+08	1.97233e+08	7.42709e+07	5.05398e+06	3.17305e+06	1.81945e+07	1.29579e+08	8.80717e+06	-3.87901	0.029279	0.119076	1.1578	--	--
M789T168_POS	1.83884e+08	1.51046e+08	1.14229e+08	3.26591e+07	3.71177e+07	5.59823e+07	1.4972e+08	4.19197e+07	-1.83656	0.00723608	0.0579378	1.15205	--	--
M330T226_POS	1.11653e+08	1.62889e+08	1.74309e+08	4.60587e+07	4.41257e+07	5.14375e+07	1.49617e+08	4.72073e+07	-1.66419	0.00616346	0.0548345	1.12952	Alkaloids and derivatives	Morphinans
M741T173_POS	2.09177e+08	1.11183e+08	1.09542e+08	2.93635e+08	2.75673e+08	2.15145e+08	1.43301e+08	2.61484e+08	0.867678	0.0436571	0.146687	1.12904	Lipids and lipid-like molecules	Glycerophospholipids
M178T184_POS	1.80772e+08	1.63743e+08	2.16718e+08	7.64923e+07	5.49317e+07	1.17073e+08	1.87077e+08	8.28324e+07	-1.17537	0.0122062	0.0770046	1.12813	--	--
M267T327_POS	8.09445e+07	1.75112e+08	2.05036e+08	4.24699e+07	2.92309e+07	4.87911e+07	1.53697e+08	4.0164e+07	-1.93612	0.0398957	0.140837	1.12212	--	--
M327T175_POS	1.01804e+08	1.18711e+08	1.54705e+08	3.90622e+07	3.89926e+07	2.52011e+06	1.25073e+08	2.68583e+07	-2.21933	0.00768248	0.0604914	1.11098	Organic acids and derivatives	Organic phosphoric acids and derivatives
M787T149_POS	1.91561e+08	1.28e+08	1.2158e+08	2.42561e+07	5.78736e+07	5.49279e+07	1.47047e+08	4.56859e+07	-1.68646	0.0149817	0.0850624	1.10184	--	--
M319T365_2_POS	1.21441e+08	6.74836e+07	1.64812e+08	2.11984e+07	2.20704e+07	2.87936e+07	1.17912e+08	2.40208e+07	-2.29536	0.0292924	0.119076	1.05073	--	--
M397T180_3_POS	633101	1.81221e+07	2.30232e+06	6.23444e+07	1.00845e+08	1.16442e+08	7.01917e+06	9.32105e+07	3.73112	0.00715195	0.0579378	1.04506	Lignans, neolignans and related compounds	Lignan lactones
M223T49_POS	4.77082e+07	4.24766e+07	2.57314e+07	1.39722e+08	1.31454e+08	1.00579e+08	3.86387e+07	1.23918e+08	1.68127	0.00332908	0.0415914	1.03906	Phenylpropanoids and polyketides	Coumarins and derivatives
M793T102_POS	1.21402e+08	9.84214e+07	1.33898e+08	2.57387e+08	2.10493e+08	1.71446e+08	1.17907e+08	2.13108e+08	0.853936	0.0241141	0.107415	1.03684	--	--
M208T58_POS	1.44383e+08	7.84596e+07	6.71818e+07	1.25742e+06	1.01128e+07	1.32494e+07	9.66748e+07	8.20652e+06	-3.5583	0.0220725	0.102957	1.01836	--	--
M181T35_POS	7.45551e+07	9.50832e+07	1.07768e+08	1.18519e+07	1.39045e+07	1.77406e+07	9.24688e+07	1.4499e+07	-2.67301	0.00136724	0.0273407	1.00496	--	--
M491T34_POS	7.71798e+07	9.76402e+07	1.05035e+08	1.71641e+07	1.09097e+07	2.00711e+07	9.32849e+07	1.60483e+07	-2.53922	0.000912373	0.0223168	1.00285	--	--
M563T293_2_NEG	1.43902e+10	2.771e+10	3.76717e+10	1.91261e+08	3.69595e+08	5.89072e+08	2.65907e+10	3.83309e+08	-6.11627	0.0177594	0.0911399	14.3252	Phenylpropanoids and polyketides	Flavonoids
M577T234_4_NEG	1.53346e+10	2.38822e+10	3.66056e+10	1.87911e+08	1.85741e+09	5.55064e+08	2.52742e+10	8.66796e+08	-4.86583	0.0170114	0.0890032	13.8944	Phenylpropanoids and polyketides	Flavonoids
M431T191_1_NEG	9.05066e+09	2.42255e+10	3.13876e+10	1.92334e+08	6.64275e+08	5.65162e+08	2.15546e+10	4.73924e+08	-5.50719	0.0328828	0.126262	12.5185	Lipids and lipid-like molecules	Fatty Acyls
M355T371_NEG	6.65625e+09	5.13529e+09	5.28509e+09	5.73241e+07	4.63499e+07	1.00618e+08	5.69221e+09	6.80973e+07	-6.38525	0.000314058	0.0169484	6.97242	--	--
M173T143_NEG	3.96308e+09	4.91127e+09	6.45934e+09	4.08543e+08	5.58479e+08	1.06666e+08	5.11123e+09	3.57896e+08	-3.83606	0.00301289	0.0395321	6.32108	Organoheterocyclic compounds	Lactones
M209T373_NEG	2.09926e+09	2.03968e+09	2.14929e+09	3.62196e+07	3.28862e+07	3.78747e+07	2.09608e+09	3.56601e+07	-5.87724	3.36264e-07	0.00070237	4.24505	Organic oxygen compounds	Organooxygen compounds
M815T37_2_NEG	6.46219e+08	2.45387e+09	2.63244e+09	4.06353e+07	6.78624e+06	7.42222e+07	1.91084e+09	4.05479e+07	-5.55844	0.0421073	0.145452	3.65907	Lipids and lipid-like molecules	Prenol lipids
M143T191_NEG	1.42258e+09	2.41508e+09	2.17485e+09	4.35877e+08	5.19747e+08	5.01748e+08	2.00417e+09	4.85791e+08	-2.0446	0.00717714	0.0579352	3.48443	--	--
M149T322_1_NEG	1.40445e+09	1.46675e+09	2.05277e+09	2.43634e+08	1.85305e+08	3.08944e+08	1.64132e+09	2.45961e+08	-2.73836	0.00264299	0.037496	3.44654	Phenylpropanoids and polyketides	Cinnamyl alcohols
M163T350_NEG	5.89823e+08	1.79859e+09	2.22878e+09	4.52637e+06	6.34834e+06	3.57314e+06	1.53906e+09	4.81595e+06	-8.32002	0.0352773	0.131142	3.35987	--	--
M191T372_NEG	1.87086e+09	1.41765e+09	6.32499e+08	3.13468e+07	3.01883e+07	6.07224e+07	1.307e+09	4.07525e+07	-5.00323	0.0249163	0.109095	3.0663	Organic oxygen compounds	Organooxygen compounds
M842T62_NEG	1.60285e+09	9.03609e+08	1.11039e+09	6.66076e+07	1.15793e+08	1.35859e+08	1.20561e+09	1.06086e+08	-3.50646	0.00618774	0.0542742	3.0221	--	--
M203T445_3_NEG	1.15091e+09	1.06318e+09	1.41479e+09	1.51091e+08	1.30432e+08	3.5464e+08	1.20963e+09	2.12054e+08	-2.51205	0.00144502	0.0297468	2.93544	--	--
M593T369_NEG	4.78763e+08	1.0377e+09	1.28758e+09	3.22958e+06	7.43457e+06	9.14972e+06	9.3468e+08	6.60462e+06	-7.14485	0.0178193	0.0912731	2.68729	Phenylpropanoids and polyketides	Flavonoids
M715T174_1_NEG	2.38211e+08	8.07714e+07	9.30764e+07	1.1294e+09	1.05509e+09	7.67456e+08	1.37353e+08	9.8398e+08	2.84074	0.00222266	0.0350909	2.67519	--	--
M195T404_NEG	8.44931e+08	1.12984e+09	1.26118e+09	2.59276e+08	3.55327e+08	4.95632e+08	1.07865e+09	3.70078e+08	-1.54333	0.00730688	0.0583626	2.40921	Organic acids and derivatives	Hydroxy acids and derivatives
M613T233_NEG	5.07661e+08	8.21737e+08	9.86838e+08	1.58359e+07	1.59167e+08	5.00786e+07	7.72079e+08	7.50273e+07	-3.36326	0.00903168	0.0654468	2.37106	Phenylpropanoids and polyketides	Flavonoids
M555T186_NEG	6.53298e+08	4.66144e+08	8.94735e+08	1.62812e+07	4.15937e+07	6.78139e+07	6.71392e+08	4.18963e+07	-4.00226	0.00729088	0.0583271	2.2982	Organoheterocyclic compounds	Benzopyrans
M153T25_NEG	3.02877e+07	1.28561e+07	8.18003e+06	5.78368e+08	5.36476e+08	7.84337e+08	1.71079e+07	6.3306e+08	5.20961	0.00131736	0.0283999	2.27256	Benzenoids	Benzene and substituted derivatives
M413T293_NEG	3.34264e+08	6.5999e+08	9.20232e+08	2.74087e+06	7.43216e+06	1.23409e+07	6.38162e+08	7.50465e+06	-6.40999	0.0204734	0.0987434	2.21312	--	--
M593T314_NEG	2.66604e+08	7.95126e+08	7.82797e+08	2.07721e+06	2.9196e+06	1.47379e+07	6.14842e+08	6.57823e+06	-6.54637	0.0250844	0.109126	2.13313	Phenylpropanoids and polyketides	Flavonoids
M476T219_1_NEG	5.54856e+08	6.82722e+08	7.26036e+08	1.40743e+08	1.85975e+08	1.63834e+08	6.54538e+08	1.63518e+08	-2.00103	0.000755866	0.0234613	2.04712	Lipids and lipid-like molecules	Glycerophospholipids
M451T273_2_NEG	5.23375e+08	8.06961e+08	3.47225e+08	8.47436e+06	1.42368e+07	2.46032e+07	5.59187e+08	1.57715e+07	-5.14794	0.0154077	0.0853545	2.01961	Phenylpropanoids and polyketides	Isoflavonoids
M147T372_NEG	4.52665e+08	4.92535e+08	3.9488e+08	4.62165e+07	4.03028e+07	1.08735e+08	4.46693e+08	6.50847e+07	-2.77889	0.000439501	0.0191808	1.80247	--	--
M748T37_NEG	2.60585e+08	6.17904e+08	6.55639e+08	9.22557e+07	7.8805e+07	1.08028e+08	5.11376e+08	9.30296e+07	-2.45862	0.0294819	0.119047	1.76228	--	--
M242T116_NEG	5.29953e+08	2.36151e+08	4.82832e+08	4.43986e+07	5.57692e+07	6.29814e+07	4.16312e+08	5.43831e+07	-2.93644	0.0165966	0.088034	1.71332	--	--
M245T180_1_NEG	3.38613e+08	2.73775e+08	3.61966e+08	394113	5.42099e+06	1.04942e+07	3.24785e+08	5.43642e+06	-5.90068	0.000273552	0.0163182	1.67047	--	--
M129T57_NEG	2.43928e+08	4.71511e+08	6.58425e+08	4.99506e+07	2.81004e+07	1.67898e+08	4.57954e+08	8.19829e+07	-2.48181	0.0419897	0.145233	1.66551	Organic acids and derivatives	Keto acids and derivatives
M312T219_NEG	3.61893e+08	4.29746e+08	4.61441e+08	1.40604e+08	1.27518e+08	1.41915e+08	4.17693e+08	1.36679e+08	-1.61165	0.000697773	0.0224385	1.55047	Organic acids and derivatives	Carboxylic acids and derivatives
M111T195_2_NEG	3.24377e+08	5.82571e+08	2.64396e+08	4.01126e+07	3.29481e+07	1.25089e+08	3.90448e+08	6.60499e+07	-2.5635	0.0335197	0.127827	1.51389	Organoheterocyclic compounds	Furans
M241T425_1_NEG	2.629e+08	4.01261e+08	3.40645e+08	7.64311e+07	5.73361e+07	7.69918e+07	3.34935e+08	7.0253e+07	-2.25325	0.00284821	0.038682	1.47429	Organic oxygen compounds	Organooxygen compounds
M201T289_NEG	2.23609e+08	2.32155e+08	3.6523e+08	5.16128e+07	2.8557e+07	2.83883e+07	2.73665e+08	3.6186e+07	-2.91891	0.0069448	0.0569487	1.40374	Organic acids and derivatives	Carboxylic acids and derivatives
M99T109_NEG	2.54424e+08	4.59003e+08	5.09689e+08	1.35925e+08	1.13345e+08	1.83416e+08	4.07705e+08	1.44229e+08	-1.49917	0.030951	0.122663	1.40235	Lipids and lipid-like molecules	Fatty Acyls
M119T349_NEG	9.81497e+07	3.10012e+08	3.76175e+08	6.73992e+06	7.40021e+06	6.06508e+06	2.61446e+08	6.73507e+06	-5.27867	0.0384933	0.137523	1.36206	Organoheterocyclic compounds	Imidazopyrimidines
M293T293_NEG	1.16847e+08	2.3171e+08	3.1035e+08	1.1442e+06	1.53832e+06	3.28434e+06	2.19635e+08	1.98895e+06	-6.78696	0.0179402	0.0916068	1.3043	Phenylpropanoids and polyketides	Cinnamic acids and derivatives
M205T106_NEG	1.57434e+08	3.05766e+08	2.73124e+08	3.01994e+07	3.73768e+07	4.46945e+07	2.45441e+08	3.74236e+07	-2.71336	0.0100108	0.0694611	1.28086	--	--
M269T44_NEG	1.39342e+08	2.57849e+08	2.0796e+08	1.5419e+06	1.69436e+06	3.60248e+06	2.01717e+08	2.27958e+06	-6.46742	0.00438202	0.0465795	1.27111	Phenylpropanoids and polyketides	Flavonoids
M102T393_NEG	2.03414e+08	1.4807e+08	2.43143e+08	5.92554e+06	9.81257e+06	1.749e+07	1.98209e+08	1.1076e+07	-4.16151	0.00252953	0.0372389	1.26786	--	--
M415T171_NEG	2.06106e+08	1.92242e+08	3.04307e+08	4.12449e+07	2.21308e+07	7.14433e+07	2.34218e+08	4.49397e+07	-2.38179	0.00764942	0.0598689	1.25697	Phenylpropanoids and polyketides	Isoflavonoids
M337T376_1_NEG	1.7943e+08	2.69588e+08	2.98725e+08	5.46402e+07	6.56975e+07	8.68842e+07	2.49248e+08	6.9074e+07	-1.85137	0.00832686	0.0633891	1.20819	--	--
M147T418_NEG	3.82215e+08	1.8788e+08	2.01758e+08	6.2251e+07	4.94469e+07	9.78245e+07	2.57284e+08	6.98408e+07	-1.88122	0.0433453	0.147732	1.17499	Organic acids and derivatives	Hydroxy acids and derivatives
M497T168_NEG	2.37731e+08	1.64195e+08	2.06246e+08	3.47747e+07	3.17064e+07	8.36908e+07	2.02724e+08	5.00573e+07	-2.01787	0.00492058	0.0490961	1.13546	Lipids and lipid-like molecules	Prenol lipids
M265T25_NEG	3.0432e+08	3.63004e+08	3.72846e+08	4.90614e+08	4.75826e+08	5.43317e+08	3.46723e+08	5.03252e+08	0.537497	0.00614813	0.0542742	1.1261	Benzenoids	Benzene and substituted derivatives
M129T51_NEG	1.15283e+08	1.32711e+08	2.53954e+08	2.23711e+07	8.82667e+06	255485	1.67316e+08	1.04844e+07	-3.99626	0.0236353	0.106617	1.10728	Lipids and lipid-like molecules	Fatty Acyls
M383T286_NEG	1.04404e+08	2.09321e+08	2.04974e+08	3.5408e+07	9.88409e+06	9.88991e+06	1.729e+08	1.8394e+07	-3.23263	0.0119162	0.0746393	1.09998	--	--
M449T152_NEG	1.38832e+08	2.66901e+08	9.99382e+07	113782	785232	1.28708e+06	1.68557e+08	728698	-7.8537	0.0291769	0.118384	1.09158	--	--
M427T459_NEG	2.3204e+08	1.86042e+08	6.93808e+07	331144	235060	595939	1.62488e+08	387381	-8.71236	0.0286094	0.117144	1.08782	Organic oxygen compounds	Organooxygen compounds
M817T169_NEG	6.71692e+07	3.36062e+07	2.44004e+07	1.81493e+08	2.04195e+08	1.49997e+08	4.17252e+07	1.78562e+08	2.09743	0.00256735	0.0374498	1.07365	--	--
M425T275_NEG	8.38853e+07	2.82457e+08	1.48698e+08	1.76272e+07	2.4855e+06	4.85783e+06	1.7168e+08	8.32352e+06	-4.36638	0.0495549	0.160344	1.04823	--	--
M188T414_NEG	2.02198e+08	1.34875e+08	1.07382e+08	1.09842e+07	1.36883e+07	1.48022e+07	1.48151e+08	1.31582e+07	-3.49304	0.00871704	0.0643646	1.04213	Organic acids and derivatives	Carboxylic acids and derivatives
M435T263_NEG	9.20707e+07	1.68184e+08	1.88743e+08	1.13515e+07	1.31288e+07	2.50183e+07	1.49666e+08	1.64996e+07	-3.18125	0.0109765	0.0722483	1.03081	--	--
M341T192_1_NEG	6.37489e+07	1.55335e+08	2.09252e+08	1.70365e+06	2.55743e+06	2.07957e+06	1.42779e+08	2.11355e+06	-6.07797	0.0295972	0.119367	1.02868	Phenylpropanoids and polyketides	Coumarins and derivatives
M830T63_NEG	8.90721e+07	1.47798e+08	1.82963e+08	1.22662e+07	9.66061e+06	1.21248e+07	1.39944e+08	1.13505e+07	-3.62402	0.00935542	0.0668281	1.01873	Lipids and lipid-like molecules	Prenol lipids

## Sheet: Sheet2
Differentially accumulated metabolites (DAMs) in A. konjac in the comparison of KJ0 vs. KJ48
index	KJ0-1	KJ0-2	KJ0-3	KJ48-1	KJ48-2	KJ48-3	control_mean	case_mean	log2_FC(case_mean/control_mean)	Pvalue	fdr	vip	SuperClass	Class
M104T287_2_POS	4.05223e+10	4.67265e+10	4.52502e+10	2.98316e+10	2.34833e+10	2.93494e+10	4.41663e+10	2.75548e+10	-0.680646	0.00388235	0.0388176	13.5462	Organic acids and derivatives	Organic sulfuric acids and derivatives
M314T220_2_POS	2.49512e+10	2.91299e+10	3.16419e+10	1.60904e+10	1.48627e+10	1.18987e+10	2.85743e+10	1.42839e+10	-1.00033	0.00349328	0.0371974	12.5701	Alkaloids and derivatives	Morphinans
M579T234_2_POS	1.06594e+10	1.2085e+10	1.72274e+10	2.84418e+08	2.50046e+08	6.29075e+08	1.33239e+10	3.87846e+08	-5.10239	0.00293413	0.033882	12.0293	--	--
M565T263_3_POS	6.91947e+09	1.09461e+10	1.63302e+10	5.61014e+07	4.6965e+07	1.65546e+08	1.13986e+10	8.95374e+07	-6.99215	0.014282	0.0795516	10.9263	Phenylpropanoids and polyketides	Flavonoids
M136T181_2_POS	1.27002e+10	8.91679e+09	1.0494e+10	3.83879e+09	3.8986e+09	3.19513e+09	1.07037e+10	3.64417e+09	-1.55445	0.00323935	0.0355894	8.85973	Organoheterocyclic compounds	Imidazopyrimidines
M520T214_3_POS	1.4287e+10	7.2189e+09	9.23182e+09	2.28282e+09	2.85113e+09	3.10474e+09	1.02459e+10	2.74623e+09	-1.89952	0.0239373	0.101621	8.74096	--	--
M304T108_POS	3.07849e+09	422607	2.16526e+06	5.23116e+09	7.73208e+09	1.10988e+10	1.02703e+09	8.02069e+09	2.96525	0.0243965	0.10282	8.39069	Benzenoids	Benzene and substituted derivatives
M522T213_2_POS	3.90228e+09	4.14293e+09	4.86328e+09	5.17494e+08	5.11794e+08	5.21566e+08	4.30283e+09	5.16951e+08	-3.05719	0.000195321	0.0104155	6.60167	Lipids and lipid-like molecules	Glycerophospholipids
M138T310_3_POS	3.81668e+09	9.13003e+09	6.84662e+09	2.51568e+09	1.66921e+09	2.00288e+09	6.59777e+09	2.06259e+09	-1.67752	0.0436743	0.14323	6.53682	Alkaloids and derivatives	-
M104T393_3_POS	4.47974e+09	3.67859e+09	4.68118e+09	1.1028e+09	9.01391e+08	1.02637e+09	4.27984e+09	1.01019e+09	-2.08293	0.00046732	0.0147684	6.13113	Organic acids and derivatives	Carboxylic acids and derivatives
M613T39_POS	4.79408e+09	4.88486e+09	3.32521e+09	9.86411e+08	9.28714e+08	1.06851e+09	4.33472e+09	9.94544e+08	-2.12383	0.00275023	0.032679	6.05158	--	--
M146T378_1_POS	3.70914e+09	3.23848e+09	5.85548e+09	1.12369e+09	7.44982e+08	8.49025e+08	4.2677e+09	9.059e+08	-2.23604	0.0144532	0.0801114	5.98782	Organic acids and derivatives	Carboxylic acids and derivatives
M328T207_POS	3.06447e+09	3.41095e+09	5.33052e+09	1.15188e+09	1.18487e+09	6.70005e+08	3.93532e+09	1.00225e+09	-1.97323	0.0154686	0.0824868	5.56138	--	--
M365T390_3_POS	2.79628e+09	4.8187e+09	4.64525e+09	1.6977e+09	5.65635e+08	1.95427e+09	4.08674e+09	1.40587e+09	-1.53949	0.0258497	0.105506	5.20197	Organic oxygen compounds	Organooxygen compounds
M759T171_1_POS	5.74763e+09	3.92605e+09	4.03018e+09	2.00949e+09	2.79546e+09	2.59065e+09	4.56795e+09	2.4652e+09	-0.889843	0.029729	0.113897	4.5631	--	--
M154T66_POS	2.40038e+07	5.38775e+07	2.05589e+07	2.38188e+09	1.71037e+09	1.40725e+09	3.28134e+07	1.83317e+09	5.80391	0.00334617	0.0362769	4.45179	Organic acids and derivatives	Carboxylic acids and derivatives
M447T175_POS	1.34921e+09	1.90045e+09	1.99265e+09	4.68104e+07	4.24427e+07	9.35924e+07	1.74744e+09	6.09485e+07	-4.84151	0.0011156	0.0204392	4.36158	Phenylpropanoids and polyketides	Coumarins and derivatives
M150T87_POS	7.16224e+08	1.10392e+09	3.91156e+07	2.35045e+09	2.27924e+09	1.63861e+09	6.19753e+08	2.08943e+09	1.75335	0.0187833	0.0905628	3.92881	Organoheterocyclic compounds	Pyridines and derivatives
M87T393_POS	1.79244e+09	1.47201e+09	1.88659e+09	4.32755e+08	3.57661e+08	3.99722e+08	1.71701e+09	3.96713e+08	-2.11373	0.000488602	0.0147684	3.8954	Organic oxygen compounds	Organooxygen compounds
M335T39_POS	1.9386e+09	1.7905e+09	1.31464e+09	3.83294e+08	3.92222e+08	4.53807e+08	1.68125e+09	4.09774e+08	-2.03663	0.00256941	0.0317977	3.74139	--	--
M428T31_POS	6.48166e+08	1.52293e+09	1.89354e+09	2.08432e+08	1.72799e+08	2.13597e+08	1.35488e+09	1.98276e+08	-2.77258	0.035156	0.12532	3.37191	Lipids and lipid-like molecules	Fatty Acyls
M298T57_2_POS	1.19217e+07	1.09518e+08	1.11621e+07	7.10001e+08	1.1122e+09	9.32342e+08	4.42007e+07	9.18181e+08	4.37664	0.00193767	0.0266999	3.14191	Organoheterocyclic compounds	Benzimidazoles
M184T213_POS	9.67419e+08	1.5026e+09	9.52894e+08	1.98279e+08	2.29611e+08	2.5164e+08	1.14097e+09	2.2651e+08	-2.33261	0.00729389	0.0553071	3.11111	Lipids and lipid-like molecules	Glycerophospholipids
M621T211_POS	6.17702e+08	1.03774e+09	1.26105e+09	7.94044e+07	6.50269e+07	7.96967e+07	9.72165e+08	7.47093e+07	-3.70184	0.00892364	0.0610962	3.1046	--	--
M591T192_POS	9.00052e+08	1.08027e+09	1.06514e+09	2.14227e+08	2.18209e+08	2.18017e+08	1.01515e+09	2.16818e+08	-2.22714	0.000158496	0.00960079	3.0242	Lipids and lipid-like molecules	Glycerolipids
M311T181_2_POS	8.30178e+08	8.52845e+08	7.37571e+08	1.68891e+07	2.17176e+07	4.67093e+07	8.06865e+08	2.84387e+07	-4.8264	2.84286e-05	0.00532753	2.99164	Lipids and lipid-like molecules	Steroids and steroid derivatives
M783T168_1_POS	2.40366e+09	1.83792e+09	2.00663e+09	1.04211e+09	1.4798e+09	1.28674e+09	2.08274e+09	1.26955e+09	-0.714163	0.0179971	0.0889549	2.89143	Lipids and lipid-like molecules	Glycerophospholipids
M124T348_POS	8.44301e+08	7.44414e+08	7.73227e+08	1.59644e+08	1.50547e+08	9.35003e+07	7.87314e+08	1.34564e+08	-2.54865	5.55307e-05	0.00607044	2.74357	Organic acids and derivatives	Carboxylic acids and derivatives
M576T38_POS	1.0436e+09	7.87325e+08	9.82506e+08	1.35908e+09	1.62047e+09	1.91786e+09	9.37809e+08	1.63247e+09	0.799692	0.0178174	0.0884015	2.66535	--	--
M203T322_2_POS	9.60392e+08	6.64487e+08	7.15815e+08	2.3821e+08	5.40366e+07	2.21739e+08	7.80231e+08	1.71328e+08	-2.18714	0.00497165	0.0444534	2.59129	Benzenoids	Benzene and substituted derivatives
M337T366_POS	4.29682e+08	4.34e+08	7.13925e+08	4.61017e+07	3.37604e+07	3.76837e+07	5.25869e+08	3.91819e+07	-3.74644	0.00664436	0.0529942	2.31102	Phenylpropanoids and polyketides	Isoflavonoids
M258T407_2_POS	5.83017e+08	7.58859e+08	4.21558e+08	1.80554e+07	1.60104e+08	9.34646e+07	5.87811e+08	9.05414e+07	-2.6987	0.00927411	0.0625812	2.27612	Lipids and lipid-like molecules	Glycerophospholipids
M573T192_POS	5.29243e+08	6.35999e+08	6.1013e+08	1.2774e+08	1.32313e+08	1.61351e+08	5.91791e+08	1.40468e+08	-2.07484	0.00018256	0.0101581	2.27242	--	--
M313T191_POS	6.41947e+08	7.33847e+08	7.4046e+08	2.86262e+08	2.46588e+08	2.55638e+08	7.05418e+08	2.62829e+08	-1.42435	0.000200602	0.010526	2.2529	--	--
M595T38_POS	6.39046e+08	6.8887e+08	4.74454e+08	1.388e+08	1.37601e+08	1.56864e+08	6.0079e+08	1.44421e+08	-2.05658	0.00217807	0.0282829	2.24186	--	--
M298T96_POS	3.0668e+08	1.72156e+08	1.54091e+08	5.59433e+08	6.43401e+08	6.82488e+08	2.10976e+08	6.28441e+08	1.5747	0.00228324	0.0291568	2.15798	Nucleosides, nucleotides, and analogues	5'-deoxyribonucleosides
M310T34_POS	2.72051e+08	2.66639e+08	2.80218e+08	5.14992e+08	7.77883e+08	6.21824e+08	2.72969e+08	6.38233e+08	1.22535	0.0087833	0.0608339	1.9882	--	--
M313T194_POS	1.90649e+08	5.36491e+08	4.74086e+08	1.23017e+06	4.67203e+06	2.97855e+07	4.00408e+08	1.18959e+07	-5.07294	0.0220054	0.0977208	1.97992	Phenylpropanoids and polyketides	Coumarins and derivatives
M293T349_2_POS	2.99838e+08	3.03004e+08	5.15662e+08	4.4443e+07	2.89149e+07	2.72164e+07	3.72835e+08	3.35247e+07	-3.47524	0.00905711	0.0616802	1.91917	--	--
M478T220_POS	4.34602e+08	4.81012e+08	4.9687e+08	1.16144e+08	1.64726e+08	1.88067e+08	4.70828e+08	1.56312e+08	-1.59077	0.000370148	0.0134133	1.89369	--	--
M357T542_2_POS	3.9561e+08	4.19706e+08	3.70886e+08	1.0714e+08	7.69063e+07	1.09054e+08	3.95401e+08	9.77002e+07	-2.01688	7.0377e-05	0.00632333	1.84915	--	--
M759T137_POS	5.48629e+08	4.91335e+08	3.92331e+08	1.92132e+08	1.44013e+08	2.18306e+08	4.77432e+08	1.84817e+08	-1.3692	0.00443286	0.0421226	1.78716	Lipids and lipid-like molecules	Glycerophospholipids
M178T62_POS	6.1733e+08	5.08691e+08	5.17273e+08	3.6057e+08	2.56587e+08	1.61109e+08	5.47765e+08	2.59422e+08	-1.07825	0.0128222	0.0751606	1.7433	--	--
M372T209_1_POS	2.52096e+08	2.93068e+08	3.3847e+08	3.97082e+07	2.95098e+07	2.41082e+07	2.94545e+08	3.11087e+07	-3.24309	0.000484997	0.0147684	1.73519	--	--
M123T380_POS	1.63324e+08	8.63003e+07	6.37167e+07	4.15287e+08	3.57493e+08	2.64495e+08	1.04447e+08	3.45758e+08	1.72699	0.0105823	0.0675185	1.60094	Organic oxygen compounds	Organooxygen compounds
M188T359_POS	1.10834e+08	3.59608e+08	3.80807e+08	2.0632e+07	1.89965e+07	2.74536e+07	2.8375e+08	2.23607e+07	-3.66558	0.0393787	0.134244	1.58831	Lipids and lipid-like molecules	Fatty Acyls
M285T155_POS	1.57169e+08	2.10492e+08	4.04764e+08	9.22943e+06	8.46259e+06	1.44812e+07	2.57475e+08	1.07244e+07	-4.58546	0.0305393	0.115518	1.57792	Phenylpropanoids and polyketides	Isoflavonoids
M441T225_POS	3.60882e+08	3.53866e+08	3.2169e+08	1.79755e+08	1.04311e+08	1.38177e+08	3.45479e+08	1.40748e+08	-1.29549	0.00119845	0.0214185	1.52017	Organoheterocyclic compounds	Indoles and derivatives
M231T228_POS	2.37984e+08	1.55298e+08	2.43648e+08	1.9278e+07	2.26587e+07	2.34111e+07	2.1231e+08	2.17826e+07	-3.28493	0.00263113	0.0320773	1.46387	Organic acids and derivatives	Carboxylic acids and derivatives
M206T94_POS	9.08989e+07	2.72888e+08	3.32729e+08	2.18798e+07	1.23058e+07	6.14777e+06	2.32172e+08	1.34445e+07	-4.11011	0.0398657	0.135312	1.45582	--	--
M316T163_POS	3.3108e+08	3.16298e+08	2.23391e+08	9.33854e+07	9.62101e+07	1.02058e+08	2.90256e+08	9.72179e+07	-1.57803	0.00464878	0.0431078	1.44445	--	--
M337T194_POS	9.63238e+07	2.80377e+08	2.64395e+08	1.23024e+06	7.65555e+06	1.47013e+07	2.13699e+08	7.86238e+06	-4.76447	0.0251472	0.103867	1.43505	Organic oxygen compounds	Organooxygen compounds
M397T180_3_POS	633101	1.81221e+07	2.30232e+06	1.43395e+08	1.56752e+08	3.36739e+08	7.01917e+06	2.12295e+08	4.91863	0.0305094	0.115518	1.42178	Lignans, neolignans and related compounds	Lignan lactones
M171T322_POS	1.46514e+08	1.47266e+08	3.44648e+08	1.30606e+07	8.16029e+06	8.68769e+06	2.12809e+08	9.96952e+06	-4.41589	0.0370675	0.129667	1.42163	Organic acids and derivatives	Keto acids and derivatives
M116T423_POS	1.98621e+08	1.97705e+08	1.6979e+08	2.10582e+07	1.60157e+07	1.97289e+07	1.88705e+08	1.89342e+07	-3.31706	5.9587e-05	0.00612404	1.39579	Organic acids and derivatives	Carboxylic acids and derivatives
M112T265_POS	3.30862e+08	1.78809e+08	2.62969e+08	8.83856e+07	7.40266e+07	6.76408e+07	2.57547e+08	7.66843e+07	-1.74783	0.0151835	0.0819658	1.38228	Organoheterocyclic compounds	Diazines
M286T106_POS	4.66646e+06	9.29315e+06	6.81747e+06	9.39679e+07	1.90149e+08	2.89682e+08	6.92569e+06	1.91266e+08	4.78748	0.0310303	0.116903	1.35113	Lipids and lipid-like molecules	Prenol lipids
M132T292_1_POS	1.7418e+08	1.67273e+08	2.64983e+08	3.75598e+07	3.65238e+07	3.89328e+07	2.02145e+08	3.76721e+07	-2.42382	0.00641405	0.05181	1.34463	--	--
M269T220_POS	2.68361e+08	3.28081e+08	3.46573e+08	1.84961e+08	1.46998e+08	1.21291e+08	3.14338e+08	1.51083e+08	-1.05697	0.0055249	0.0473697	1.3349	--	--
M319T281_POS	6.86357e+07	2.186e+08	2.71051e+08	6.05666e+06	940212	5.37928e+06	1.86096e+08	4.12538e+06	-5.49537	0.039971	0.135508	1.32814	Organic acids and derivatives	Carboxylic acids and derivatives
M527T449_2_POS	6.87377e+07	2.46183e+08	2.57499e+08	1.28897e+07	1.11099e+07	1.83137e+07	1.90806e+08	1.41044e+07	-3.75789	0.0446	0.144908	1.2969	Organic oxygen compounds	Organooxygen compounds
M643T177_POS	2.5857e+08	2.86705e+08	1.7094e+08	6.79457e+07	5.05285e+07	1.14415e+08	2.38738e+08	7.76297e+07	-1.62075	0.0154147	0.0823999	1.28505	--	--
M317T38_1_POS	5.3649e+06	2.82581e+06	1.88359e+06	2.21858e+08	1.98929e+08	7.38078e+07	3.3581e+06	1.64865e+08	5.6175	0.0246815	0.103108	1.27867	Phenylpropanoids and polyketides	Flavonoids
M423T35_POS	1.63216e+08	1.31118e+08	1.74238e+08	1.44054e+07	1.5288e+07	1.71216e+07	1.56191e+08	1.5605e+07	-3.32323	0.000409628	0.0144449	1.27134	Lipids and lipid-like molecules	Steroids and steroid derivatives
M785T151_POS	2.40228e+08	1.62441e+08	2.05224e+08	5.07349e+07	7.02597e+07	6.13855e+07	2.02631e+08	6.07934e+07	-1.73687	0.00361825	0.0376103	1.2545	--	--
M143T200_2_POS	1.39633e+08	1.77947e+08	1.51755e+08	3.16906e+07	1.52344e+07	9.64913e+06	1.56445e+08	1.8858e+07	-3.0524	0.000464582	0.0147684	1.24872	--	--
M215T347_POS	1.46557e+08	1.62531e+08	1.11156e+08	2.01667e+06	3.44194e+06	8.76824e+06	1.40081e+08	4.74228e+06	-4.88454	0.000905985	0.018696	1.23079	Alkaloids and derivatives	Harmala alkaloids
M285T129_POS	9.78201e+07	1.74091e+08	1.88977e+08	1.70289e+07	1.43931e+07	1.39854e+07	1.5363e+08	1.51358e+07	-3.34342	0.0080297	0.0580031	1.21983	--	--
M341T189_POS	1.33476e+08	1.74971e+08	1.97942e+08	4.01085e+07	3.25382e+07	3.70607e+07	1.68796e+08	3.65691e+07	-2.20658	0.00223691	0.0287684	1.21637	Lipids and lipid-like molecules	Glycerolipids
M178T184_POS	1.80772e+08	1.63743e+08	2.16718e+08	6.45327e+07	5.35388e+07	5.84983e+07	1.87077e+08	5.88566e+07	-1.66836	0.00129485	0.0220519	1.20842	--	--
M337T219_POS	2.90191e+08	3.15589e+08	3.04292e+08	8.43622e+07	2.44699e+08	1.25892e+08	3.03357e+08	1.51651e+08	-1.00026	0.0354795	0.126188	1.20264	Lipids and lipid-like molecules	Fatty Acyls
M105T37_POS	1.88242e+08	1.4788e+08	1.24572e+08	3.01425e+08	2.76916e+08	2.70856e+08	1.53565e+08	2.83066e+08	0.882292	0.00339761	0.0366528	1.19632	Benzenoids	Benzene and substituted derivatives
M287T150_POS	1.05376e+07	8.85336e+06	1.34338e+07	1.06474e+08	1.1887e+08	2.25212e+08	1.09416e+07	1.50185e+08	3.77886	0.0209683	0.0957739	1.1873	Lipids and lipid-like molecules	Steroids and steroid derivatives
M176T53_POS	1.17517e+08	1.75559e+08	2.20472e+08	5.45147e+07	4.42011e+07	3.55167e+07	1.71182e+08	4.47441e+07	-1.93576	0.0140027	0.0787867	1.15416	Phenylpropanoids and polyketides	Coumarins and derivatives
M302T317_POS	8.25629e+07	2.49515e+08	1.18877e+08	7.0415e+06	5.40639e+06	8.80249e+06	1.50318e+08	7.08346e+06	-4.40742	0.0475883	0.149847	1.14842	-	-
M741T173_POS	2.09177e+08	1.11183e+08	1.09542e+08	2.43555e+08	2.78981e+08	2.87679e+08	1.43301e+08	2.70072e+08	0.914297	0.0235614	0.101132	1.13229	Lipids and lipid-like molecules	Glycerophospholipids
M134T61_POS	1.68462e+07	7.13263e+06	1.51036e+07	2.30098e+08	9.0249e+07	1.09616e+08	1.30275e+07	1.43321e+08	3.45962	0.0410876	0.138131	1.10976	--	--
M361T446_4_POS	9.30378e+07	9.06403e+07	1.40104e+08	969618	370430	888971	1.07927e+08	743006	-7.18247	0.00264672	0.0322075	1.0973	--	--
M789T168_POS	1.83884e+08	1.51046e+08	1.14229e+08	3.27265e+07	4.19276e+07	4.05704e+07	1.4972e+08	3.84082e+07	-1.96278	0.00540781	0.0467939	1.09608	--	--
M274T352_POS	1.17234e+08	1.97233e+08	7.42709e+07	3.50745e+06	4.35467e+06	1.27966e+07	1.29579e+08	6.88624e+06	-4.23398	0.0274302	0.109196	1.09179	--	--
M223T49_POS	4.77082e+07	4.24766e+07	2.57314e+07	1.51809e+08	1.20207e+08	1.57371e+08	3.86387e+07	1.43129e+08	1.8892	0.00143303	0.0232654	1.08153	Phenylpropanoids and polyketides	Coumarins and derivatives
M353T366_2_POS	1.61594e+08	7.64589e+07	1.25541e+08	1.54973e+07	9.27638e+06	1.31017e+07	1.21198e+08	1.26251e+07	-3.263	0.0117936	0.0712286	1.07823	--	--
M283T194_POS	5.35241e+07	1.77281e+08	1.35292e+08	1.85718e+06	1.88684e+06	6.85444e+06	1.22033e+08	3.53282e+06	-5.1103	0.0311438	0.117226	1.07533	Benzenoids	Benzene and substituted derivatives
M267T327_POS	8.09445e+07	1.75112e+08	2.05036e+08	3.71781e+07	3.14775e+07	4.04843e+07	1.53697e+08	3.638e+07	-2.07888	0.0351821	0.125345	1.07321	--	--
M266T423_POS	1.63905e+08	1.21245e+08	9.05743e+07	2.19721e+07	1.52836e+07	2.24602e+07	1.25242e+08	1.99053e+07	-2.65349	0.00790175	0.0576502	1.06108	Benzenoids	Phenol ethers
M330T226_POS	1.11653e+08	1.62889e+08	1.74309e+08	6.14874e+07	4.07925e+07	3.46624e+07	1.49617e+08	4.56474e+07	-1.71267	0.00763353	0.0565744	1.05907	Alkaloids and derivatives	Morphinans
M327T175_POS	1.01804e+08	1.18711e+08	1.54705e+08	5.3172e+07	1.3416e+06	3.74011e+07	1.25073e+08	3.06382e+07	-2.02937	0.0124816	0.0737536	1.00637	Organic acids and derivatives	Organic phosphoric acids and derivatives

## Sheet: Sheet3
Differentially accumulated metabolites (DAMs) in A. muelleri in the comparison of MJ0 vs. MJ24
index	MJ0-1	MJ0-2	MJ0-3	MJ24-1	MJ24-2	MJ24-3	control_mean	case_mean	log2_FC(case_mean/control_mean)	Pvalue	fdr	vip	SuperClass	Class
M306T161_2_POS	2.80774e+06	1.86588e+06	3.91664e+06	3.71711e+09	2.00109e+09	4.27946e+09	2.86342e+06	3.33255e+09	10.1847	0.00828422	0.442444	15.0985	Lipids and lipid-like molecules	Sphingolipids
M300T77_2_POS	5.04113e+09	2.60326e+09	4.95091e+09	8.8549e+08	1.47482e+09	4.82118e+08	4.19843e+09	9.47477e+08	-2.14769	0.0185936	0.45877	14.4521	Alkaloids and derivatives	Morphinans
M365T390_3_POS	2.23101e+08	1.16629e+09	9.319e+08	3.72978e+09	2.24812e+09	4.17838e+09	7.73763e+08	3.38542e+09	2.12937	0.0157677	0.453197	13.1414	Organic oxygen compounds	Organooxygen compounds
M286T142_3_POS	2.85504e+09	2.69296e+09	4.95793e+09	8.59184e+08	1.74663e+09	9.24094e+08	3.50198e+09	1.17664e+09	-1.5735	0.0412146	0.498325	12.4418	Alkaloids and derivatives	Morphinans
M322T150_POS	1.71027e+06	170419	2.33881e+06	1.7001e+09	6.37543e+08	1.52773e+09	1.4065e+06	1.28846e+09	9.83932	0.0174061	0.45877	9.26957	Organic nitrogen compounds	Organonitrogen compounds
M203T282_2_POS	1.49156e+07	2.69401e+08	1.46224e+08	7.93309e+08	7.84864e+08	1.81139e+09	1.43513e+08	1.12985e+09	2.97688	0.0473752	0.506208	7.86524	Phenylpropanoids and polyketides	Coumarins and derivatives
M328T224_POS	1.78193e+09	1.1124e+09	1.97803e+09	6.43719e+08	6.73773e+08	7.56472e+08	1.62412e+09	6.91321e+08	-1.23223	0.0242188	0.465817	7.53242	Organoheterocyclic compounds	Furopyrans
M581T205_POS	1.9326e+09	1.89582e+09	1.67606e+09	8.22202e+08	1.1432e+09	8.80224e+08	1.83483e+09	9.4854e+08	-0.951864	0.0022273	0.427409	7.51427	-	-
M121T243_1_POS	1.87207e+08	1.47677e+08	1.0754e+08	1.08215e+09	1.03681e+09	8.03101e+08	1.47475e+08	9.7402e+08	2.72348	0.000762895	0.427409	7.11187	Benzenoids	Benzene and substituted derivatives
M600T211_POS	1.17714e+09	1.06714e+09	1.29592e+09	4.42746e+08	6.43086e+08	3.94543e+08	1.18006e+09	4.93458e+08	-1.25786	0.00242494	0.427409	6.90707	--	--
M154T66_POS	8.35952e+08	7.55357e+08	2.22279e+08	1.29593e+09	1.16827e+09	1.29098e+09	6.04529e+08	1.25173e+09	1.05004	0.0303554	0.480697	6.52994	Organic acids and derivatives	Carboxylic acids and derivatives
M200T289_POS	1.82278e+07	1.44796e+08	6.51915e+07	4.90886e+08	4.89203e+08	1.1212e+09	7.60717e+07	7.00429e+08	3.20281	0.0431154	0.498475	6.29023	Organoheterocyclic compounds	Benzimidazoles
M288T162_POS	256931	113697	2.18439e+08	7.50774e+08	3.79119e+08	8.39712e+08	7.29364e+07	6.56535e+08	3.17016	0.0212612	0.462684	6.0548	--	--
M300T52_1_POS	8.67905e+08	4.71656e+08	9.57922e+08	2.16178e+08	2.33338e+08	1.36491e+08	7.65828e+08	1.95336e+08	-1.97107	0.0200254	0.460866	6.02761	Alkaloids and derivatives	Morphinans
M381T390_POS	3.80739e+07	2.3052e+08	2.08303e+08	6.84582e+08	4.47179e+08	6.94276e+08	1.58966e+08	6.08679e+08	1.93697	0.0112661	0.453197	5.38507	Organoheterocyclic compounds	Azobenzenes
M328T281_POS	5.64051e+08	2.77575e+08	6.11233e+08	2.72903e+07	2.40895e+08	3.92354e+07	4.84286e+08	1.02474e+08	-2.24061	0.0380236	0.496807	4.98668	--	--
M395T179_1_POS	1.92004e+07	2.05907e+07	3.45692e+07	2.15184e+08	3.56681e+08	5.56142e+08	2.47868e+07	3.76002e+08	3.9231	0.0238651	0.465817	4.61747	--	--
M263T289_POS	3.59456e+08	5.72964e+08	6.08596e+08	8.17511e+08	1.00323e+09	9.0843e+08	5.13672e+08	9.09724e+08	0.824582	0.0137845	0.453197	4.53146	Organoheterocyclic compounds	Diazanaphthalenes
M397T180_3_POS	5.74831e+07	8.06053e+07	4.51701e+07	2.18204e+08	3.12374e+08	4.32181e+08	6.10862e+07	3.2092e+08	2.39329	0.0143927	0.453197	4.04714	Lignans, neolignans and related compounds	Lignan lactones
M212T133_POS	9.94633e+07	7.93609e+07	4.04137e+07	3.12592e+08	4.10916e+08	1.9919e+08	7.30793e+07	3.07566e+08	2.07336	0.0210545	0.462684	3.40395	--	--
M244T283_POS	3.10981e+07	1.41885e+08	9.66242e+07	2.83597e+08	2.16061e+08	2.63021e+08	8.98692e+07	2.54226e+08	1.50022	0.0122454	0.453197	3.19694	Organic oxygen compounds	Organooxygen compounds
M328T246_POS	3.298e+08	1.92802e+08	3.19332e+08	1.1277e+08	1.13216e+08	1.34717e+08	2.80645e+08	1.20235e+08	-1.22289	0.0228544	0.465817	3.06708	Alkaloids and derivatives	Morphinans
M209T172_POS	1.41193e+07	2.67721e+07	2.98353e+07	1.50004e+08	9.98794e+07	1.6381e+08	2.35756e+07	1.37898e+08	2.54824	0.00464179	0.427409	2.77688	Phenylpropanoids and polyketides	Linear 1,3-diarylpropanoids
M146T378_1_POS	1.19523e+08	1.43129e+08	1.81509e+08	2.5422e+08	2.32123e+08	2.40296e+08	1.48053e+08	2.42213e+08	0.710159	0.00799035	0.442444	2.30527	Organic acids and derivatives	Carboxylic acids and derivatives
M423T35_POS	2.60876e+07	3.61396e+07	1.38127e+07	5.21314e+07	9.00902e+07	9.62962e+07	2.53466e+07	7.95059e+07	1.64927	0.0237136	0.465817	1.78594	Lipids and lipid-like molecules	Steroids and steroid derivatives
M178T62_POS	8.50779e+07	8.9338e+07	1.32683e+08	4.5384e+07	6.83325e+07	5.15383e+07	1.02366e+08	5.5085e+07	-0.894011	0.0471479	0.505299	1.76735	--	--
M152T287_POS	2.6649e+07	4.99507e+07	6.22569e+07	8.93087e+07	7.83881e+07	1.17816e+08	4.62855e+07	9.51708e+07	1.03996	0.0358884	0.49347	1.68826	--	--
M134T61_POS	4.97205e+06	8.26179e+06	1.28038e+07	5.68912e+07	2.33648e+07	6.9213e+07	8.67922e+06	4.9823e+07	2.52117	0.0414305	0.498325	1.63469	--	--
M603T149_POS	2.02957e+06	9.78242e+06	3.61641e+06	3.81152e+07	3.035e+07	6.05663e+07	5.1428e+06	4.30105e+07	3.06406	0.0155481	0.453197	1.59751	--	--
M165T493_POS	7.93451e+07	5.96977e+07	1.02632e+08	4.17195e+07	4.93835e+07	3.92124e+07	8.05583e+07	4.34385e+07	-0.89106	0.0439235	0.500501	1.54668	Organic oxygen compounds	Organooxygen compounds
M246T539_POS	3.19558e+07	3.69868e+07	2.97103e+07	5.82987e+07	5.33575e+07	7.90483e+07	3.28843e+07	6.35682e+07	0.950906	0.0197629	0.46049	1.44045	Benzenoids	Phenol ethers
M291T436_2_POS	1.27535e+07	3.52388e+07	3.81407e+07	7.84329e+07	5.2296e+07	6.36349e+07	2.8711e+07	6.47879e+07	1.17412	0.0307512	0.480697	1.42688	Organic acids and derivatives	Carboxylic acids and derivatives
M286T200_POS	2.66552e+07	4.18846e+07	4.07759e+07	6.75176e+06	1.16313e+07	4.66033e+06	3.64386e+07	7.68113e+06	-2.24607	0.00566917	0.427409	1.37798	Alkaloids and derivatives	Morphinans
M332T320_1_POS	9.08483e+06	6.48869e+06	1.24173e+07	4.0608e+07	2.27059e+07	4.21325e+07	9.33026e+06	3.51488e+07	1.91349	0.0162474	0.453475	1.30134	Organoheterocyclic compounds	Quinolines and derivatives
M118T243_POS	7.38978e+06	6.24364e+06	7.91254e+06	4.46993e+07	3.49921e+07	2.77491e+07	7.18199e+06	3.58135e+07	2.31805	0.00438982	0.427409	1.30112	Organoheterocyclic compounds	Heteroaromatic compounds
M213T180_POS	1.87991e+07	2.27343e+07	3.53025e+07	5.19793e+07	4.34152e+07	6.41348e+07	2.5612e+07	5.31765e+07	1.05397	0.0241835	0.465817	1.28218	Alkaloids and derivatives	Harmala alkaloids
M453T36_POS	1.07268e+08	8.40043e+07	8.31783e+07	6.99814e+07	4.48592e+07	5.6023e+07	9.14836e+07	5.69545e+07	-0.683703	0.0323522	0.483366	1.2807	--	--
M413T280_POS	4.83238e+06	2.73222e+07	2.13662e+07	3.53769e+07	4.44931e+07	5.69148e+07	1.78403e+07	4.55949e+07	1.35374	0.0389957	0.498325	1.24491	--	--
M158T415_POS	5.96265e+06	1.45968e+07	1.63232e+07	4.26827e+07	2.7525e+07	3.85384e+07	1.22942e+07	3.62487e+07	1.55995	0.0124338	0.453197	1.22491	Organic acids and derivatives	Carboxylic acids and derivatives
M191T289_POS	529813	4.71198e+06	1.2269e+06	1.80647e+07	1.90521e+07	3.85123e+07	2.15623e+06	2.52097e+07	3.5474	0.0272961	0.47743	1.22101	--	--
M319T365_2_POS	1.5837e+07	1.56169e+07	1.99074e+07	3.53181e+07	2.95629e+07	5.26588e+07	1.71204e+07	3.91799e+07	1.19439	0.0356726	0.49347	1.18406	--	--
M195T181_POS	4.25522e+06	5.6429e+06	3.23303e+06	2.08014e+07	1.85898e+07	3.17792e+07	4.37705e+06	2.37235e+07	2.43829	0.00947677	0.453197	1.14625	Benzenoids	Benzene and substituted derivatives
M103T243_POS	6.08034e+06	5.3183e+06	1.6061e+07	3.74311e+07	3.61926e+07	2.66549e+07	9.1532e+06	3.34262e+07	1.86863	0.00749107	0.434813	1.12827	--	--
M330T226_POS	3.74858e+07	2.38336e+07	4.20097e+07	1.5998e+07	1.28517e+07	1.5355e+07	3.4443e+07	1.47349e+07	-1.22497	0.0237328	0.465817	1.08874	Alkaloids and derivatives	Morphinans
M327T79_POS	2.40008e+07	2.9833e+07	2.75024e+07	4.52068e+07	3.44031e+07	5.22109e+07	2.71121e+07	4.39403e+07	0.696609	0.0366498	0.49347	1.05292	Benzenoids	Benzene and substituted derivatives
M144T426_POS	7.24037e+06	8.22751e+06	6.54644e+06	2.48912e+07	1.41673e+07	3.21701e+07	7.33811e+06	2.37429e+07	1.69402	0.0353912	0.49347	1.05285	--	--
M305T277_POS	1.46716e+06	2.89234e+06	4.28331e+06	2.51213e+07	8.31406e+06	2.28313e+07	2.88094e+06	1.87555e+07	2.70271	0.0406894	0.498325	1.00651	Organic acids and derivatives	Organic thiophosphoric acids and derivatives
M133T428_2_NEG	2.51235e+10	2.95743e+10	2.73949e+10	3.24309e+10	3.34611e+10	3.30622e+10	2.73643e+10	3.29847e+10	0.269506	0.0130567	0.40658	16.421	Organic acids and derivatives	Hydroxy acids and derivatives
M275T428_2_NEG	8.0734e+09	1.07965e+10	8.90251e+09	1.27039e+10	1.2887e+10	1.27082e+10	9.25746e+09	1.27664e+10	0.46366	0.0122331	0.406078	13.1337	Organic oxygen compounds	Organooxygen compounds
M341T390_2_NEG	3.66706e+08	1.31058e+09	9.9443e+08	4.44196e+09	2.1436e+09	5.20254e+09	8.90572e+08	3.92937e+09	2.14149	0.0340512	0.486427	12.2941	--	--
M113T288_NEG	1.86366e+08	5.17401e+08	4.39953e+08	1.04899e+09	9.8339e+08	1.70457e+09	3.8124e+08	1.24565e+09	1.70813	0.0262032	0.486427	6.54516	Organic oxygen compounds	Organooxygen compounds
M115T428_NEG	3.18845e+09	3.80077e+09	3.48654e+09	4.22977e+09	4.31042e+09	4.30999e+09	3.49192e+09	4.28339e+09	0.294733	0.0114533	0.398027	6.21402	--	--
M683T390_2_NEG	5.61887e+06	9.74599e+07	5.89885e+07	8.03633e+08	3.05392e+08	9.98975e+08	5.40224e+07	7.02666e+08	3.70121	0.0356802	0.486427	5.68278	Organic oxygen compounds	Organooxygen compounds
M89T288_NEG	1.43464e+08	3.80926e+08	1.47178e+08	6.65889e+08	6.48412e+08	1.0576e+09	2.23856e+08	7.90634e+08	1.82044	0.0216261	0.469995	5.39831	Organic acids and derivatives	Hydroxy acids and derivatives
M179T277_2_NEG	9.40854e+07	2.97049e+08	2.16115e+08	5.95682e+08	6.49973e+08	1.0542e+09	2.02417e+08	7.66619e+08	1.92118	0.0225198	0.483546	5.29828	Organic oxygen compounds	Organooxygen compounds
M329T170_NEG	1.7393e+08	1.33916e+08	2.92128e+08	6.99246e+08	4.86199e+08	9.73086e+08	1.99991e+08	7.1951e+08	1.84708	0.0250408	0.486427	5.03084	Lipids and lipid-like molecules	Steroids and steroid derivatives
M195T404_NEG	7.83537e+07	4.88357e+08	4.95582e+06	5.57817e+08	6.56694e+08	7.94548e+08	1.90556e+08	6.69686e+08	1.81327	0.0442025	0.511377	4.82562	Organic acids and derivatives	Hydroxy acids and derivatives
M207T34_NEG	4.3306e+07	5.01695e+07	1.38124e+08	7.18793e+08	8.29287e+08	2.80399e+08	7.71997e+07	6.09493e+08	2.98094	0.0353764	0.486427	4.4924	Benzenoids	Naphthalenes
M153T25_NEG	3.36356e+06	2.60335e+06	1.87163e+06	4.45898e+08	2.66984e+08	4.45677e+08	2.61284e+06	3.86187e+08	7.20753	0.00299888	0.286795	4.49098	Benzenoids	Benzene and substituted derivatives
M135T354_NEG	6.77064e+07	1.44827e+08	1.54691e+08	4.5628e+08	4.70528e+08	5.07657e+08	1.22408e+08	4.78155e+08	1.96578	0.000349248	0.133912	4.27781	Organic oxygen compounds	Organooxygen compounds
M117T412_1_NEG	4.25618e+08	5.17709e+08	6.35767e+08	8.3068e+08	7.28361e+08	9.94096e+08	5.26365e+08	8.51046e+08	0.693175	0.0299668	0.486427	3.89251	Organic acids and derivatives	Carboxylic acids and derivatives
M101T288_NEG	1.03516e+08	1.89885e+08	1.756e+08	3.72499e+08	3.51766e+08	5.62119e+08	1.56334e+08	4.28795e+08	1.45566	0.0194275	0.459413	3.69734	--	--
M209T104_NEG	2.08919e+07	2.73268e+07	1.4439e+07	1.21232e+08	2.54911e+08	4.24667e+08	2.08859e+07	2.66937e+08	3.6759	0.0488179	0.518849	3.35919	Lipids and lipid-like molecules	Fatty Acyls
M71T426_NEG	6.54408e+08	7.69696e+08	7.14681e+08	8.24793e+08	9.38861e+08	8.50655e+08	7.12928e+08	8.71436e+08	0.289638	0.0298023	0.486427	2.59721	Organic oxygen compounds	Organooxygen compounds
M291T428_NEG	1.64512e+08	2.30985e+08	2.07326e+08	3.1019e+08	3.14648e+08	2.97091e+08	2.00941e+08	3.0731e+08	0.612918	0.0061794	0.334841	2.26709	Organic oxygen compounds	Organooxygen compounds
M237T392_NEG	4.10778e+07	9.12336e+07	7.60844e+07	1.4039e+08	1.45867e+08	1.69806e+08	6.94653e+07	1.52021e+08	1.12991	0.00897586	0.37949	2.03071	--	--
M301T48_NEG	3.86312e+07	3.55402e+07	8.71931e+06	1.0051e+08	7.99712e+07	1.16254e+08	2.76302e+07	9.89116e+07	1.83989	0.00731536	0.358348	1.9546	Lignans, neolignans and related compounds	Flavonolignans
M89T428_NEG	3.79222e+08	4.411e+08	4.18519e+08	4.76063e+08	4.86019e+08	4.92522e+08	4.12947e+08	4.84868e+08	0.231636	0.018369	0.452228	1.84706	Organoheterocyclic compounds	Indoles and derivatives
M75T70_NEG	3.35597e+07	5.59145e+07	4.19346e+07	7.46193e+07	7.95057e+07	1.26475e+08	4.38029e+07	9.35333e+07	1.09445	0.0488883	0.518849	1.5462	Organic acids and derivatives	Carboxylic acids and derivatives
M148T80_NEG	3.01095e+07	3.55538e+07	1.64939e+07	5.58916e+07	5.71617e+07	1.00408e+08	2.73857e+07	7.11536e+07	1.37751	0.0493453	0.518849	1.47055	Organic acids and derivatives	Carboxylic acids and derivatives
M271T52_2_NEG	2.91693e+06	4.56332e+06	4.31207e+06	3.74255e+07	2.70844e+07	6.27883e+07	3.93077e+06	4.24327e+07	3.43229	0.0222427	0.481447	1.39651	Lipids and lipid-like molecules	Fatty Acyls
M125T288_NEG	8.67505e+06	1.96915e+07	1.7849e+07	4.80357e+07	3.84525e+07	6.54681e+07	1.54052e+07	5.06521e+07	1.71721	0.0149316	0.417462	1.34126	Benzenoids	Phenols
M322T126_NEG	5.9073e+06	1.20663e+07	5.84109e+06	4.26134e+07	2.86735e+07	5.5254e+07	7.93824e+06	4.21803e+07	2.40968	0.0125681	0.406418	1.34099	Organoheterocyclic compounds	Indoles and derivatives
M312T58_NEG	9.18488e+06	9.50563e+06	8.14006e+06	4.12979e+07	2.64318e+07	5.7416e+07	8.94352e+06	4.17152e+07	2.22166	0.021598	0.469995	1.29478	--	--
M296T52_NEG	5.15797e+06	9.62984e+06	1.20405e+07	3.59103e+07	2.51759e+07	5.45377e+07	8.94277e+06	3.85413e+07	2.10761	0.0283269	0.486427	1.21035	--	--

## Sheet: Sheet4
Differentially accumulated metabolites (DAMs) in A. muelleri in the comparison of MJ0 vs. MJ48
index	MJ0-1	MJ0-2	MJ0-3	MJ48-1	MJ48-2	MJ48-3	control_mean	case_mean	log2_FC(case_mean/control_mean)	Pvalue	fdr	vip	SuperClass	Class
M300T77_2_POS	5.04113e+09	2.60326e+09	4.95091e+09	5.9611e+08	2.29816e+09	1.43882e+09	4.19843e+09	1.44436e+09	-1.53942	0.0424407	0.890729	14.2338	Alkaloids and derivatives	Morphinans
M328T224_POS	1.78193e+09	1.1124e+09	1.97803e+09	2.14728e+08	8.89984e+08	6.44867e+08	1.62412e+09	5.83193e+08	-1.47761	0.033759	0.890729	8.75426	Organoheterocyclic compounds	Furopyrans
M581T205_POS	1.9326e+09	1.89582e+09	1.67606e+09	1.20683e+08	1.24971e+09	8.93615e+08	1.83483e+09	7.5467e+08	-1.28173	0.0344612	0.890729	8.33614	-	-
M300T52_1_POS	8.67905e+08	4.71656e+08	9.57922e+08	3.91847e+07	4.49602e+08	1.95874e+08	7.65828e+08	2.2822e+08	-1.74659	0.048326	0.890729	6.29592	Alkaloids and derivatives	Morphinans
M328T281_POS	5.64051e+08	2.77575e+08	6.11233e+08	7.09614e+06	1.55634e+08	2.24467e+07	4.84286e+08	6.17256e+07	-2.97192	0.020963	0.887073	5.68532	--	--
M298T96_POS	1.10643e+08	1.45889e+08	4.14249e+08	9.23847e+08	4.65736e+08	6.57091e+08	2.23593e+08	6.82225e+08	1.60937	0.0488328	0.890729	5.24224	Nucleosides, nucleotides, and analogues	5'-deoxyribonucleosides
M310T34_POS	5.86964e+08	7.57969e+08	6.79334e+08	3.14853e+08	4.83574e+08	3.35961e+08	6.74756e+08	3.78129e+08	-0.835486	0.0149706	0.801142	4.4309	--	--
M328T246_POS	3.298e+08	1.92802e+08	3.19332e+08	3.96497e+07	1.50774e+08	1.21924e+08	2.80645e+08	1.04116e+08	-1.43055	0.0329564	0.890729	3.58498	Alkaloids and derivatives	Morphinans
M438T253_POS	167546	5.94777e+07	1.77613e+06	1.04302e+08	1.30508e+08	1.06618e+08	2.04738e+07	1.13809e+08	2.47476	0.0117236	0.743348	2.5932	Benzenoids	Benzene and substituted derivatives
M165T385_POS	6.82138e+07	8.63372e+07	1.09432e+08	1.59837e+06	4.14453e+07	4.31942e+07	8.79942e+07	2.8746e+07	-1.61405	0.0305693	0.890729	1.9663	Organoheterocyclic compounds	Pyridines and derivatives
M118T243_POS	7.38978e+06	6.24364e+06	7.91254e+06	5.03905e+07	4.18503e+07	7.25249e+07	7.18199e+06	5.49219e+07	2.93493	0.00644749	0.694528	1.873	Organoheterocyclic compounds	Heteroaromatic compounds
M453T36_POS	1.07268e+08	8.40043e+07	8.31783e+07	8.44026e+06	5.37892e+07	5.46562e+07	9.14836e+07	3.89619e+07	-1.23145	0.0377921	0.890729	1.83302	--	--
M350T207_POS	568789	583308	526432	2.55912e+07	4.44451e+07	7.0128e+07	559510	4.67214e+07	6.38378	0.02324	0.890729	1.76654	--	--
M109T35_POS	8.7106e+07	7.26537e+07	6.38782e+07	5.48259e+07	4.17758e+07	3.39697e+07	7.4546e+07	4.35238e+07	-0.776326	0.0270815	0.890729	1.41042	--	--
M216T260_POS	887769	1.83776e+06	998332	2.29523e+07	2.69909e+07	2.20796e+07	1.24129e+06	2.40076e+07	4.27359	0.000122574	0.158174	1.27382	--	--
M330T226_POS	3.74858e+07	2.38336e+07	4.20097e+07	9.18733e+06	1.90702e+07	1.21861e+07	3.4443e+07	1.34812e+07	-1.35326	0.0277211	0.890729	1.25963	Alkaloids and derivatives	Morphinans
M286T200_POS	2.66552e+07	4.18846e+07	4.07759e+07	1.22582e+07	2.45606e+07	1.27665e+07	3.64386e+07	1.65285e+07	-1.14051	0.0348162	0.890729	1.12673	Alkaloids and derivatives	Morphinans
M705T243_2_POS	158000	414429	1.8396e+06	2.10541e+07	1.15434e+07	1.9323e+07	804008	1.73068e+07	4.42799	0.00514201	0.642963	1.09771	Alkaloids and derivatives	Ibogan-type alkaloids
M336T215_POS	944525	832583	2.71525e+06	1.47702e+07	1.0311e+07	2.97395e+07	1.49745e+06	1.82736e+07	3.60918	0.0468718	0.890729	1.06469	Benzenoids	Benzene and substituted derivatives
M121T36_POS	8.85223e+07	8.65219e+07	9.75429e+07	7.69175e+07	7.47832e+07	7.45288e+07	9.08624e+07	7.54098e+07	-0.268931	0.0112571	0.730559	1.06422	Benzenoids	Benzene and substituted derivatives
M135T354_NEG	6.77064e+07	1.44827e+08	1.54691e+08	1.70871e+09	1.71012e+09	1.34164e+09	1.22408e+08	1.58683e+09	3.69637	0.000309724	0.249558	9.98865	Organic oxygen compounds	Organooxygen compounds
M117T412_1_NEG	4.25618e+08	5.17709e+08	6.35767e+08	1.43688e+09	7.90421e+08	1.33243e+09	5.26365e+08	1.18658e+09	1.17267	0.0344125	0.907654	6.22372	Organic acids and derivatives	Carboxylic acids and derivatives
M329T170_NEG	1.7393e+08	1.33916e+08	2.92128e+08	3.42228e+08	3.27658e+08	4.17363e+08	1.99991e+08	3.62417e+08	0.857711	0.0419018	0.907654	2.8334	Lipids and lipid-like molecules	Steroids and steroid derivatives
M147T74_NEG	1.92276e+07	1.80755e+07	2.73704e+07	1.24398e+08	1.05549e+08	2.4135e+08	2.15579e+07	1.57099e+08	2.86539	0.0334231	0.907654	2.79227	Lipids and lipid-like molecules	Fatty Acyls
M311T59_1_NEG	5.44725e+07	4.86936e+07	8.31286e+07	1.21094e+08	1.15704e+08	1.74654e+08	6.20982e+07	1.37151e+08	1.14314	0.0255479	0.907654	2.04358	--	--
M271T52_2_NEG	2.91693e+06	4.56332e+06	4.31207e+06	4.65201e+07	4.62706e+07	6.28753e+07	3.93077e+06	5.18887e+07	3.72254	0.00096456	0.546302	1.79294	Lipids and lipid-like molecules	Fatty Acyls
M359T420_NEG	1.26701e+07	2.6075e+07	3.09123e+07	5.12964e+07	5.1963e+07	3.93675e+07	2.32191e+07	4.75423e+07	1.0339	0.0234518	0.907654	1.19688	--	--
M322T126_NEG	5.9073e+06	1.20663e+07	5.84109e+06	2.34134e+07	3.77181e+07	2.78699e+07	7.93824e+06	2.96671e+07	1.90197	0.00988103	0.889995	1.18367	Organoheterocyclic compounds	Indoles and derivatives
