# Supplementary material for: Phenylpropane biosynthesis and alkaloid metabolism pathways involved in resistance of Amorphophallus spp. against soft rot disease
Source: Front Plant Sci. 2024 Feb 20;15:1334996. doi: 10.3389/fpls.2024.1334996 (PMC10912172; doi:10.3389/fpls.2024.1334996)
Supplement: Supplementary file 9 [file Table_5.xlsx]

## Sheet: Sheet1
Table S5 KJ0 vs KJ24 Pathway enrichment
Pathway	Gene_KJ0-vs-KJ24 (1322)	Gene_All (8922)	Gene_Pvalue	Gene_Qvalue	Metabolite_KJ0-vs-KJ24 (51)	Metabolite_All (449)	Metabolite_Pvalue	Metabolite_Qvalue	Pathway ID	Genes	Metabolites
Metabolic pathways	813	4276	5.35373e-27	6.85278e-25	35	332	0.861075	0.919099	ko01100	C422984444.1(SUS3);C423572454.1(TYDC1);C424385435.1(PMA4);C424466863.1(ZCD);C424716655.1(SAHH);C425008110.1(MS2);C425027950.1(co-1);C425047088.1(AOC);C425203856.1(KCR1);C425304862.1(At3g53190);C425356152.1(AAO);C425445612.1(HTH);C425604208.1(PER25);C425687902.1(ADH2);C425770384.1(ADT6);C425853480.1(SHM4);C425865604.1(ATPD);C425901541.1(FAD2-2);C426007631.1(PGK1);C426025755.1(OPR4);C426089135.1(VH…	M104T393_3_POS(.gamma.-aminobutyric acid);M116T423_POS(2-aminoadipic acid);M105T37_POS(4-methylbenzyl alcohol);M441T225_POS(5-hydroxy-l-tryptophan);M188T359_POS(7-keto-8-aminopelargonic acid);M423T35_POS(7.alpha.-hydroxy-4-cholesten-3-one);M136T181_2_POS(Adenine);M313T194_POS(Aflatoxin b1);M285T155_POS(Biochanin a);M104T287_2_POS(Choline);M112T265_POS(Cytosine);M178T184_POS(D-glucosaminic acid);M…
Biosynthesis of secondary metabolites	476	2308	5.21615e-19	3.33833e-17	19	170	0.59437	0.792493	ko01110	C422984444.1(SUS3);C423572454.1(TYDC1);C424466863.1(ZCD);C425008110.1(MS2);C425027950.1(co-1);C425047088.1(AOC);C425203856.1(KCR1);C425604208.1(PER25);C425687902.1(ADH2);C425770384.1(ADT6);C425853480.1(SHM4);C426007631.1(PGK1);C426025755.1(OPR4);C426263871.1(DHAPS-1);C426280493.1(4CL2);C426388765.1(At1g62810);C426412765.1(HMG3);C426430765.1(CHLH);C426452859.1(PGK3);C426477033.1(AS1);C426494589.1(…	M116T423_POS(2-aminoadipic acid);M136T181_2_POS(Adenine);M313T194_POS(Aflatoxin b1);M285T155_POS(Biochanin a);M337T194_POS(Chlorogenic acid);M87T393_POS(Diacetyl);M132T292_1_POS(DL-isoleucine);M124T348_POS(Nicotinate);M397T180_3_POS(Podophyllotoxin);M365T390_3_POS(Sucrose);M153T25_NEG(2,3-dihydroxybenzoic acid);M337T376_1_NEG(5'-phosphoribosyl-5-amino-4-imidazolecarboxamide (aicar));M425T275_NEG(…
Carbon metabolism	132	567	2.19504e-08	7.02412e-07	1	21	0.925275	0.925275	ko01200	C425853480.1(SHM4);C426007631.1(PGK1);C426452859.1(PGK3);C426795181.1(TKT3);C426813009.1(SHM4);C426823119.1(ME6);C426890349.1(FBA3);C426918217.1(ENO2);C427024489.1(ACX3.2);C427039085.1(FBA2);C427040629.1(FBA1);C427050219.1(PGDH1);C427173259.1(GDH1);C427200730.1(--);C427210110.1(PGDH1);C427220624.1(SAT3);C427337416.1(PGD2);C427355252.1(ACX1);C427404434.1(GDH2);scaffold1006566.2(ACX3);scaffold10368…	M195T404_NEG(D-gluconate)
Alanine, aspartate and glutamate metabolism	38	116	8.17823e-07	1.16313e-05	2	11	0.360992	0.780828	ko00250	C426120353.1(AO);C426865749.1(GS1-2);C427173259.1(GDH1);C427308894.1(ASE1);C427404434.1(GDH2);scaffold1055324.2(GLN2);scaffold1149906.1(GS1-2);scaffold1186935.1(GLN2);scaffold1250556.2(GLN2);scaffold1274872.1(GS1-2);scaffold1306302.1(Gln-gamma);scaffold1346588.1(CARB);scaffold1350072.1(GDH1);scaffold1359328.1(GGAT2);scaffold1363793.1(purB);scaffold1375772.2(GLN1);scaffold1401835.1(GLT1);scaffold1…	M104T393_3_POS(.gamma.-aminobutyric acid);M102T393_NEG(4-Aminobutyric acid(GABA))
Biosynthesis of amino acids	121	552	2.58016e-06	3.19389e-05	5	31	0.268315	0.780828	ko01230	C425008110.1(MS2);C425770384.1(ADT6);C425853480.1(SHM4);C426007631.1(PGK1);C426263871.1(DHAPS-1);C426452859.1(PGK3);C426542185.1(SAMS3);C426779745.1(TYRAAT2);C426795181.1(TKT3);C426813009.1(SHM4);C426816785.1(METK1);C426865749.1(GS1-2);C426890349.1(FBA3);C426918217.1(ENO2);C426958951.1(ADT6);C426983237.1(AAT);C427039085.1(FBA2);C427040629.1(FBA1);C427050219.1(PGDH1);C427169061.1(SAMS);C427200730.…	M116T423_POS(2-aminoadipic acid);M132T292_1_POS(DL-isoleucine);M163T350_NEG(DL-tyrosine);M129T57_NEG(Ketoleucine);M188T414_NEG(N-acetyl-l-glutamate)
Isoquinoline alkaloid biosynthesis	22	58	1.25915e-05	0.000123978	1	11	0.738741	0.83631	ko00950	C423572454.1(TYDC1);C425027950.1(co-1);C426388765.1(At1g62810);C426477033.1(AS1);C426550835.1(PPO);C426983237.1(AAT);C427092303.1(co-1);C427146523.1(At1g62810);C427369764.1(N4OMT);scaffold1241630.1(AAT);scaffold1255001.1(CYP719A13);scaffold1329023.1(co-2);scaffold1410077.1(Os01g0760600);scaffold1458156.1(Os01g0760600);scaffold175902.1(TYDC2);scaffold440888.1(AO1);scaffold635572.1(Os01g0760600);sc…	M163T350_NEG(DL-tyrosine)
Cysteine and methionine metabolism	57	234	6.71949e-05	0.000614353	1	11	0.738741	0.83631	ko00270	C424716655.1(SAHH);C425008110.1(MS2);C426542185.1(SAMS3);C426816785.1(METK1);C426855361.1(SAMDC);C427038565.1(ACO2);C427050219.1(PGDH1);C427169061.1(SAMS);C427210110.1(PGDH1);C427220624.1(SAT3);C427261736.1(SAHH);C427292220.1(SAHH);C427354870.1(SAMDC);C427381344.1(ACO);scaffold1014693.1(At3g26115);scaffold1071739.1(ACO);scaffold1082051.1(RCS1);scaffold1087905.1(METK1);scaffold1131295.1(ISS1);scaf…	M298T96_POS(S-methyl-5'-thioadenosine)
Amino sugar and nucleotide sugar metabolism	60	266	0.000417824	0.00314597	1	18	0.890867	0.919099	ko00520	C426464697.1(ChiC);C426594413.1(CSLD5);C426615745.1(MUR1);C426717199.1(SQD1);C426886891.1(GAE1);C426912747.1(CSLD5);C426967285.1(Cht5);C427108391.1(CSLD5);C427152375.1(MUR1);C427223492.1(OsI_032456);scaffold103161.1(UGE-1);scaffold1066140.1(--);scaffold1100426.1(PGM1);scaffold1169180.1(UPTG2);scaffold118419.1(GAUT6);scaffold1220026.1(HEXO1);scaffold1262275.1(Cht4);scaffold1290720.1(AGPL1);scaffol…	M241T425_1_NEG(.alpha.-d-galactose 1-phosphate)
Ubiquinone and other terpenoid-quinone biosynthesis	23	79	0.000806592	0.00513962	1	7	0.572607	0.780828	ko00130	C426280493.1(4CL2);C426622369.1(4CL1);C426753517.1(CYP73A1);C427243820.1(CYP73A16);C427344540.1(CYP73A12);scaffold1063757.1(ARSM2);scaffold1317237.1(CYP73A16);scaffold1329988.1(VTE3);scaffold1330045.1(4CL1);scaffold1424870.1(ICS2);scaffold1448731.1(AAE14);scaffold1496143.1(VTE4);scaffold170000.1(CYP73A1);scaffold330207.1(DHNAT1);scaffold433849.1(CYP73A4);scaffold497977.1(HPT1);scaffold519534.1(VT…	M163T350_NEG(DL-tyrosine)
beta-Alanine metabolism	24	84	0.00084322	0.00513962	2	10	0.316852	0.780828	ko00410	C426388765.1(At1g62810);C426864389.1(PAO4);C427024489.1(ACX3.2);C427146523.1(At1g62810);C427355252.1(ACX1);scaffold1006566.2(ACX3);scaffold1113732.1(PYD3);scaffold1139197.1(ACX3);scaffold1256270.1(BTG-26);scaffold1273478.1(PAO6);scaffold1334990.1(ALDH7B4);scaffold1346600.1(ALDH3F1);scaffold1394142.1(PAO5);scaffold1423806.1(ALDH2B7);scaffold1481438.1(MPAO1);scaffold235352.1(ACX2);scaffold329668.3(…	M104T393_3_POS(.gamma.-aminobutyric acid);M102T393_NEG(4-Aminobutyric acid(GABA))
Phenylalanine, tyrosine and tryptophan biosynthesis	26	94	0.000894123	0.00520217	1	6	0.517003	0.780828	ko00400	C425770384.1(ADT6);C426263871.1(DHAPS-1);C426779745.1(TYRAAT2);C426958951.1(ADT6);C426983237.1(AAT);C427292012.1(ADT6);C427352946.1(EMB3004);scaffold1034639.1(TSB1);scaffold1118024.1(OsASA2);scaffold1241630.1(AAT);scaffold1246833.1(TSA1);scaffold1333925.1(ADT6);scaffold1387875.1(--);scaffold1410077.1(Os01g0760600);scaffold1458156.1(Os01g0760600);scaffold1472233.1(TYRAAT1);scaffold1479584.1(ASA2);…	M163T350_NEG(DL-tyrosine)
Biotin metabolism	20	68	0.00150593	0.00838081	1	4	0.38369	0.780828	ko00780	C426147525.1(BIOF);C426181183.1(fabZ);C426285625.1(KAS12);C426927565.1(fabZ);scaffold1081017.1(BIOF);scaffold1124454.1(At3g03980);scaffold1124454.2(At3g03980);scaffold125208.1(BIOF);scaffold139211.1(--);scaffold1449325.1(--);scaffold1452635.1(KAS12);scaffold1501264.1(Os08g0327400);scaffold221252.1(BIOF);scaffold262336.1(BIOF);scaffold287565.1(BIOF);scaffold295620.1(BIOF);scaffold393213.1(KAS12);s…	M188T359_POS(7-keto-8-aminopelargonic acid)
Tyrosine metabolism	26	98	0.0017342	0.00924909	1	19	0.90378	0.919099	ko00350	C423572454.1(TYDC1);C425027950.1(co-1);C425687902.1(ADH2);C426388765.1(At1g62810);C426477033.1(AS1);C426550835.1(PPO);C426983237.1(AAT);C427092303.1(co-1);C427146523.1(At1g62810);C427332016.1(ADH1);scaffold1207288.1(ADH1);scaffold1241630.1(AAT);scaffold1329023.1(co-2);scaffold1353067.1(At5g42250);scaffold1356347.1(At5g24760);scaffold1410077.1(Os01g0760600);scaffold1458156.1(Os01g0760600);scaffold…	M163T350_NEG(DL-tyrosine)
Pentose phosphate pathway	28	111	0.0026558	0.0135977	3	12	0.145382	0.581528	ko00030	C426795181.1(TKT3);C426890349.1(FBA3);C427039085.1(FBA2);C427040629.1(FBA1);C427200730.1(--);C427337416.1(PGD2);scaffold1100426.1(PGM1);scaffold1237554.1(G6PD1);scaffold1295942.1(FBA3);scaffold1403038.1(PFP-ALPHA);scaffold140436.1(PGM1);scaffold1429501.1(TKL-1);scaffold1465576.1(FBA5);scaffold1466955.1(FBA3);scaffold1492694.1(GOX1709);scaffold244995.1(PFK3);scaffold244995.2(PFK7);scaffold29026.1(…	M178T184_POS(D-glucosaminic acid);M427T459_NEG(2-deoxyribose 5-phosphate);M195T404_NEG(D-gluconate)
Glycine, serine and threonine metabolism	35	149	0.00311771	0.0153487	1	11	0.738741	0.83631	ko00260	C425445612.1(HTH);C425853480.1(SHM4);C426388765.1(At1g62810);C426813009.1(SHM4);C427050219.1(PGDH1);C427146523.1(At1g62810);C427210110.1(PGDH1);scaffold1034639.1(TSB1);scaffold1041329.1(GLYK);scaffold1208499.1(SHM2);scaffold1237475.1(HSK);scaffold1246833.1(TSA1);scaffold1256270.1(BTG-26);scaffold1334990.1(ALDH7B4);scaffold1358333.1(PGM1);scaffold1359328.1(GGAT2);scaffold1389115.1(GDCSP);scaffold1…	M104T287_2_POS(Choline)
Valine, leucine and isoleucine degradation	21	80	0.0052746	0.0241125	2	2	0.012677	0.25354	ko00280	C427344960.1(At5g09300);C427412254.1(HMGCL);scaffold1198562.1(At5g47720);scaffold1209214.1(Os05g0125500);scaffold1246484.1(PED1);scaffold1256270.1(BTG-26);scaffold1293320.1(HMGS);scaffold1316935.1(IBR3);scaffold1334990.1(ALDH7B4);scaffold1346600.1(ALDH3F1);scaffold1423806.1(ALDH2B7);scaffold1467006.1(AAT1);scaffold212982.1(IBR3);scaffold215188.2(BCDH);scaffold301620.1(PED1);scaffold399267.1(AGT2)…	M132T292_1_POS(DL-isoleucine);M129T57_NEG(Ketoleucine)
Glutathione metabolism	33	145	0.00670933	0.027703	1	6	0.517003	0.780828	ko00480	C426476841.1(GSTF11);C427030907.1(--);C427337416.1(PGD2);scaffold1053271.1(DHAR1);scaffold1161766.1(GSTF8);scaffold1168003.1(Os08g0562700);scaffold1169869.1(CICDH);scaffold1237554.1(G6PD1);scaffold1417258.1(GPX1);scaffold1426001.1(ICDH-1);scaffold1449869.1(GSTL2);scaffold1479679.1(GPX3);scaffold21294.1(APXT);scaffold21294.3(APXS);scaffold243895.1(CLEB3J9);scaffold260690.1(MPA1);scaffold308901.1(G…	M173T143_NEG(Dehydroascorbic acid)
Arginine biosynthesis	22	91	0.0120891	0.0442116	1	6	0.517003	0.780828	ko00220	C426865749.1(GS1-2);C427173259.1(GDH1);C427404434.1(GDH2);scaffold1055324.2(GLN2);scaffold1149906.1(GS1-2);scaffold1186935.1(GLN2);scaffold1250556.2(GLN2);scaffold1274872.1(GS1-2);scaffold1306302.1(Gln-gamma);scaffold1350072.1(GDH1);scaffold1359328.1(GGAT2);scaffold1375772.2(GLN1);scaffold1410077.1(Os01g0760600);scaffold1454094.1(GS1-1);scaffold1458156.1(Os01g0760600);scaffold635572.1(Os01g076060…	M188T414_NEG(N-acetyl-l-glutamate)
Thiamine metabolism	15	56	0.0140272	0.0498747	1	7	0.572607	0.780828	ko00730	C426815281.1(TH2);scaffold1168012.1(At2g39270);scaffold1201261.1(TKT2);scaffold1274230.1(THI1-2);scaffold1467163.1(At2g39270);scaffold1467163.2(ADK);scaffold1481308.1(Os07g0190000);scaffold1493269.1(THIC);scaffold219165.1(rsgA);scaffold353464.1(At5g35170);scaffold41754.2(Os12g0192500);scaffold79226.1(DXS);scaffold888527.1(ADK);scaffold943999.1(Os08g0109300);MSTRG.32352(TH2)	M163T350_NEG(DL-tyrosine)
Phenylpropanoid biosynthesis	43	211	0.0165154	0.0571345	3	10	0.0932668	0.545644	ko00940	C425604208.1(PER25);C426280493.1(4CL2);C426494589.1(PAL);C426566143.1(TOGT1);C426622369.1(4CL1);C426753517.1(CYP73A1);C426945261.1(PER25);C426966535.1(PNC2);C427243820.1(CYP73A16);C427298622.1(CSE);C427344540.1(CYP73A12);C427356216.1(N4OMT);scaffold1022487.2(PER12);scaffold1031791.1(BGLU6);scaffold1191157.1(HST);scaffold1259417.1(GSVIVT00037159001);scaffold1264835.1(Os07g0638300);scaffold1264886.…	M337T194_POS(Chlorogenic acid);M163T350_NEG(DL-tyrosine);M149T322_1_NEG(P-coumaryl alcohol)
Starch and sucrose metabolism	62	331	0.0273983	0.0858711	1	7	0.572607	0.780828	ko00500	C422984444.1(SUS3);C426604311.1(GLU3);C426897363.1(GLU3);C426976147.1(SUS1);C427035351.1(AMY2);C427414358.1(TPPG);scaffold1020641.1(SPS5);scaffold1031791.1(BGLU6);scaffold1095376.1(--);scaffold1100426.1(PGM1);scaffold1133930.1(DPEP);scaffold1172529.1(ISA1);scaffold1203951.1(SS2);scaffold1231971.1(SUS3);scaffold1260868.1(GLU12);scaffold1264886.1(BGLU18);scaffold1278416.1(SUS3);scaffold128328.1(AMY…	M365T390_3_POS(Sucrose)
Arginine and proline metabolism	24	109	0.0275056	0.0858711	3	12	0.145382	0.581528	ko00330	C426855361.1(SAMDC);C426864389.1(PAO4);C427354870.1(SAMDC);scaffold1235587.1(P4H3);scaffold1256270.1(BTG-26);scaffold1273478.1(PAO6);scaffold1291776.1(OAT);scaffold1310999.1(POX1);scaffold1334990.1(ALDH7B4);scaffold1339476.1(At4g34880);scaffold1346600.1(ALDH3F1);scaffold1394142.1(PAO5);scaffold1410077.1(Os01g0760600);scaffold1423806.1(ALDH2B7);scaffold1440159.1(At4g34880);scaffold1458156.1(Os01g0…	M104T393_3_POS(.gamma.-aminobutyric acid);M146T378_1_POS(G-guanidinobutyrate);M102T393_NEG(4-Aminobutyric acid(GABA))
Tryptophan metabolism	22	100	0.0340704	0.101419	1	15	0.841061	0.917521	ko00380	C423572454.1(TYDC1);C427319334.1(CYP78A9);scaffold110524.1(At4g26910);scaffold1131295.1(ISS1);scaffold1198562.1(At5g47720);scaffold1256270.1(BTG-26);scaffold1291601.1(TAR2);scaffold1334990.1(ALDH7B4);scaffold1339476.1(At4g34880);scaffold1346600.1(ALDH3F1);scaffold1423806.1(ALDH2B7);scaffold1440159.1(At4g34880);scaffold1443427.1(SNAT2);scaffold1448183.1(CAT2);scaffold1463767.1(CYP89A9);scaffold146…	M441T225_POS(5-hydroxy-l-tryptophan)
Phenylalanine metabolism	18	79	0.0380529	0.108239	1	9	0.665645	0.83631	ko00360	C423572454.1(TYDC1);C426388765.1(At1g62810);C426494589.1(PAL);C426983237.1(AAT);C427146523.1(At1g62810);scaffold1241630.1(AAT);scaffold1339476.1(At4g34880);scaffold1410077.1(Os01g0760600);scaffold1440159.1(At4g34880);scaffold1458156.1(Os01g0760600);scaffold1480892.1(AMI1);scaffold175902.1(TYDC2);scaffold346087.2(--);scaffold440888.1(AO1);scaffold635572.1(Os01g0760600);scaffold645663.1(Os01g076060…	M163T350_NEG(DL-tyrosine)
ABC transporters	19	85	0.0402887	0.109722	3	31	0.709482	0.83631	ko02010	C426788769.1(ABCC3);C427075483.1(ABCB21);C427194289.1(ABCC8);scaffold1305343.2(ABCB11);scaffold1305343.4(ABCB11);scaffold1360302.1(ABCC13);scaffold1447839.1(ABCB2);scaffold1468027.1(ABCC3);scaffold1478547.1(ABCB4);scaffold234074.1(ABCB4);scaffold315997.1(ABCC3);scaffold412042.1(ABCB28);scaffold416727.1(ABCC10);scaffold471151.1(ABCC8);scaffold631491.1(ABCC10);scaffold666737.1(ABCB12);scaffold71941…	M104T287_2_POS(Choline);M132T292_1_POS(DL-isoleucine);M365T390_3_POS(Sucrose)
Stilbenoid, diarylheptanoid and gingerol biosynthesis	12	48	0.04364	0.116373	1	5	0.454323	0.780828	ko00945	C426753517.1(CYP73A1);C427243820.1(CYP73A16);C427344540.1(CYP73A12);C427356216.1(N4OMT);scaffold1191157.1(HST);scaffold1314822.1(CYP98A2);scaffold1317237.1(CYP73A16);scaffold170000.1(CYP73A1);scaffold360666.1(ROMT);scaffold433849.1(CYP73A4);scaffold65292.1(CCOAOMT1);MSTRG.20678(CCOMT)	M337T194_POS(Chlorogenic acid)
Tropane, piperidine and pyridine alkaloid biosynthesis	11	45	0.0600947	0.150826	2	8	0.227405	0.780828	ko00960	C426388765.1(At1g62810);C426983237.1(AAT);C427146523.1(At1g62810);scaffold1241630.1(AAT);scaffold1410077.1(Os01g0760600);scaffold1458156.1(Os01g0760600);scaffold440888.1(AO1);scaffold635572.1(Os01g0760600);scaffold645663.1(Os01g0760600);scaffold810519.1(--);scaffold912257.1(AAT)	M132T292_1_POS(DL-isoleucine);M124T348_POS(Nicotinate)
Ascorbate and aldarate metabolism	23	116	0.0847459	0.200879	3	15	0.236573	0.780828	ko00053	C425356152.1(AAO);C427030907.1(--);C427147923.1(VTC5);C427175009.1(Bp10);C427223492.1(OsI_032456);C427315388.1(VTC2);scaffold1053271.1(DHAR1);scaffold1256270.1(BTG-26);scaffold1334990.1(ALDH7B4);scaffold1346600.1(ALDH3F1);scaffold1400335.1(UGD4);scaffold1423806.1(ALDH2B7);scaffold1495631.1(AAO);scaffold21294.1(APXT);scaffold21294.3(APXS);scaffold243895.1(CLEB3J9);scaffold452813.1(UGD4);scaffold71…	M191T372_NEG(D-glucarate);M173T143_NEG(Dehydroascorbic acid);M209T373_NEG(Mucic acid)
Ether lipid metabolism	13	61	0.108531	0.248071	1	1	0.113586	0.545644	ko00565	C427271756.1(PLDBETA1);C427388998.1(SDP1);scaffold1173549.1(NPC2);scaffold1217858.1(SDP1);scaffold1223621.1(PLDBETA1);scaffold1270853.1(PLDBETA1);scaffold1332299.1(SDP1);scaffold1413253.1(LPLAT1);scaffold1458332.1(PLDBETA1);scaffold206068.1(NPC2);scaffold377219.1(NPC6);scaffold517146.1(NPC2);MSTRG.19011(AAPT1)	M258T407_2_POS(Glycerophosphocholine)
Purine metabolism	37	209	0.138555	0.295584	2	21	0.713553	0.83631	ko00230	C427136671.1(PUR2);C427171367.1(RSH2);C427181861.1(hpt);C427308894.1(ASE1);C427417810.1(AMPD);scaffold1100426.1(PGM1);scaffold1135090.1(IMPDH);scaffold1168012.1(At2g39270);scaffold1230683.1(At4g26390);scaffold1288854.1(RSH2);scaffold1289998.1(XDH);scaffold1295050.1(CRSH);scaffold1363793.1(purB);scaffold1377126.1(hpt);scaffold1379534.1(NUDT23);scaffold1381193.1(AAK6);scaffold1402319.1(XDH2);scaffo…	M136T181_2_POS(Adenine);M337T376_1_NEG(5'-phosphoribosyl-5-amino-4-imidazolecarboxamide (aicar))
Nicotinate and nicotinamide metabolism	9	42	0.15972	0.33515	4	14	0.0625182	0.545644	ko00760	C426120353.1(AO);C427354852.1(QS);scaffold1502180.1(--);scaffold30045.1(URH1);scaffold399293.1(Os11g0191400);scaffold577805.1(--);scaffold676836.1(Os02g0134400);scaffold853233.1(Os01g0957000);MSTRG.15014(--)	M104T393_3_POS(.gamma.-aminobutyric acid);M124T348_POS(Nicotinate);M138T310_3_POS(Trigonelline);M102T393_NEG(4-Aminobutyric acid(GABA))
Galactose metabolism	23	129	0.196613	0.393226	2	11	0.360992	0.780828	ko00052	C426244921.1(RFS6);C427416032.1(STS1);scaffold103161.1(UGE-1);scaffold1100426.1(PGM1);scaffold1154308.1(AGAL2);scaffold1318219.1(RFS);scaffold140436.1(PGM1);scaffold1460702.1(RFS6);scaffold1482459.1(RFS2);scaffold153825.1(UGE2);scaffold244995.1(PFK3);scaffold244995.2(PFK7);scaffold393262.1(UGE-1);scaffold399376.1(UGE5);scaffold452064.1(UGE5);scaffold464599.1(PGMP);scaffold576388.1(RFS2);scaffold8…	M365T390_3_POS(Sucrose);M241T425_1_NEG(.alpha.-d-galactose 1-phosphate)
Cyanoamino acid metabolism	17	94	0.221994	0.437156	2	5	0.101157	0.545644	ko00460	C425853480.1(SHM4);C426813009.1(SHM4);scaffold1031791.1(BGLU6);scaffold1208499.1(SHM2);scaffold1264886.1(BGLU18);scaffold230252.2(BGLU44);scaffold353795.1(BGLU12);scaffold378640.1(bglX);scaffold455866.1(BGLU12);scaffold45803.1(SHM2);scaffold768011.2(CYSC);scaffold774767.1(bglH);scaffold81774.1(BGLU12);scaffold852074.1(BGLU24);scaffold996514.1(At3g16150);scaffold996514.2(At3g16150);MSTRG.12491(BGL…	M132T292_1_POS(DL-isoleucine);M163T350_NEG(DL-tyrosine)
Flavonoid biosynthesis	15	84	0.256293	0.489635	2	16	0.560903	0.780828	ko00941	C426513463.1(CHSA);C426753517.1(CYP73A1);C427243820.1(CYP73A16);C427344540.1(CYP73A12);C427356216.1(N4OMT);scaffold1191157.1(HST);scaffold1278905.1(CHS1);scaffold1314822.1(CYP98A2);scaffold1317237.1(CYP73A16);scaffold1368530.1(CHI3);scaffold170000.1(CYP73A1);scaffold433849.1(CYP73A4);scaffold605521.1(UGT88F5);scaffold65292.1(CCOAOMT1);MSTRG.20678(CCOMT)	M337T194_POS(Chlorogenic acid);M269T44_NEG(Apigenin)
Butanoate metabolism	7	37	0.303826	0.540134	3	11	0.118223	0.545644	ko00650	C427412254.1(HMGCL);scaffold1198562.1(At5g47720);scaffold1293320.1(HMGS);scaffold1467006.1(AAT1);scaffold329668.3(GAD4);scaffold434132.1(GLYR2);scaffold529427.1(HMGCL)	M104T393_3_POS(.gamma.-aminobutyric acid);M87T393_POS(Diacetyl);M102T393_NEG(4-Aminobutyric acid(GABA))
Aminoacyl-tRNA biosynthesis	23	143	0.368698	0.637749	2	4	0.0653934	0.545644	ko00970	scaffold1108578.1(--);scaffold1181200.1(EMB2369);scaffold1243608.1(GATA);scaffold1266539.1(GATB);scaffold1333568.1(OsI_22356);scaffold1337977.1(EMB2247);scaffold1384958.1(IBI1);scaffold1450224.1(At3g46100);scaffold1487714.1(At3g46100);scaffold1492953.1(GATB);scaffold175039.1(EMB2369);scaffold248253.1(OVA7);scaffold350036.1(OVA1);scaffold578782.1(EMB2761);scaffold686442.1(At4g33760);scaffold810114…	M132T292_1_POS(DL-isoleucine);M163T350_NEG(DL-tyrosine)
2-Oxocarboxylic acid metabolism	24	156	0.454971	0.736175	5	17	0.0332956	0.399547	ko01210	scaffold1077824.1(CIT);scaffold1169869.1(CICDH);scaffold1255140.1(CSY2);scaffold1268637.1(CSY2);scaffold1311573.1(IDH1);scaffold1359328.1(GGAT2);scaffold1410077.1(Os01g0760600);scaffold1426001.1(ICDH-1);scaffold1458156.1(Os01g0760600);scaffold1489417.1(Os08g0191100);scaffold1489417.2(ACO3);scaffold372316.1(At3g58610);scaffold400830.1(Os08g0191100);scaffold544662.1(CICDH);scaffold625826.1(AK1);sca…	M116T423_POS(2-aminoadipic acid);M132T292_1_POS(DL-isoleucine);M163T350_NEG(DL-tyrosine);M129T57_NEG(Ketoleucine);M188T414_NEG(N-acetyl-l-glutamate)
Histidine metabolism	6	37	0.474753	0.750227	2	11	0.360992	0.780828	ko00340	scaffold1089524.1(HISN3);scaffold1256270.1(BTG-26);scaffold1334990.1(ALDH7B4);scaffold1346600.1(ALDH3F1);scaffold1423806.1(ALDH2B7);scaffold719541.1(ALDH3F1)	M154T66_POS(N-acetylhistamine);M337T376_1_NEG(5'-phosphoribosyl-5-amino-4-imidazolecarboxamide (aicar))
Lysine degradation	10	64	0.481118	0.751014	2	10	0.316852	0.780828	ko00310	scaffold110524.1(At4g26910);scaffold1198562.1(At5g47720);scaffold1256270.1(BTG-26);scaffold1334990.1(ALDH7B4);scaffold1346600.1(ALDH3F1);scaffold1423806.1(ALDH2B7);scaffold1463991.1(At4g26910);scaffold1467006.1(AAT1);scaffold484169.1(ASHR1);scaffold719541.1(ALDH3F1)	M116T423_POS(2-aminoadipic acid);M147T418_NEG(L-2-hydroxyglutaric acid)
Indole alkaloid biosynthesis	2	12	0.549525	0.813013	1	6	0.517003	0.780828	ko00901	C423572454.1(TYDC1);scaffold175902.1(TYDC2)	M215T347_POS(Harmaline)
Betalain biosynthesis	2	18	0.769948	1	1	4	0.38369	0.780828	ko00965	C423572454.1(TYDC1);scaffold175902.1(TYDC2)	M163T350_NEG(DL-tyrosine)
Flavone and flavonol biosynthesis	1	13	0.875861	1	6	13	0.00148462	0.089077	ko00944	C427123807.1(RT)	M579T234_2_POS(2-o-rhamnosylvitexin);M285T129_POS(Acacetin);M565T263_3_POS(Apiin);M269T44_NEG(Apigenin);M431T191_1_NEG(Isovitexin);M577T234_4_NEG(Rhoifolin)
Lysine biosynthesis	3	34	0.89808	1	1	5	0.454323	0.780828	ko00300	scaffold1236260.1(AGD2);scaffold625826.1(AK1);MSTRG.33202(AKHSDH1)	M116T423_POS(2-aminoadipic acid)
Zeatin biosynthesis	2	29	0.94253	1	2	13	0.445881	0.780828	ko00908	scaffold1307990.1(CKX3);scaffold1307990.2(CKX6)	M136T181_2_POS(Adenine);M298T96_POS(S-methyl-5'-thioadenosine)
Valine, leucine and isoleucine biosynthesis	3	43	0.964089	1	2	5	0.101157	0.545644	ko00290	scaffold372316.1(At3g58610);scaffold822646.1(Os05g0573700);MSTRG.26128(DHAD)	M132T292_1_POS(DL-isoleucine);M129T57_NEG(Ketoleucine)
Monobactam biosynthesis	2	33	0.966322	1	1	4	0.38369	0.780828	ko00261	scaffold625826.1(AK1);MSTRG.33202(AKHSDH1)	M163T350_NEG(DL-tyrosine)
Glycerophospholipid metabolism	20	203	0.986418	1	2	8	0.227405	0.780828	ko00564	C427271756.1(PLDBETA1);C427388998.1(SDP1);scaffold1173549.1(NPC2);scaffold1217858.1(SDP1);scaffold1223621.1(PLDBETA1);scaffold1254756.1(NMT2);scaffold1270853.1(PLDBETA1);scaffold1329310.1(LCAT1);scaffold1332299.1(SDP1);scaffold1413253.1(LPLAT1);scaffold1456826.1(PLSC);scaffold1458332.1(PLDBETA1);scaffold1499531.1(GPAT4);scaffold206068.1(NPC2);scaffold377219.1(NPC6);scaffold517146.1(NPC2);scaffold…	M104T287_2_POS(Choline);M258T407_2_POS(Glycerophosphocholine)
Pyrimidine metabolism	8	130	0.999397	1	1	19	0.90378	0.919099	ko00240	C426299789.1(CDA1);C426891239.1(TK);scaffold1113732.1(PYD3);scaffold1346588.1(CARB);scaffold1451711.1(pyrH);scaffold30045.1(URH1);scaffold361016.1(PYD2);scaffold362527.1(DCTPP1)	M112T265_POS(Cytosine)

## Sheet: Sheet2
Table S5 KJ0 vs KJ48 Pathway enrichment
Pathway	Gene_KJ0-vs-KJ48 (1779)	Gene_All (8922)	Gene_Pvalue	Gene_Qvalue	Metabolite_KJ0-vs-KJ48 (64)	Metabolite_All (449)	Metabolite_Pvalue	Metabolite_Qvalue	Pathway ID	Genes	K_IDs	Metabolites
Metabolic pathways	1092	4276	3.04355e-37	3.98705e-35	48	332	0.485365	0.684711	ko01100	C423572454.1(TYDC1);C424105226.1(PME17);C424385435.1(PMA4);C424716655.1(SAHH);C424979486.1(PECS-2.1);C425008110.1(MS2);C425027950.1(co-1);C425034308.1(LOX4);C425047088.1(AOC);C425203856.1(KCR1);C425356152.1(AAO);C425434528.1(--);C425445612.1(HTH);C425486526.1(Os12g0615400);C425498324.1(Os03g0815200);C425604208.1(PER25);C425687902.1(ADH2);C425770384.1(ADT6);C425772952.1(4CLL1);C425853480.1(SHM4);C…	K01593+K01051+K01535+K01251+K01051+K00549+K00422+K00454+K10525+K10251+K00423+K04713+K00108+K12502+K00297+K00430+K18857+K05359+K01904+K00600+K02113+K10256+K00128+K00927+K05894+K02155+K03635+K00278+K00652+K02372+K01692+K01051+K06617+K01626+K01904+K09458+K06118+K01489+K01535+K01674+K00276+K13065+K00021+K02641+K03403+K00927+K03921+K01183+K01692+K00422+K04708+K10775+K13789+K08909+K00789+K00422+K00770+…	M104T393_3_POS(.gamma.-aminobutyric acid);M116T423_POS(2-aminoadipic acid);M287T150_POS(4-androsten-3,17-dione);M105T37_POS(4-methylbenzyl alcohol);M441T225_POS(5-hydroxy-l-tryptophan);M134T61_POS(5-methylbenzotriazole);M188T359_POS(7-keto-8-aminopelargonic acid);M423T35_POS(7.alpha.-hydroxy-4-cholesten-3-one);M136T181_2_POS(Adenine);M313T194_POS(Aflatoxin b1);M285T155_POS(Biochanin a);M104T287_2…
Biosynthesis of secondary metabolites	626	2308	7.92081e-23	5.18813e-21	24	170	0.577544	0.702597	ko01110	C423572454.1(TYDC1);C425008110.1(MS2);C425027950.1(co-1);C425034308.1(LOX4);C425047088.1(AOC);C425203856.1(KCR1);C425486526.1(Os12g0615400);C425604208.1(PER25);C425687902.1(ADH2);C425770384.1(ADT6);C425772952.1(4CLL1);C425853480.1(SHM4);C425981847.1(ALDH3F1);C426007631.1(PGK1);C426025755.1(OPR4);C426185585.1(ECHIA);C426263871.1(DHAPS-1);C426280493.1(4CL2);C426388765.1(At1g62810);C426399775.1(HST)…	K01593+K00549+K00422+K00454+K10525+K10251+K12502+K00430+K18857+K05359+K01904+K00600+K00128+K00927+K05894+K01692+K01626+K01904+K00276+K13065+K00021+K03403+K00927+K01692+K00422+K10775+K13789+K00789+K00422+K23260+K00021+K01904+K14595+K00276+K11517+K15397+K00487+K15227+K00615+K00600+K00789+K02437+K01623+K15747+K00430+K05894+K05359+K01602+K00430+K15849+K00232+K01176+K15404+K05933+K01623+K01623+K02291+…	M116T423_POS(2-aminoadipic acid);M136T181_2_POS(Adenine);M313T194_POS(Aflatoxin b1);M285T155_POS(Biochanin a);M337T194_POS(Chlorogenic acid);M87T393_POS(Diacetyl);M132T292_1_POS(DL-isoleucine);M124T348_POS(Nicotinate);M397T180_3_POS(Podophyllotoxin);M365T390_3_POS(Sucrose);M213T191_NEG(1-Deoxy-D-xylulose 5-phosphate);M153T25_NEG(2,3-dihydroxybenzoic acid);M337T376_1_NEG(5'-phosphoribosyl-5-amino-…
Carbon metabolism	167	567	1.41177e-08	3.69884e-07	3	21	0.59749	0.702597	ko01200	C425498324.1(Os03g0815200);C425853480.1(SHM4);C426007631.1(PGK1);C426452859.1(PGK3);C426680381.1(GLO1);C426795181.1(TKT3);C426813009.1(SHM4);C426823119.1(ME6);C426858023.1(GDCSH);C426890349.1(FBA3);C426961719.1(SSU5A);C427024489.1(ACX3.2);C427039085.1(FBA2);C427040629.1(FBA1);C427050219.1(PGDH1);C427173259.1(GDH1);C427182223.1(PDH-E1);C427200730.1(--);C427210110.1(PGDH1);C427220624.1(SAT3);C42726…	K00297+K00600+K00927+K00927+K11517+K00615+K00600+K00029+K02437+K01623+K01602+K00232+K01623+K01623+K00058+K00261+K00161+K01623+K00058+K00640+K00131+K00033+K00232+K00261+K00232+K15633+K05298+K01623+K15918+K00164+K01006+K01006+K00134+K00134+K01647+K01738+K00162+K00036+K00658+K00232+K00627+K00031+K00161+K00161+K00626+K00600+K00844+K00873+K00036+K00164+K00297+K01647+K01647+K01623+K19269+K00850+K01595+…	M195T404_NEG(D-gluconate);M87T145_NEG(Pyruvate);M117T412_1_NEG(Succinate)
Alanine, aspartate and glutamate metabolism	48	116	8.84307e-08	1.93074e-06	4	11	0.0569463	0.264633	ko00250	C426120353.1(AO);C426865749.1(GS1-2);C427173259.1(GDH1);C427219882.1(CARB);C427282186.1(GAD);C427308894.1(ASE1);C427404434.1(GDH2);scaffold1055324.2(GLN2);scaffold1081732.1(At3g16150);scaffold1149906.1(GS1-2);scaffold1177695.2(GAD);scaffold1186935.1(GLN2);scaffold1250556.2(GLN2);scaffold1274872.1(GS1-2);scaffold1306302.1(Gln-gamma);scaffold1346521.1(GDH1);scaffold1346588.1(CARB);scaffold1350072.1…	K00278+K01915+K00261+K01955+K01580+K00764+K00261+K01915+K13051+K01915+K01580+K01915+K01915+K01915+K01915+K00261+K01955+K00261+K13051+K14272+K01756+K01915+K00264+K14454+K13051+K01915+K14454+K00820+K01953+K01580+K00827+K00830+K01939+K14454+K14454+K00830+K00830+K00278+K14454+K00827+K00827+K00814+K01956+K14272+K13051+K13051+K01915+K00827	M104T393_3_POS(.gamma.-aminobutyric acid);M102T393_NEG(4-Aminobutyric acid(GABA));M87T145_NEG(Pyruvate);M117T412_1_NEG(Succinate)
Ubiquinone and other terpenoid-quinone biosynthesis	36	79	2.08869e-07	3.42023e-06	1	7	0.661866	0.736443	ko00130	C425486526.1(Os12g0615400);C425772952.1(4CLL1);C426280493.1(4CL2);C426622369.1(4CL1);C426753517.1(CYP73A1);C427243820.1(CYP73A16);C427344540.1(CYP73A12);scaffold1063757.1(ARSM2);scaffold1134048.1(At4g36750);scaffold1277955.1(HPT2);scaffold1317237.1(CYP73A16);scaffold1329988.1(VTE3);scaffold1330045.1(4CL1);scaffold1373007.1(NAAT1);scaffold1424870.1(ICS2);scaffold1448731.1(AAE14);scaffold1482295.1(…	K12502+K01904+K01904+K01904+K00487+K00487+K00487+K12502+K03809+K12501+K00487+K12502+K01904+K00815+K02552+K14760+K05928+K05928+K00487+K19222+K19222+K12501+K00487+K09833+K05928+K12502+K05928+K01661+K03809+K12502+K17872+K23095+K05928+K05928+K01904+K01904	M163T350_NEG(DL-tyrosine)
Carbon fixation in photosynthetic organisms	58	160	9.64728e-07	1.40422e-05	1	5	0.538202	0.697015	ko00710	C426007631.1(PGK1);C426452859.1(PGK3);C426795181.1(TKT3);C426823119.1(ME6);C426890349.1(FBA3);C426961719.1(SSU5A);C427039085.1(FBA2);C427040629.1(FBA1);C427200730.1(--);scaffold1036814.1(GAPB);scaffold1039235.1(FBA6);scaffold1068438.1(PPDK2);scaffold1068438.2(PPDK);scaffold1077638.1(GAPCP2);scaffold1077639.1(GAPCP2);scaffold1295942.1(FBA3);scaffold1310924.1(PPC4);scaffold1359328.1(GGAT2);scaffold…	K00927+K00927+K00615+K00029+K01623+K01602+K01623+K01623+K01623+K05298+K01623+K01006+K01006+K00134+K00134+K01623+K01595+K14272+K01100+K14454+K00855+K00615+K00615+K14454+K01623+K01623+K01623+K01100+K00927+K00051+K01783+K01006+K00029+K00615+K00615+K00026+K01610+K00029+K00927+K14454+K14454+K03841+K05298+K01610+K00026+K14454+K00814+K00026+K00026+K14272+K00134+K01807+K05298+K00615+K00134+K03841+K05298+…	M87T145_NEG(Pyruvate)
beta-Alanine metabolism	35	84	4.01809e-06	4.78518e-05	2	10	0.429177	0.673884	ko00410	C425981847.1(ALDH3F1);C426185585.1(ECHIA);C426388765.1(At1g62810);C426466135.1(ECHIA);C426675891.1(AO1);C426864389.1(PAO4);C427024489.1(ACX3.2);C427146523.1(At1g62810);C427282186.1(GAD);C427355252.1(ACX1);scaffold1006566.2(ACX3);scaffold1113732.1(PYD3);scaffold1139197.1(ACX3);scaffold1177695.2(GAD);scaffold1256270.1(BTG-26);scaffold1273478.1(PAO6);scaffold1292087.1(ALDH2B7);scaffold1334990.1(ALDH…	K00128+K01692+K00276+K01692+K00276+K17839+K00232+K00276+K01580+K00232+K00232+K01431+K00232+K01580+K14085+K13366+K00128+K14085+K00128+K17839+K00128+K00128+K00128+K13366+K00232+K01580+K01464+K00128+K00232+K00232+K17839+K00232+K14085+K01464+K00232	M104T393_3_POS(.gamma.-aminobutyric acid);M102T393_NEG(4-Aminobutyric acid(GABA))
Glyoxylate and dicarboxylate metabolism	56	164	1.20389e-05	0.0001083	2	14	0.61751	0.707004	ko00630	C425853480.1(SHM4);C426680381.1(GLO1);C426813009.1(SHM4);C426858023.1(GDCSH);C426865749.1(GS1-2);C426961719.1(SSU5A);scaffold1041329.1(GLYK);scaffold1055324.2(GLN2);scaffold1077824.1(CIT);scaffold1149906.1(GS1-2);scaffold1186935.1(GLN2);scaffold1198562.1(At5g47720);scaffold1208499.1(SHM2);scaffold1250556.2(GLN2);scaffold1255140.1(CSY2);scaffold1268637.1(CSY2);scaffold1274872.1(GS1-2);scaffold1295…	K00600+K11517+K00600+K02437+K01915+K01602+K15918+K01915+K01647+K01915+K01915+K00626+K00600+K01915+K01647+K01647+K01915+K22133+K19269+K01915+K19269+K22133+K11517+K11517+K11517+K14272+K01915+K00281+K00382+K03781+K01915+K00626+K15893+K01681+K01681+K01895+K00284+K01681+K02437+K11517+K18121+K00600+K00830+K00026+K00122+K00830+K00830+K11517+K00026+K00605+K00026+K00026+K14272+K00284+K01915+K02437	M87T145_NEG(Pyruvate);M117T412_1_NEG(Succinate)
Amino sugar and nucleotide sugar metabolism	81	266	2.2982e-05	0.000167258	1	18	0.94077	0.949565	ko00520	C426297385.1(SQD1);C426464697.1(ChiC);C426594413.1(CSLD5);C426615745.1(MUR1);C426717199.1(SQD1);C426886891.1(GAE1);C426912747.1(CSLD5);C426967285.1(Cht5);C427108391.1(CSLD5);C427152375.1(MUR1);scaffold1017162.1(CHIT3);scaffold103161.1(UGE-1);scaffold1065056.1(RHM1);scaffold1066140.1(--);scaffold1100426.1(PGM1);scaffold1169180.1(UPTG2);scaffold118419.1(GAUT6);scaffold1220026.1(HEXO1);scaffold12225…	K06118+K01183+K00770+K01711+K06118+K08679+K00770+K01183+K00770+K01711+K01183+K01784+K12450+K15920+K01835+K13379+K13648+K12373+K13648+K00621+K00844+K01183+K00975+K00844+K00966+K01183+K12373+K00844+K20547+K17497+K12450+K00326+K08678+K00012+K01835+K00844+K15920+K00963+K00820+K00847+K01784+K20547+K20547+K01183+K00844+K01183+K06118+K08678+K00847+K01784+K01784+K00975+K17497+K01784+K00012+K01835+K20547+…	M241T425_1_NEG(.alpha.-d-galactose 1-phosphate)
Isoquinoline alkaloid biosynthesis	25	58	4.78722e-05	0.000313563	1	11	0.819548	0.86171	ko00950	C423572454.1(TYDC1);C425027950.1(co-1);C426388765.1(At1g62810);C426477033.1(AS1);C426550835.1(PPO);C426675891.1(AO1);C426983237.1(AAT);C427092303.1(co-1);C427146523.1(At1g62810);C427369764.1(N4OMT);scaffold1046320.1(N4OMT);scaffold1241630.1(AAT);scaffold1255001.1(CYP719A13);scaffold1329023.1(co-2);scaffold1373007.1(NAAT1);scaffold1410077.1(Os01g0760600);scaffold1458156.1(Os01g0760600);scaffold175…	K01593+K00422+K00276+K00422+K00422+K00276+K15849+K00422+K00276+K21311+K21311+K15849+K13395+K00422+K00815+K14454+K14454+K01593+K01593+K14454+K14454+K00422+K00422+K14454+K15849	M163T350_NEG(DL-tyrosine)
Biosynthesis of amino acids	143	552	0.000261736	0.00149076	6	31	0.270242	0.577004	ko01230	C425008110.1(MS2);C425770384.1(ADT6);C425853480.1(SHM4);C426007631.1(PGK1);C426263871.1(DHAPS-1);C426452859.1(PGK3);C426542185.1(SAMS3);C426779745.1(TYRAAT2);C426795181.1(TKT3);C426813009.1(SHM4);C426816785.1(METK1);C426865749.1(GS1-2);C426890349.1(FBA3);C426958951.1(ADT6);C426983237.1(AAT);C427039085.1(FBA2);C427040629.1(FBA1);C427050219.1(PGDH1);C427169061.1(SAMS);C427200730.1(--);C427210110.1(…	K00549+K05359+K00600+K00927+K01626+K00927+K00789+K15227+K00615+K00600+K00789+K01915+K01623+K05359+K15849+K01623+K01623+K00058+K00789+K01623+K00058+K00640+K13832+K15633+K01696+K01696+K01623+K22846+K01915+K01649+K00134+K00134+K01647+K01738+K00789+K01814+K01657+K01915+K00031+K01657+K01653+K01915+K00600+K00873+K10206+K00872+K15849+K01695+K01915+K01647+K01647+K01915+K01623+K01739+K00549+K01915+K00850+…	M116T423_POS(2-aminoadipic acid);M132T292_1_POS(DL-isoleucine);M163T350_NEG(DL-tyrosine);M129T57_NEG(Ketoleucine);M148T80_NEG(L-methionine);M87T145_NEG(Pyruvate)
Tryptophan metabolism	35	100	0.000292229	0.00159508	1	15	0.904296	0.927785	ko00380	C423572454.1(TYDC1);C425981847.1(ALDH3F1);C426185585.1(ECHIA);C426466135.1(ECHIA);C427155365.1(CYP89A9);C427319334.1(CYP78A9);scaffold1009039.1(At4g34880);scaffold110524.1(At4g26910);scaffold1105941.1(AMI1);scaffold1131295.1(ISS1);scaffold1198562.1(At5g47720);scaffold1256270.1(BTG-26);scaffold1291601.1(TAR2);scaffold1292087.1(ALDH2B7);scaffold1334990.1(ALDH7B4);scaffold1339476.1(At4g34880);scaffo…	K01593+K00128+K01692+K01692+K07408+K07408+K01426+K00658+K01426+K00837+K00626+K14085+K16903+K00128+K14085+K01426+K00128+K01426+K00382+K00128+K07408+K01426+K22450+K03781+K00128+K00128+K07408+K00658+K00626+K01426+K01593+K01593+K00128+K22450+K14085	M441T225_POS(5-hydroxy-l-tryptophan)
Pentose phosphate pathway	37	111	0.000591146	0.00286815	5	12	0.0179445	0.150871	ko00030	C426795181.1(TKT3);C426890349.1(FBA3);C427039085.1(FBA2);C427040629.1(FBA1);C427200730.1(--);C427262844.1(GAPN);C427337416.1(PGD2);scaffold1039235.1(FBA6);scaffold1100426.1(PGM1);scaffold1105089.1(G6PD2);scaffold1237554.1(G6PD1);scaffold1295942.1(FBA3);scaffold1310468.1(PFK5);scaffold1364138.1(PGD3);scaffold140436.1(PGM1);scaffold1429501.1(TKL-1);scaffold1429502.1(TKL-2);scaffold1464807.1(FBA1);s…	K00615+K01623+K01623+K01623+K01623+K00131+K00033+K01623+K01835+K00036+K00036+K01623+K00850+K00033+K01835+K00615+K00615+K01623+K01623+K01623+K00851+K00850+K00850+K00895+K00616+K01783+K01835+K00615+K00615+K00036+K00033+K03841+K00131+K00036+K01807+K00615+K03841	M134T61_POS(5-methylbenzotriazole);M178T184_POS(D-glucosaminic acid);M427T459_NEG(2-deoxyribose 5-phosphate);M195T404_NEG(D-gluconate);M87T145_NEG(Pyruvate)
Cysteine and methionine metabolism	67	234	0.000783432	0.00353895	4	11	0.0569463	0.264633	ko00270	C424716655.1(SAHH);C425008110.1(MS2);C426542185.1(SAMS3);C426816785.1(METK1);C426855361.1(SAMDC);C427038565.1(ACO2);C427050219.1(PGDH1);C427169061.1(SAMS);C427210110.1(PGDH1);C427220624.1(SAT3);C427261736.1(SAHH);C427292220.1(SAHH);C427354870.1(SAMDC);C427381344.1(ACO);scaffold1014693.1(At3g26115);scaffold1044071.1(CS26);scaffold1071739.1(ACO);scaffold1082051.1(RCS1);scaffold1087905.1(METK1);scaf…	K01251+K00549+K00789+K00789+K01611+K05933+K00058+K00789+K00058+K00640+K01251+K01251+K01611+K05933+K05396+K22846+K05933+K01738+K00789+K00837+K01761+K01761+K01761+K01761+K01739+K00549+K00058+K05933+K01011+K00549+K00815+K00789+K14454+K00640+K22846+K14454+K00549+K20772+K00558+K16054+K00827+K00026+K01251+K01738+K08967+K16054+K00831+K00928+K14454+K01611+K14454+K00789+K05933+K05933+K13034+K00026+K14454+…	M298T96_POS(S-methyl-5'-thioadenosine);M213T191_NEG(1-Deoxy-D-xylulose 5-phosphate);M148T80_NEG(L-methionine);M87T145_NEG(Pyruvate)
Phenylalanine, tyrosine and tryptophan biosynthesis	32	94	0.000902401	0.00380797	1	6	0.604767	0.702597	ko00400	C425770384.1(ADT6);C426263871.1(DHAPS-1);C426779745.1(TYRAAT2);C426958951.1(ADT6);C426983237.1(AAT);C427352946.1(EMB3004);scaffold1034639.1(TSB1);scaffold1034639.2(TSB2);scaffold1118024.1(OsASA2);scaffold1185447.1(ASA1);scaffold1241630.1(AAT);scaffold1246833.1(TSA1);scaffold1333925.1(ADT6);scaffold1373007.1(NAAT1);scaffold1387875.1(--);scaffold1410077.1(Os01g0760600);scaffold1458156.1(Os01g076060…	K05359+K01626+K15227+K05359+K15849+K13832+K01696+K01696+K01657+K01657+K15849+K01695+K05359+K00815+K15227+K14454+K14454+K15227+K01657+K06001+K01626+K01850+K00800+K14454+K14454+K15227+K05359+K14454+K05359+K15849+K01735+K01695	M163T350_NEG(DL-tyrosine)
Phenylalanine metabolism	28	79	0.00090985	0.00380797	3	9	0.1233	0.391991	ko00360	C423572454.1(TYDC1);C426185585.1(ECHIA);C426388765.1(At1g62810);C426466135.1(ECHIA);C426494589.1(PAL);C426675891.1(AO1);C426983237.1(AAT);C427146523.1(At1g62810);scaffold1009039.1(At4g34880);scaffold1105941.1(AMI1);scaffold1241630.1(AAT);scaffold1339476.1(At4g34880);scaffold1356243.1(At4g34880);scaffold1373007.1(NAAT1);scaffold1410077.1(Os01g0760600);scaffold1440159.1(At4g34880);scaffold1458156.1…	K01593+K01692+K00276+K01692+K10775+K00276+K15849+K00276+K01426+K01426+K15849+K01426+K01426+K00815+K14454+K01426+K14454+K01426+K01593+K10775+K07253+K01593+K10775+K14454+K14454+K07253+K14454+K15849	M163T350_NEG(DL-tyrosine);M87T145_NEG(Pyruvate);M117T412_1_NEG(Succinate)
Glycine, serine and threonine metabolism	46	149	0.000930191	0.00380797	3	11	0.196969	0.444587	ko00260	C425445612.1(HTH);C425853480.1(SHM4);C426388765.1(At1g62810);C426675891.1(AO1);C426755397.1(At2g24580);C426813009.1(SHM4);C426858023.1(GDCSH);C427050219.1(PGDH1);C427146523.1(At1g62810);C427210110.1(PGDH1);scaffold1015186.1(PGM1);scaffold1034639.1(TSB1);scaffold1034639.2(TSB2);scaffold1041329.1(GLYK);scaffold1208499.1(SHM2);scaffold1237475.1(HSK);scaffold1246833.1(TSA1);scaffold1256270.1(BTG-26);…	K00108+K00600+K00276+K00276+K00306+K00600+K02437+K00058+K00276+K00058+K15633+K01696+K01696+K15918+K00600+K00872+K01695+K14085+K00058+K14085+K15633+K14272+K00281+K00382+K01620+K15893+K06001+K00827+K02437+K00600+K00130+K00830+K00831+K00928+K00830+K00830+K00827+K00827+K00605+K14272+K00108+K14085+K02437+K01695+K12524+K00827	M104T287_2_POS(Choline);M71T426_NEG(Pyruvaldehyde);M87T145_NEG(Pyruvate)
Glycolysis / Gluconeogenesis	74	269	0.00147242	0.00570362	1	3	0.370264	0.650018	ko00010	C425687902.1(ADH2);C425981847.1(ALDH3F1);C426007631.1(PGK1);C426452859.1(PGK3);C426890349.1(FBA3);C427039085.1(FBA2);C427040629.1(FBA1);C427182223.1(PDH-E1);C427200730.1(--);C427262844.1(GAPN);C427332016.1(ADH1);scaffold1015186.1(PGM1);scaffold1039235.1(FBA6);scaffold1077638.1(GAPCP2);scaffold1077639.1(GAPCP2);scaffold1089325.2(Os09g0509200);scaffold1100426.1(PGM1);scaffold1153842.1(At3g13930);sc…	K18857+K00128+K00927+K00927+K01623+K01623+K01623+K00161+K01623+K00131+K18857+K15633+K01623+K00134+K00134+K00162+K01835+K00627+K00161+K00161+K18857+K00844+K00873+K14085+K00128+K01623+K00002+K00850+K00844+K14085+K00128+K00844+K00001+K15633+K00382+K01835+K18857+K00844+K00873+K00161+K00128+K00873+K18857+K00128+K00128+K01623+K01623+K01623+K00002+K00927+K00873+K01895+K00844+K00850+K00850+K00895+K01689+…	M87T145_NEG(Pyruvate)
ABC transporters	29	85	0.00148033	0.00570362	4	31	0.671259	0.73652	ko02010	C425968109.1(ABCG5);C426788769.1(ABCC3);C426948953.1(ABCG5);C427001129.1(ABCB4);C427075483.1(ABCB21);C427164955.1(ABCB2);C427194289.1(ABCC8);C427221458.1(ABCB19);C427230264.1(ABCB19);scaffold1232072.1(ABCB20);scaffold1305343.2(ABCB11);scaffold1305343.3(ABCB4);scaffold1305343.4(ABCB11);scaffold1359479.1(ABCB21);scaffold1360302.1(ABCC13);scaffold1447839.1(ABCB2);scaffold1468027.1(ABCC3);scaffold147…	K05681+K05666+K05681+K05658+K05658+K05658+K05665+K05658+K05658+K05658+K05658+K05658+K05658+K05658+K05674+K05658+K05666+K05658+K05658+K05658+K05666+K05657+K05666+K05665+K05666+K05658+K05658+K05657+K05658	M104T287_2_POS(Choline);M132T292_1_POS(DL-isoleucine);M365T390_3_POS(Sucrose);M179T415_NEG(Myo-inositol)
Arginine and proline metabolism	35	109	0.0017262	0.0064609	4	12	0.0764472	0.317859	ko00330	C425981847.1(ALDH3F1);C426855361.1(SAMDC);C426864389.1(PAO4);C427354870.1(SAMDC);scaffold1009039.1(At4g34880);scaffold1105941.1(AMI1);scaffold1235587.1(P4H3);scaffold1256270.1(BTG-26);scaffold1273478.1(PAO6);scaffold1291776.1(OAT);scaffold1292087.1(ALDH2B7);scaffold1310998.1(POX1);scaffold1310999.1(POX1);scaffold1334990.1(ALDH7B4);scaffold1339476.1(At4g34880);scaffold1346600.1(ALDH3F1);scaffold13…	K00128+K01611+K17839+K01611+K01426+K01426+K00472+K14085+K13366+K00819+K00128+K00318+K00318+K14085+K01426+K00128+K01426+K17839+K14454+K00128+K01426+K00128+K00128+K14454+K01426+K13366+K13427+K14454+K01611+K14454+K00128+K14454+K17839+K01583+K14085	M104T393_3_POS(.gamma.-aminobutyric acid);M146T378_1_POS(G-guanidinobutyrate);M102T393_NEG(4-Aminobutyric acid(GABA));M87T145_NEG(Pyruvate)
Valine, leucine and isoleucine degradation	27	80	0.0025327	0.0092162	2	2	0.0200445	0.150871	ko00280	C425981847.1(ALDH3F1);C426185585.1(ECHIA);C426466135.1(ECHIA);C427344960.1(At5g09300);C427412254.1(HMGCL);scaffold1198562.1(At5g47720);scaffold1256270.1(BTG-26);scaffold1292087.1(ALDH2B7);scaffold1316935.1(IBR3);scaffold1334990.1(ALDH7B4);scaffold1346600.1(ALDH3F1);scaffold1391437.1(LPD1);scaffold1423806.1(ALDH2B7);scaffold1430951.1(BCE2);scaffold1449005.1(ALDH2B4);scaffold1449005.2(ALDH2B4);scaf…	K00128+K01692+K01692+K00166+K01640+K00626+K14085+K00128+K00249+K14085+K00128+K00382+K00128+K09699+K00128+K00128+K00626+K00249+K00827+K01640+K00128+K01640+K00827+K00827+K00020+K14085+K00827	M132T292_1_POS(DL-isoleucine);M129T57_NEG(Ketoleucine)
Phenylpropanoid biosynthesis	59	211	0.00285238	0.010099	3	10	0.158781	0.391991	ko00940	C425604208.1(PER25);C425772952.1(4CLL1);C426280493.1(4CL2);C426399775.1(HST);C426494589.1(PAL);C426566143.1(TOGT1);C426622369.1(4CL1);C426753517.1(CYP73A1);C426945261.1(PER25);C426966535.1(PNC2);C427199293.1(BGLU18);C427243820.1(CYP73A16);C427298622.1(CSE);C427344540.1(CYP73A12);C427356216.1(N4OMT);scaffold1022487.2(PER12);scaffold1031791.1(BGLU6);scaffold1135140.1(poxN1);scaffold1191157.1(HST);s…	K00430+K01904+K01904+K13065+K10775+K23260+K01904+K00487+K00430+K00430+K05350+K00487+K18368+K00487+K00588+K00430+K01188+K00430+K13065+K00430+K09755+K00430+K11188+K05350+K01188+K05349+K09754+K00487+K12355+K01904+K18368+K23260+K00430+K00430+K00430+K00487+K05350+K09755+K10775+K01188+K05349+K00487+K01188+K10775+K00588+K00430+K00588+K05349+K01188+K01188+K23260+K01188+K18368+K00430+K01188+K18368+K00430+…	M337T194_POS(Chlorogenic acid);M163T350_NEG(DL-tyrosine);M149T322_1_NEG(P-coumaryl alcohol)
Biotin metabolism	23	68	0.00495111	0.0166306	1	4	0.460629	0.673884	ko00780	C426147525.1(BIOF);C426181183.1(fabZ);C426285625.1(KAS12);C426927565.1(fabZ);scaffold1081017.1(BIOF);scaffold1124454.1(At3g03980);scaffold1124454.2(At3g03980);scaffold125208.1(BIOF);scaffold139211.1(--);scaffold1426606.1(KAS12);scaffold1449325.1(--);scaffold1452635.1(KAS12);scaffold1501264.1(Os08g0327400);scaffold221252.1(BIOF);scaffold262336.1(BIOF);scaffold287565.1(BIOF);scaffold295620.1(BIOF);…	K00652+K02372+K09458+K02372+K00652+K00059+K00059+K00652+K00652+K09458+K00652+K09458+K00208+K00652+K00652+K00652+K00652+K09458+K00652+K00652+K09458+K00652+K00652	M188T359_POS(7-keto-8-aminopelargonic acid)
Galactose metabolism	38	129	0.00600014	0.0191712	3	11	0.196969	0.444587	ko00052	C426244921.1(RFS6);C427130855.1(--);C427416032.1(STS1);scaffold103161.1(UGE-1);scaffold1100426.1(PGM1);scaffold1115364.1(AGAL3);scaffold1123482.1(INV1);scaffold1154308.1(AGAL2);scaffold1230103.1(HXK1);scaffold1310468.1(PFK5);scaffold1313121.1(HXK1);scaffold1356175.1(HXK3);scaffold140436.1(PGM1);scaffold1412026.1(HXK3);scaffold1444885.1(UGP1);scaffold1459964.1(RFS6);scaffold1460702.1(RFS6);scaffol…	K06617+K06617+K06611+K01784+K01835+K07407+K01193+K07407+K00844+K00850+K00844+K00844+K01835+K00844+K00963+K06617+K06617+K01193+K06617+K01784+K00844+K00850+K00850+K01784+K01784+K01784+K07407+K01835+K06617+K01784+K00963+K01784+K01784+K00844+K06617+K07407+K01784+K18819	M365T390_3_POS(Sucrose);M241T425_1_NEG(.alpha.-d-galactose 1-phosphate);M179T415_NEG(Myo-inositol)
Tyrosine metabolism	30	98	0.00765603	0.0238795	3	19	0.524981	0.697015	ko00350	C423572454.1(TYDC1);C425027950.1(co-1);C425687902.1(ADH2);C426388765.1(At1g62810);C426477033.1(AS1);C426550835.1(PPO);C426675891.1(AO1);C426983237.1(AAT);C427092303.1(co-1);C427146523.1(At1g62810);C427332016.1(ADH1);scaffold1207288.1(ADH1);scaffold1241630.1(AAT);scaffold1329023.1(co-2);scaffold1356347.1(At5g24760);scaffold1373007.1(NAAT1);scaffold1406108.1(ADH1);scaffold1410077.1(Os01g0760600);sc…	K01593+K00422+K18857+K00276+K00422+K00422+K00276+K15849+K00422+K00276+K18857+K18857+K15849+K00422+K00001+K00815+K18857+K14454+K18857+K14454+K01593+K07253+K01593+K14454+K14454+K00422+K00422+K07253+K14454+K15849	M163T350_NEG(DL-tyrosine);M87T145_NEG(Pyruvate);M117T412_1_NEG(Succinate)
Butanoate metabolism	14	37	0.0088982	0.0256227	6	11	0.00173751	0.0457545	ko00650	C426185585.1(ECHIA);C426466135.1(ECHIA);C427282186.1(GAD);C427412254.1(HMGCL);scaffold1177695.2(GAD);scaffold1185995.1(At2g31810);scaffold1198562.1(At5g47720);scaffold1332601.1(ALS2);scaffold1467006.1(AAT1);scaffold329668.3(GAD4);scaffold434132.1(GLYR2);scaffold529427.1(HMGCL);scaffold579250.1(L2HGDH);scaffold822733.1(HMGCL)	K01692+K01692+K01580+K01640+K01580+K01653+K00626+K01652+K00626+K01580+K18121+K01640+K00109+K01640	M104T393_3_POS(.gamma.-aminobutyric acid);M87T393_POS(Diacetyl);M102T393_NEG(4-Aminobutyric acid(GABA));M115T428_NEG(Dl-malic acid);M87T145_NEG(Pyruvate);M117T412_1_NEG(Succinate)
Starch and sucrose metabolism	80	331	0.0312663	0.0803868	1	7	0.661866	0.736443	ko00500	C426604311.1(GLU3);C426897363.1(GLU3);C427035351.1(AMY2);C427199293.1(BGLU18);C427414358.1(TPPG);scaffold1020641.1(SPS5);scaffold1031791.1(BGLU6);scaffold1095376.1(--);scaffold1100426.1(PGM1);scaffold1123482.1(INV1);scaffold1129441.1(TPPA);scaffold1133930.1(DPEP);scaffold1172529.1(ISA1);scaffold1203951.1(SS2);scaffold1230103.1(HXK1);scaffold1260868.1(GLU12);scaffold1264886.1(BGLU18);scaffold12768…	K01179+K01179+K01176+K05350+K01087+K00696+K01188+K01176+K01835+K01193+K01087+K00705+K01214+K00703+K00844+K01179+K05350+K01188+K00695+K01176+K00975+K01214+K05349+K00844+K00700+K00700+K00844+K16055+K01835+K16055+K16055+K00844+K00695+K00703+K00963+K00847+K01193+K00700+K00700+K00703+K00705+K01176+K00844+K00695+K05350+K00847+K19891+K00703+K00700+K01188+K07024+K16055+K05349+K16055+K00975+K01188+K01835+…	M365T390_3_POS(Sucrose)
Pyruvate metabolism	51	200	0.0312956	0.0803868	3	9	0.1233	0.391991	ko00620	C425981847.1(ALDH3F1);C426823119.1(ME6);C427182223.1(PDH-E1);scaffold1056234.1(ACC1);scaffold106659.2(IPMS1);scaffold1068438.1(PPDK2);scaffold1068438.2(PPDK);scaffold1089325.2(Os09g0509200);scaffold1099702.1(DJ1D);scaffold1153842.1(At3g13930);scaffold1185218.1(Os04g0119400);scaffold1185218.2(Os04g0119400);scaffold1198562.1(At5g47720);scaffold1230683.1(At4g26390);scaffold1256270.1(BTG-26);scaffold…	K00128+K00029+K00161+K11262+K01649+K01006+K01006+K00162+K18881+K00627+K00161+K00161+K00626+K00873+K14085+K00128+K01595+K14085+K00128+K00382+K00873+K00161+K00128+K01759+K00873+K00128+K00128+K00626+K00051+K00873+K01895+K01649+K01006+K00029+K00026+K01759+K01610+K00873+K00029+K01679+K00873+K00873+K00128+K11262+K01610+K00026+K01759+K00873+K00026+K00026+K14085	M71T426_NEG(Pyruvaldehyde);M87T145_NEG(Pyruvate);M117T412_1_NEG(Succinate)
Glutathione metabolism	38	145	0.0391418	0.0967468	1	6	0.604767	0.702597	ko00480	C427030907.1(--);C427337416.1(PGD2);scaffold1053271.1(DHAR1);scaffold1105089.1(G6PD2);scaffold1161766.1(GSTF8);scaffold1168003.1(Os08g0562700);scaffold1169869.1(CICDH);scaffold1237554.1(G6PD1);scaffold1319899.1(DHAR2);scaffold1325748.1(OXP1);scaffold1364138.1(PGD3);scaffold1407457.1(PARB);scaffold1417258.1(GPX1);scaffold1420440.1(MPA1);scaffold1426001.1(ICDH-1);scaffold1449869.1(GSTL2);scaffold14…	K00434+K00033+K21888+K00036+K00799+K01256+K00031+K00036+K21888+K01469+K00033+K00799+K00432+K01256+K00031+K00799+K00799+K00432+K00432+K00434+K00434+K00434+K01256+K00799+K00383+K00799+K00031+K00799+K00036+K00033+K00799+K00799+K00031+K00434+K00036+K00434+K00799+K00383	M173T143_NEG(Dehydroascorbic acid)
Lysine degradation	19	64	0.0403679	0.0979295	2	10	0.429177	0.673884	ko00310	C425981847.1(ALDH3F1);C426185585.1(ECHIA);C426466135.1(ECHIA);C426755397.1(At2g24580);scaffold110524.1(At4g26910);scaffold1198562.1(At5g47720);scaffold1256270.1(BTG-26);scaffold1292087.1(ALDH2B7);scaffold1334990.1(ALDH7B4);scaffold1346600.1(ALDH3F1);scaffold1391437.1(LPD1);scaffold1423806.1(ALDH2B7);scaffold1449005.1(ALDH2B4);scaffold1449005.2(ALDH2B4);scaffold1463991.1(At4g26910);scaffold1467006…	K00128+K01692+K01692+K00306+K00658+K00626+K14085+K00128+K14085+K00128+K00382+K00128+K00128+K00128+K00658+K00626+K11426+K00128+K14085	M116T423_POS(2-aminoadipic acid);M117T412_1_NEG(Succinate)
Aminoacyl-tRNA biosynthesis	37	143	0.0491838	0.117147	3	4	0.00998014	0.112633	ko00970	C427306278.1(At1g29880);scaffold1011078.1(OVA6);scaffold1019756.1(IBI1);scaffold107695.1(OVA6);scaffold1108578.1(--);scaffold1181200.1(EMB2369);scaffold123334.1(OVA3);scaffold1243608.1(GATA);scaffold1266539.1(GATB);scaffold1333568.1(OsI_22356);scaffold1337977.1(EMB2247);scaffold1346226.1(EMB2247);scaffold1391478.1(OVA6);scaffold1446080.1(OVA5);scaffold1450224.1(At3g46100);scaffold1482166.1(At3g04…	K01880+K01881+K22503+K01881+K01868+K01869+K01885+K02433+K02434+K01872+K01873+K01873+K01881+K04567+K01892+K01867+K01892+K02434+K01869+K01881+K01875+K01889+K01874+K01868+K01874+K01869+K01876+K01870+K00604+K01870+K01873+K01889+K01873+K01883+K01868+K01868+K01873	M132T292_1_POS(DL-isoleucine);M163T350_NEG(DL-tyrosine);M148T80_NEG(L-methionine)
Propanoate metabolism	20	71	0.0597689	0.13816	3	6	0.0402707	0.227242	ko00640	C426185585.1(ECHIA);C426466135.1(ECHIA);C427024489.1(ACX3.2);C427344960.1(At5g09300);C427355252.1(ACX1);scaffold1006566.2(ACX3);scaffold1056234.1(ACC1);scaffold1139197.1(ACX3);scaffold1198562.1(At5g47720);scaffold1391437.1(LPD1);scaffold1430951.1(BCE2);scaffold1467006.1(AAT1);scaffold157638.1(ACS);scaffold235352.1(ACX2);scaffold435143.1(Os07g0577700);scaffold761352.2(ACC1);scaffold850469.1(ACX1);…	K01692+K01692+K00232+K00166+K00232+K00232+K11262+K00232+K00626+K00382+K09699+K00626+K01895+K00232+K01899+K11262+K00232+K00232+K00232+K00232	M73T412_NEG(Propionic acid);M71T426_NEG(Pyruvaldehyde);M117T412_1_NEG(Succinate)
Histidine metabolism	11	37	0.102438	0.21498	2	11	0.480778	0.684711	ko00340	C425981847.1(ALDH3F1);scaffold1089524.1(HISN3);scaffold1256270.1(BTG-26);scaffold1292087.1(ALDH2B7);scaffold1334990.1(ALDH7B4);scaffold1346600.1(ALDH3F1);scaffold1423806.1(ALDH2B7);scaffold1449005.1(ALDH2B4);scaffold1449005.2(ALDH2B4);scaffold719541.1(ALDH3F1);MSTRG.15685(BTG-26)	K00128+K01814+K14085+K00128+K14085+K00128+K00128+K00128+K00128+K00128+K14085	M154T66_POS(N-acetylhistamine);M337T376_1_NEG(5'-phosphoribosyl-5-amino-4-imidazolecarboxamide (aicar))
Cyanoamino acid metabolism	24	94	0.110528	0.226237	2	5	0.15034	0.391991	ko00460	C425853480.1(SHM4);C426813009.1(SHM4);C427199293.1(BGLU18);scaffold1031791.1(BGLU6);scaffold1081732.1(At3g16150);scaffold1208499.1(SHM2);scaffold1264886.1(BGLU18);scaffold1276856.1(BGLU41);scaffold1304829.1(BACOVA_02659);scaffold1350652.1(At5g08100);scaffold1443982.1(At5g08100);scaffold230252.2(BGLU44);scaffold353795.1(BGLU12);scaffold378640.1(bglX);scaffold455866.1(BGLU12);scaffold45803.1(SHM2);…	K00600+K00600+K05350+K01188+K13051+K00600+K05350+K01188+K05349+K13051+K13051+K05350+K01188+K05349+K01188+K00600+K13034+K05349+K01188+K01188+K01188+K13051+K13051+K01188	M132T292_1_POS(DL-isoleucine);M163T350_NEG(DL-tyrosine)
Terpenoid backbone biosynthesis	21	81	0.11417	0.230096	3	3	0.00278023	0.0549095	ko00900	C426412765.1(HMG3);C426518635.1(GGR);C426603705.1(HMG3);C427197187.1(HMGR1);C427295072.1(At2g17570);scaffold1188754.1(HMGR);scaffold1198562.1(At5g47720);scaffold1199145.1(SPS3);scaffold1201261.1(TKT2);scaffold1296917.1(ISPH);scaffold1322272.1(NUS1);scaffold1342839.1(ISPH);scaffold1409406.1(ISPH);scaffold1443134.1(TKT2);scaffold1467006.1(AAT1);scaffold1481308.1(Os07g0190000);scaffold341520.1(CHLP)…	K00021+K13789+K00021+K00021+K11778+K00021+K00626+K05356+K01662+K03527+K11778+K03527+K03527+K01662+K00626+K01662+K10960+K08658+K01662+K03527+K03527	M213T191_NEG(1-Deoxy-D-xylulose 5-phosphate);M147T74_NEG(Mevalonic acid);M87T145_NEG(Pyruvate)
Vitamin B6 metabolism	6	18	0.131218	0.259756	1	5	0.538202	0.697015	ko00750	C426660333.1(PDX11);scaffold1169895.1(PDX11);scaffold1365587.1(PPOX1);scaffold546041.1(PSAT1);scaffold590221.1(PLR1);MSTRG.17255(--)	K06215+K06215+K23998+K00831+K05275+K23998	M150T87_POS(Pyridoxal phosphate)
Thiamine metabolism	15	56	0.132853	0.259756	4	7	0.00946129	0.112633	ko00730	C426815281.1(TH2);scaffold1201261.1(TKT2);scaffold1274230.1(THI1-2);scaffold1443134.1(TKT2);scaffold1467163.1(At2g39270);scaffold1467163.2(ADK);scaffold1481308.1(Os07g0190000);scaffold1493269.1(THIC);scaffold219165.1(rsgA);scaffold353464.1(At5g35170);scaffold79226.1(DXS);scaffold888527.1(ADK);scaffold943999.1(Os08g0109300);MSTRG.32352(TH2);MSTRG.40416(TH2)	K22911+K01662+K03146+K01662+K00939+K00939+K01662+K03147+K06949+K00939+K01662+K00939+K00939+K22911+K22911	M150T87_POS(Pyridoxal phosphate);M213T191_NEG(1-Deoxy-D-xylulose 5-phosphate);M163T350_NEG(DL-tyrosine);M87T145_NEG(Pyruvate)
Stilbenoid, diarylheptanoid and gingerol biosynthesis	13	48	0.144794	0.278942	1	5	0.538202	0.697015	ko00945	C426399775.1(HST);C426753517.1(CYP73A1);C427243820.1(CYP73A16);C427344540.1(CYP73A12);C427356216.1(N4OMT);scaffold1191157.1(HST);scaffold1314822.1(CYP98A2);scaffold1317237.1(CYP73A16);scaffold170000.1(CYP73A1);scaffold360666.1(ROMT);scaffold433849.1(CYP73A4);scaffold65292.1(CCOAOMT1);scaffold754056.1(N4OMT)	K13065+K00487+K00487+K00487+K00588+K13065+K09754+K00487+K00487+K16040+K00487+K00588+K00588	M337T194_POS(Chlorogenic acid)
Tropane, piperidine and pyridine alkaloid biosynthesis	12	45	0.170863	0.319758	2	8	0.319143	0.603381	ko00960	C426388765.1(At1g62810);C426675891.1(AO1);C426983237.1(AAT);C427146523.1(At1g62810);scaffold1241630.1(AAT);scaffold1373007.1(NAAT1);scaffold1410077.1(Os01g0760600);scaffold1458156.1(Os01g0760600);scaffold635572.1(Os01g0760600);scaffold645663.1(Os01g0760600);scaffold810519.1(--);scaffold912257.1(AAT)	K00276+K00276+K15849+K00276+K15849+K00815+K14454+K14454+K14454+K14454+K14454+K15849	M132T292_1_POS(DL-isoleucine);M124T348_POS(Nicotinate)
Nicotinate and nicotinamide metabolism	11	42	0.201632	0.361913	7	14	0.00132461	0.0457545	ko00760	C426120353.1(AO);C427354852.1(QS);scaffold1345552.1(SRT2);scaffold1502180.1(--);scaffold30045.1(URH1);scaffold399293.1(Os11g0191400);scaffold676836.1(Os02g0134400);scaffold737429.1(Os11g0191400);scaffold853233.1(Os01g0957000);scaffold995062.1(SPAC24B11.05);MSTRG.15014(--)	K00278+K03517+K11414+K18551+K01240+K00858+K00278+K00858+K00858+K18551+K18551	M104T393_3_POS(.gamma.-aminobutyric acid);M124T348_POS(Nicotinate);M138T310_3_POS(Trigonelline);M102T393_NEG(4-Aminobutyric acid(GABA));M73T412_NEG(Propionic acid);M87T145_NEG(Pyruvate);M117T412_1_NEG(Succinate)
Ascorbate and aldarate metabolism	27	116	0.212706	0.376547	6	15	0.0117288	0.115821	ko00053	C425356152.1(AAO);C425981847.1(ALDH3F1);C427030907.1(--);C427147923.1(VTC5);C427315388.1(VTC2);scaffold1027566.1(GULLO2);scaffold1053271.1(DHAR1);scaffold1199808.1(GULLO2);scaffold1256270.1(BTG-26);scaffold1292087.1(ALDH2B7);scaffold1319899.1(DHAR2);scaffold1334990.1(ALDH7B4);scaffold1346600.1(ALDH3F1);scaffold1400335.1(UGD4);scaffold1423806.1(ALDH2B7);scaffold1449005.1(ALDH2B4);scaffold1449005.2…	K00423+K00128+K00434+K14190+K14190+K00103+K21888+K00103+K14085+K00128+K21888+K14085+K00128+K00012+K00128+K00128+K00128+K00423+K00434+K00434+K00434+K00012+K00128+K00434+K00434+K00423+K14085	M191T372_NEG(D-glucarate);M173T143_NEG(Dehydroascorbic acid);M195T379_NEG(L-gulono-1,4-lactone);M209T373_NEG(Mucic acid);M179T415_NEG(Myo-inositol);M87T145_NEG(Pyruvate)
Ether lipid metabolism	15	61	0.222018	0.387791	1	1	0.142539	0.391991	ko00565	C427174201.1(NPC1);C427271756.1(PLDBETA1);C427388998.1(SDP1);scaffold1217858.1(SDP1);scaffold1223621.1(PLDBETA1);scaffold1270853.1(PLDBETA1);scaffold1321100.1(PLDDELTA);scaffold1332299.1(SDP1);scaffold1332392.1(PLDDELTA);scaffold1413253.1(LPLAT1);scaffold1458332.1(PLDBETA1);scaffold217742.1(PLDZETA1);scaffold377219.1(NPC6);scaffold850893.1(PLDZETA1);MSTRG.42598(LPLAT1)	K01114+K01115+K14674+K14674+K01115+K01115+K01115+K14674+K01115+K13519+K01115+K01115+K01114+K01115+K13519	M258T407_2_POS(Glycerophosphocholine)
Citrate cycle (TCA cycle)	31	147	0.395004	0.646818	2	10	0.429177	0.673884	ko00020	C427182223.1(PDH-E1);scaffold1064656.1(ogdh);scaffold1077824.1(CIT);scaffold1089325.2(Os09g0509200);scaffold110524.1(At4g26910);scaffold1153842.1(At3g13930);scaffold1169869.1(CICDH);scaffold1185218.1(Os04g0119400);scaffold1185218.2(Os04g0119400);scaffold1241039.1(ogdh);scaffold1255140.1(CSY2);scaffold1268637.1(CSY2);scaffold1311573.1(IDH1);scaffold1391437.1(LPD1);scaffold1421977.1(E1);scaffold142…	K00161+K00164+K01647+K00162+K00658+K00627+K00031+K00161+K00161+K00164+K01647+K01647+K00030+K00382+K00161+K00031+K00658+K01681+K01681+K01681+K01899+K00026+K01610+K00031+K01679+K00031+K01610+K00026+K00026+K00026+K00030	M87T145_NEG(Pyruvate);M117T412_1_NEG(Succinate)
Flavonoid biosynthesis	18	84	0.408372	0.660454	2	16	0.692602	0.749528	ko00941	C426399775.1(HST);C426753517.1(CYP73A1);C427243820.1(CYP73A16);C427344540.1(CYP73A12);C427356216.1(N4OMT);scaffold1191157.1(HST);scaffold1278905.1(CHS1);scaffold1288222.1(LDOX);scaffold1314822.1(CYP98A2);scaffold1317237.1(CYP73A16);scaffold1368530.1(CHI3);scaffold1372320.1(CHI);scaffold170000.1(CYP73A1);scaffold433849.1(CYP73A4);scaffold605521.1(UGT88F5);scaffold65292.1(CCOAOMT1);scaffold711436.1…	K13065+K00487+K00487+K00487+K00588+K13065+K00660+K05277+K09754+K00487+K01859+K01859+K00487+K00487+K22845+K00588+K00475+K00588	M337T194_POS(Chlorogenic acid);M269T44_NEG(Apigenin)
Taurine and hypotaurine metabolism	3	12	0.439547	0.685485	1	4	0.460629	0.673884	ko00430	C427282186.1(GAD);scaffold1177695.2(GAD);scaffold329668.3(GAD4)	K01580+K01580+K01580	M87T145_NEG(Pyruvate)
Indole alkaloid biosynthesis	3	12	0.439547	0.685485	1	6	0.604767	0.702597	ko00901	C423572454.1(TYDC1);scaffold175902.1(TYDC2);scaffold372752.1(TDC1)	K01593+K01593+K01593	M215T347_POS(Harmaline)
Betalain biosynthesis	4	18	0.49646	0.747544	1	4	0.460629	0.673884	ko00965	C423572454.1(TYDC1);scaffold175902.1(TYDC2);scaffold372752.1(TDC1);scaffold651788.1(DODA)	K01593+K01593+K01593+K15777	M163T350_NEG(DL-tyrosine)
2-Oxocarboxylic acid metabolism	30	156	0.620483	0.913296	6	17	0.0229171	0.150871	ko01210	scaffold106659.2(IPMS1);scaffold1077824.1(CIT);scaffold1169869.1(CICDH);scaffold1185995.1(At2g31810);scaffold1255140.1(CSY2);scaffold1268637.1(CSY2);scaffold1311573.1(IDH1);scaffold1327141.1(PGAAIR);scaffold1332601.1(ALS2);scaffold1359328.1(GGAT2);scaffold1410077.1(Os01g0760600);scaffold1426001.1(ICDH-1);scaffold1458156.1(Os01g0760600);scaffold1489417.1(Os08g0191100);scaffold1489417.2(ACO3);scaff…	K01649+K01647+K00031+K01653+K01647+K01647+K00030+K00053+K01652+K14272+K14454+K00031+K14454+K01681+K01681+K01649+K00053+K01681+K00031+K00928+K14454+K14454+K00031+K14454+K00053+K00814+K14272+K00030+K00620+K01687	M116T423_POS(2-aminoadipic acid);M132T292_1_POS(DL-isoleucine);M163T350_NEG(DL-tyrosine);M129T57_NEG(Ketoleucine);M148T80_NEG(L-methionine);M87T145_NEG(Pyruvate)
Pantothenate and CoA biosynthesis	9	48	0.639035	0.921438	1	8	0.710827	0.758856	ko00770	scaffold1113732.1(PYD3);scaffold1185995.1(At2g31810);scaffold1327141.1(PGAAIR);scaffold1332601.1(ALS2);scaffold361016.1(PYD2);scaffold372316.1(At3g58610);scaffold822646.1(Os05g0573700);MSTRG.26128(DHAD);MSTRG.29788(PYD2)	K01431+K01653+K00053+K01652+K01464+K00053+K00053+K01687+K01464	M87T145_NEG(Pyruvate)
Purine metabolism	40	209	0.642894	0.921438	2	21	0.828987	0.86171	ko00230	C427136671.1(PUR2);C427171367.1(RSH2);C427181861.1(hpt);C427308894.1(ASE1);C427417810.1(AMPD);scaffold1100426.1(PGM1);scaffold1105940.1(CRSH);scaffold1135090.1(IMPDH);scaffold1230683.1(At4g26390);scaffold1288854.1(RSH2);scaffold1289998.1(XDH);scaffold1295050.1(CRSH);scaffold1363793.1(purB);scaffold1377126.1(hpt);scaffold1379534.1(NUDT23);scaffold1402319.1(XDH2);scaffold140436.1(PGM1);scaffold1414…	K01945+K00951+K00760+K00764+K01490+K01835+K00951+K00088+K00873+K00951+K00106+K00951+K01756+K00760+K18453+K00106+K01835+K00873+K00873+K00939+K00939+K00873+K01490+K00106+K00939+K01488+K01835+K01939+K01945+K00873+K00873+K00873+K00856+K01951+K00860+K00873+K00939+K00939+K00856+K00951	M136T181_2_POS(Adenine);M337T376_1_NEG(5'-phosphoribosyl-5-amino-4-imidazolecarboxamide (aicar))
Valine, leucine and isoleucine biosynthesis	8	43	0.647117	0.921438	3	5	0.0224061	0.150871	ko00290	scaffold106659.2(IPMS1);scaffold1185995.1(At2g31810);scaffold1327141.1(PGAAIR);scaffold1332601.1(ALS2);scaffold17309.1(IPMSA);scaffold372316.1(At3g58610);scaffold822646.1(Os05g0573700);MSTRG.26128(DHAD)	K01649+K01653+K00053+K01652+K01649+K00053+K00053+K01687	M132T292_1_POS(DL-isoleucine);M129T57_NEG(Ketoleucine);M87T145_NEG(Pyruvate)
C5-Branched dibasic acid metabolism	2	13	0.764938	1	2	5	0.15034	0.391991	ko00660	scaffold1185995.1(At2g31810);scaffold1332601.1(ALS2)	K01653+K01652	M129T51_NEG(Itaconic acid);M87T145_NEG(Pyruvate)
Pentose and glucuronate interconversions	29	163	0.78362	1	2	8	0.319143	0.603381	ko00040	C424105226.1(PME17);C424979486.1(PECS-2.1);C426233109.1(PME47);C427043435.1(PME47);C427184319.1(PME44);C427184369.1(PME6);C427255902.1(PG1);scaffold1186046.1(--);scaffold1206401.1(--);scaffold1212290.1(PME25);scaffold1238874.1(XYLA);scaffold1310098.1(akr1a1);scaffold1324027.1(PME41);scaffold1356531.1(PME17);scaffold1400335.1(UGD4);scaffold1444885.1(UGP1);scaffold1472997.1(akr1a1a);scaffold317276.…	K01051+K01051+K01051+K01051+K01051+K01051+K01184+K01728+K01728+K01051+K01805+K00002+K01051+K01051+K00012+K00963+K00002+K01783+K00012+K00963+K22935+K01184+K01184+K01728+K01184+K00002+K01728+K01184+K01051	M133T124_NEG(D-arabitol);M87T145_NEG(Pyruvate)
Phosphatidylinositol signaling system	20	115	0.787479	1	1	1	0.142539	0.391991	ko04070	C427339028.1(CML46);C427392920.1(PLC6);C427402514.1(PIP5K6);scaffold1093985.1(ITPK3);scaffold1160890.1(PLC2);scaffold1219976.1(CP1);scaffold1251502.1(PLC2);scaffold1321876.1(PLC6);scaffold1430798.1(ITPK5);scaffold1442842.1(ITPK3);scaffold1446666.1(Os12g0183300);scaffold1469051.2(--);scaffold1491208.1(PLC6);scaffold2654.1(CML45);scaffold387870.1(PIP5K1);scaffold5720.1(--);scaffold602381.2(IPK2b);s…	K02183+K05857+K00889+K00913+K05857+K02183+K05857+K05857+K00913+K00913+K15422+K02183+K05857+K02183+K00889+K02183+K00915+K13024+K13024+K00913	M179T415_NEG(Myo-inositol)
Sulfur metabolism	11	69	0.837871	1	1	3	0.370264	0.650018	ko00920	C427220624.1(SAT3);scaffold1082051.1(RCS1);scaffold1303522.2(CGS1);scaffold1343407.2(STR1);scaffold1357138.1(AHL);scaffold1421659.1(SAT1);scaffold1425039.2(SIR1);scaffold1446666.1(Os12g0183300);scaffold514818.1(OASC);scaffold768011.2(CYSC);scaffold823960.1(APK3)	K00640+K01738+K01739+K01011+K01082+K00640+K00392+K15422+K01738+K13034+K00860	M117T412_1_NEG(Succinate)
Flavone and flavonol biosynthesis	1	13	0.944602	1	6	13	0.00509271	0.0804648	ko00944	C426189915.1(UGT73C6)	K22771	M579T234_2_POS(2-o-rhamnosylvitexin);M285T129_POS(Acacetin);M565T263_3_POS(Apiin);M269T44_NEG(Apigenin);M431T191_1_NEG(Isovitexin);M577T234_4_NEG(Rhoifolin)
Zeatin biosynthesis	3	29	0.94743	1	2	13	0.575121	0.702597	ko00908	C427229412.1(CISZOG1);scaffold1307990.1(CKX3);scaffold1307990.2(CKX6)	K13495+K00279+K00279	M136T181_2_POS(Adenine);M298T96_POS(S-methyl-5'-thioadenosine)
Inositol phosphate metabolism	16	119	0.975766	1	1	4	0.460629	0.673884	ko00562	C427174201.1(NPC1);C427392920.1(PLC6);C427402514.1(PIP5K6);scaffold1093985.1(ITPK3);scaffold1160890.1(PLC2);scaffold1251502.1(PLC2);scaffold1321876.1(PLC6);scaffold1419705.1(INPS1);scaffold1430798.1(ITPK5);scaffold1442842.1(ITPK3);scaffold1446666.1(Os12g0183300);scaffold1491208.1(PLC6);scaffold377219.1(NPC6);scaffold387870.1(PIP5K1);scaffold602381.2(IPK2b);scaffold84030.1(ITPK3)	K01114+K05857+K00889+K00913+K05857+K05857+K05857+K01858+K00913+K00913+K15422+K05857+K01114+K00889+K00915+K00913	M179T415_NEG(Myo-inositol)
Oxidative phosphorylation	35	231	0.976082	1	1	6	0.604767	0.702597	ko00190	C424385435.1(PMA4);C425865604.1(ATPD);C426089135.1(VHA-c1);C426309833.1(PMA4);C426990347.1(ATPC);C427036977.1(AHA2);C427341404.1(ATPD);C427362608.2(At1g51650);C427405454.1(COX5B-2);scaffold1033143.2(COX15);scaffold1277600.1(VHA-c1);scaffold1291064.1(VHA-B1);scaffold1319722.1(ATPD);scaffold1379222.1(VHA-B2);scaffold1484512.1(At2g33220);scaffold1502237.1(ATPC);scaffold210042.2(ATPC);scaffold2416.2(…	K01535+K02113+K02155+K01535+K02115+K01535+K02113+K02135+K02265+K02259+K02155+K02147+K02113+K02147+K11353+K02115+K02136+K01507+K02133+K01535+K02113+K02140+K01535+K02113+K01535+K02134+K02113+K02134+K02144+K02109+K01535+K03950+K01507+K03955+K03879	M117T412_1_NEG(Succinate)
Lysine biosynthesis	3	34	0.977155	1	1	5	0.538202	0.697015	ko00300	scaffold1236260.1(AGD2);scaffold625826.1(AK1);MSTRG.33202(AKHSDH1)	K10206+K00928+K12524	M116T423_POS(2-aminoadipic acid)
Monobactam biosynthesis	2	33	0.994073	1	2	4	0.0991662	0.373054	ko00261	scaffold625826.1(AK1);MSTRG.33202(AKHSDH1)	K00928+K12524	M163T350_NEG(DL-tyrosine);M87T145_NEG(Pyruvate)
Glycerophospholipid metabolism	27	203	0.995216	1	2	8	0.319143	0.603381	ko00564	C425520098.1(LCAT1);C427174201.1(NPC1);C427271756.1(PLDBETA1);C427388998.1(SDP1);scaffold1217858.1(SDP1);scaffold1223621.1(PLDBETA1);scaffold1224727.1(GPAT6);scaffold1270853.1(PLDBETA1);scaffold1321100.1(PLDDELTA);scaffold1329310.1(LCAT1);scaffold1332299.1(SDP1);scaffold1332392.1(PLDDELTA);scaffold1382441.1(LPP3);scaffold1413253.1(LPLAT1);scaffold1447781.1(At1g78690);scaffold1456826.1(PLSC);scaff…	K06129+K01114+K01115+K14674+K14674+K01115+K13508+K01115+K01115+K06129+K14674+K01115+K18693+K13519+K13511+K13509+K01115+K01094+K00968+K01115+K01114+K13511+K00006+K00995+K13508+K01115+K13519	M104T287_2_POS(Choline);M258T407_2_POS(Glycerophosphocholine)
Pyrimidine metabolism	13	130	0.999309	1	1	19	0.949565	0.949565	ko00240	C426299789.1(CDA1);C426891239.1(TK);C427219882.1(CARB);scaffold1113732.1(PYD3);scaffold1304068.1(SPATA20);scaffold1346588.1(CARB);scaffold1451711.1(pyrH);scaffold30045.1(URH1);scaffold361016.1(PYD2);scaffold362527.1(DCTPP1);scaffold398795.1(Dctpp1);scaffold918315.1(CARA);MSTRG.29788(PYD2)	K01489+K00857+K01955+K01431+K00943+K01955+K09903+K01240+K01464+K16904+K16904+K01956+K01464	M112T265_POS(Cytosine)

## Sheet: Sheet3
Table S5 MJ0 vs MJ24 Pathway enrichment
Pathway	Gene_MJ0-vs-MJ24 (916)	Gene_All (8922)	Gene_Pvalue	Gene_Qvalue	Metabolite_MJ0-vs-MJ24 (39)	Metabolite_All (449)	Metabolite_Pvalue	Metabolite_Qvalue	Pathway ID	Genes	K_IDs	Metabolites
Metabolic pathways	596	4276	2.44625e-28	2.86211e-26	30	332	0.409703	0.687304	ko01100	C424716655.1(SAHH);C425041046.1(AOC);C425061468.1(GAUT1);C425121946.1(CAD);C425383766.1(GSTF8);C425445612.1(HTH);C425498324.1(Os03g0815200);C425604208.1(PER25);C425687902.1(ADH2);C425770384.1(ADT6);C425853480.1(SHM4);C425865604.1(ATPD);C425901541.1(FAD2-2);C426120353.1(AO);C426264403.1(HMG3);C426287741.1(TSO2);C426297385.1(SQD1);C426309833.1(PMA4);C426334737.1(ACA7);C426363719.1(STE1);C426382007.…	K01251+K10525+K13648+K00083+K00799+K00108+K00297+K00430+K18857+K05359+K00600+K02113+K10256+K00278+K00021+K10808+K06118+K01535+K01674+K00227+K01054+K02641+K03403+K13065+K00422+K10775+K00660+K08909+K10808+K00422+K08909+K01179+K01904+K02694+K15920+K06118+K15227+K00615+K09828+K00029+K02437+K10256+K17839+K01915+K01179+K15747+K01051+K01689+K00430+K19893+K01602+K00430+K01183+K08908+K13648+K02115+K02303+…	M134T61_POS(5-methylbenzotriazole);M423T35_POS(7.alpha.-hydroxy-4-cholesten-3-one);M291T436_2_POS(Argininosuccinic acid);M300T52_1_POS(Codeine);M146T378_1_POS(G-guanidinobutyrate);M118T243_POS(Indole);M165T493_POS(L-Fucose);M286T200_POS(Morphine);M244T283_POS(N-acetyl-d-galactosamine);M397T180_3_POS(Podophyllotoxin);M365T390_3_POS(Sucrose);M121T243_1_POS(Tyramine);M89T288_NEG(.beta.-hydroxypropio…
Biosynthesis of secondary metabolites	342	2308	4.16846e-16	2.43855e-14	18	170	0.172145	0.617218	ko01110	C425041046.1(AOC);C425121946.1(CAD);C425604208.1(PER25);C425687902.1(ADH2);C425770384.1(ADT6);C425853480.1(SHM4);C426264403.1(HMG3);C426363719.1(STE1);C426430765.1(CHLH);C426445525.1(--);C426477033.1(AS1);C426494589.1(PAL);C426513463.1(CHSA);C426550835.1(PPO);C426622369.1(4CL1);C426624631.1(GA2OX5);C426779745.1(TYRAAT2);C426795181.1(TKT3);C426817185.1(DIM);C426858023.1(GDCSH);C426913269.1(CYP97A3…	K10525+K00083+K00430+K18857+K05359+K00600+K00021+K00227+K03403+K13065+K00422+K10775+K00660+K00422+K01904+K04125+K15227+K00615+K09828+K02437+K15747+K01689+K00430+K01602+K00430+K02303+K00232+K01623+K00430+K00218+K00793+K05280+K01945+K00789+K01114+K00760+K00021+K01623+K00058+K01723+K20623+K10046+K01845+K00487+K14652+K00224+K01115+K01580+K13508+K18368+K15397+K03405+K14190+K18857+K15404+K00033+K09832+…	M291T436_2_POS(Argininosuccinic acid);M203T282_2_POS(Bergaptol);M300T52_1_POS(Codeine);M118T243_POS(Indole);M286T200_POS(Morphine);M397T180_3_POS(Podophyllotoxin);M365T390_3_POS(Sucrose);M121T243_1_POS(Tyramine);M153T25_NEG(2,3-dihydroxybenzoic acid);M275T428_2_NEG(6-phosphogluconic acid);M195T404_NEG(D-gluconate);M291T428_NEG(D-ribulose 1,5-bisphosphate);M75T70_NEG(Glycolate);M209T104_NEG(Jasmon…
Carbon metabolism	91	567	6.94991e-06	0.000109181	6	21	0.00596191	0.189243	ko01200	C425498324.1(Os03g0815200);C425853480.1(SHM4);C426795181.1(TKT3);C426823119.1(ME6);C426858023.1(GDCSH);C426918217.1(ENO2);C426961719.1(SSU5A);C427024489.1(ACX3.2);C427039085.1(FBA2);C427200730.1(--);C427210110.1(PGDH1);C427337416.1(PGD2);C427355252.1(ACX1);C427404434.1(GDH2);scaffold1006566.2(ACX3);scaffold1036814.1(GAPB);scaffold1041329.1(GLYK);scaffold1077638.1(GAPCP2);scaffold1077639.1(GAPCP2)…	K00297+K00600+K00615+K00029+K02437+K01689+K01602+K00232+K01623+K01623+K00058+K00033+K00232+K00261+K00232+K05298+K15918+K00134+K00134+K01647+K00873+K00232+K00627+K00873+K00031+K00036+K00297+K01647+K01647+K19269+K00850+K00030+K19269+K00261+K15633+K01100+K00033+K01899+K00058+K00855+K01913+K00031+K00615+K00121+K00030+K00658+K01623+K01100+K00121+K00051+K01681+K01895+K00232+K01807+K00616+K01783+K01689+…	M89T288_NEG(.beta.-hydroxypropionic acid);M275T428_2_NEG(6-phosphogluconic acid);M195T404_NEG(D-gluconate);M291T428_NEG(D-ribulose 1,5-bisphosphate);M75T70_NEG(Glycolate);M117T412_1_NEG(Succinate)
Phenylpropanoid biosynthesis	43	211	7.46539e-06	0.000109181	1	10	0.600816	0.777675	ko00940	C425121946.1(CAD);C425604208.1(PER25);C426445525.1(--);C426494589.1(PAL);C426622369.1(4CL1);C426945261.1(PER25);C426966535.1(PNC2);C427072997.1(PER50);C427243820.1(CYP73A16);C427298622.1(CSE);C427344540.1(CYP73A12);scaffold1011039.1(BACOVA_02659);scaffold1022487.2(PER12);scaffold1031791.2(BGLU6);scaffold1086995.2(BGLU31);scaffold1135140.1(poxN1);scaffold1191157.1(HST);scaffold1235466.1(CYP84A1);s…	K00083+K00430+K13065+K10775+K01904+K00430+K00430+K00430+K00487+K18368+K00487+K05349+K00430+K01188+K01188+K00430+K13065+K09755+K13065+K00430+K09754+K00487+K00430+K00430+K00430+K00430+K00487+K05350+K09755+K10775+K01188+K01188+K00430+K10775+K00588+K00430+K00083+K01188+K23260+K05349+K00430+K00430+K01904	M395T179_1_POS(Eleutheroside b)
Carbon fixation in photosynthetic organisms	34	160	2.69536e-05	0.000350396	1	5	0.366479	0.687304	ko00710	C426795181.1(TKT3);C426823119.1(ME6);C426961719.1(SSU5A);C427039085.1(FBA2);C427200730.1(--);scaffold1036814.1(GAPB);scaffold1077638.1(GAPCP2);scaffold1077639.1(GAPCP2);scaffold1361424.1(At3g55800);scaffold1412410.1(At1g32060);scaffold1429501.1(TKL-1);scaffold1465576.1(FBA5);scaffold1475822.1(At3g55800);scaffold148869.1(MDH1);scaffold28889.1(RPI2);scaffold317276.2(RPE);scaffold484158.2(TKL-1);sca…	K00615+K00029+K01602+K01623+K01623+K05298+K00134+K00134+K01100+K00855+K00615+K01623+K01100+K00051+K01807+K01783+K00615+K00026+K01610+K01595+K00029+K00927+K03841+K05298+K01610+K00026+K00814+K00026+K14272+K01807+K05298+K00615+K00134+K05298	M291T428_NEG(D-ribulose 1,5-bisphosphate)
alpha-Linolenic acid metabolism	26	119	0.000144417	0.00168968	1	6	0.422126	0.687304	ko00592	C425041046.1(AOC);C425687902.1(ADH2);C427024489.1(ACX3.2);C427214038.1(AOS1);C427270652.1(CEQORH);C427332016.1(ADH1);C427350524.1(4CLL5);C427355252.1(ACX1);C427386016.1(LOX6);scaffold1006566.2(ACX3);scaffold1139197.1(ACX3);scaffold1207288.1(ADH1);scaffold1246607.1(LOX3.1);scaffold1277703.1(MFP);scaffold1310442.1(AOC);scaffold232025.1(MFP);scaffold235352.1(ACX2);scaffold301620.1(PED1);scaffold4472…	K10525+K18857+K00232+K01723+K00224+K18857+K10526+K00232+K00454+K00232+K00232+K18857+K00454+K10527+K10525+K10527+K00232+K07513+K10527+K00454+K00224+K00232+K10527+K00232+K10527+K10527	M209T104_NEG(Jasmonic acid)
Glyoxylate and dicarboxylate metabolism	32	164	0.00025021	0.00243954	3	14	0.112805	0.469448	ko00630	C425853480.1(SHM4);C426858023.1(GDCSH);C426865749.1(GS1-2);C426961719.1(SSU5A);scaffold1041329.1(GLYK);scaffold1055324.2(GLN2);scaffold1077824.1(CIT);scaffold1149906.1(GS1-2);scaffold1250556.2(GLN2);scaffold1255140.1(CSY2);scaffold1268637.1(CSY2);scaffold1302159.1(PGLP1A);scaffold1327077.1(PGLP1A);scaffold1375772.2(GLN1);scaffold1424209.1(AAE7);scaffold1454094.1(GS1-1);scaffold1489417.1(Os08g0191…	K00600+K02437+K01915+K01602+K15918+K01915+K01647+K01915+K01915+K01647+K01647+K19269+K19269+K01915+K01913+K01915+K01681+K01895+K01681+K18121+K00600+K00026+K00122+K18121+K00600+K00830+K00830+K00026+K00605+K00026+K14272+K01913	M291T428_NEG(D-ribulose 1,5-bisphosphate);M75T70_NEG(Glycolate);M117T412_1_NEG(Succinate)
Amino sugar and nucleotide sugar metabolism	45	266	0.00049013	0.00441117	3	18	0.198956	0.643682	ko00520	C425061468.1(GAUT1);C426297385.1(SQD1);C426715079.1(Xyl2);C426717199.1(SQD1);C426967285.1(Cht5);C426989779.1(GAUT9);C427223492.1(OsI_032456);scaffold1010742.1(CYT1);scaffold1020.1(ARA1);scaffold103161.1(UGE-1);scaffold1065056.1(RHM1);scaffold1262275.1(Cht4);scaffold1290720.1(AGPL1);scaffold1380703.1(ASD1);scaffold1390516.1(CBR1);scaffold1393564.1(UXS2);scaffold1428747.1(UGD5);scaffold1444072.1(SP…	K13648+K06118+K15920+K06118+K01183+K13648+K10046+K00966+K12446+K01784+K12450+K01183+K00975+K01209+K00326+K08678+K00012+K00820+K00963+K13648+K00820+K01183+K00847+K01784+K01784+K00975+K01784+K01784+K13648+K01784+K01183+K01183+K12448+K01784+K00975+K10046+K08678+K08678+K00963+K00326+K00847+K20547+K08678+K01209+K01784	M165T493_POS(L-Fucose);M244T283_POS(N-acetyl-d-galactosamine);M113T288_NEG(D-galacturonic acid)
Alanine, aspartate and glutamate metabolism	23	116	0.00142227	0.0110937	2	11	0.246189	0.64478	ko00250	C426120353.1(AO);C426865749.1(GS1-2);C427282186.1(GAD);C427404434.1(GDH2);scaffold1055324.2(GLN2);scaffold1081732.1(At3g16150);scaffold1149906.1(GS1-2);scaffold1177695.2(GAD);scaffold1250556.2(GLN2);scaffold1346521.1(GDH1);scaffold1375772.2(GLN1);scaffold1444072.1(SPBC12C2.11);scaffold1454094.1(GS1-1);scaffold1462464.1(GFA1);scaffold245524.1(AS);scaffold270722.1(PYRB);scaffold329668.3(GAD4);scaff…	K00278+K01915+K01580+K00261+K01915+K13051+K01915+K01580+K01915+K00261+K01915+K00820+K01915+K00820+K01953+K00609+K01580+K00830+K00830+K00278+K00609+K00814+K14272	M291T436_2_POS(Argininosuccinic acid);M117T412_1_NEG(Succinate)
Tyrosine metabolism	19	98	0.00461601	0.0284249	2	19	0.5046	0.770917	ko00350	C425687902.1(ADH2);C426477033.1(AS1);C426550835.1(PPO);C427332016.1(ADH1);scaffold1070705.1(NAAT1);scaffold1207288.1(ADH1);scaffold1241630.1(AAT);scaffold1329023.1(co-2);scaffold1452581.1(ADH2);scaffold1480541.1(ADHIII);scaffold175902.1(TYDC2);scaffold249985.1(PAT);scaffold625959.1(At1g64710);scaffold706765.1(AS1);scaffold706765.2(AS1);scaffold747965.1(--);scaffold912257.1(AAT);scaffold943450.1(m…	K18857+K00422+K00422+K18857+K00815+K18857+K15849+K00422+K00121+K00121+K01593+K15849+K00001+K00422+K00422+K07253+K15849+K00276+K00001	M121T243_1_POS(Tyramine);M117T412_1_NEG(Succinate)
Pentose phosphate pathway	20	111	0.00863004	0.0458961	3	12	0.0769713	0.469448	ko00030	C426795181.1(TKT3);C427039085.1(FBA2);C427200730.1(--);C427337416.1(PGD2);scaffold1237554.1(G6PD1);scaffold1310468.1(PFK5);scaffold1364138.1(PGD3);scaffold1403038.1(PFP-ALPHA);scaffold1429501.1(TKL-1);scaffold1465576.1(FBA5);scaffold28889.1(RPI2);scaffold29026.1(tal);scaffold317276.2(RPE);scaffold484158.2(TKL-1);scaffold609172.1(OsI_025867);scaffold612662.1(--);scaffold700549.2(OsI_10887);scaffol…	K00615+K01623+K01623+K00033+K00036+K00850+K00033+K00895+K00615+K01623+K01807+K00616+K01783+K00615+K01057+K00850+K03841+K00131+K01807+K00615	M134T61_POS(5-methylbenzotriazole);M275T428_2_NEG(6-phosphogluconic acid);M195T404_NEG(D-gluconate)
beta-Alanine metabolism	16	84	0.0105659	0.0537485	1	10	0.600816	0.777675	ko00410	C426864389.1(PAO4);C427024489.1(ACX3.2);C427282186.1(GAD);C427355252.1(ACX1);scaffold1006566.2(ACX3);scaffold1139197.1(ACX3);scaffold1177695.2(GAD);scaffold1346600.1(ALDH3F1);scaffold235352.1(ACX2);scaffold329668.3(GAD4);scaffold392278.1(ALDH3F1);scaffold719541.1(ALDH3F1);scaffold850469.1(ACX1);scaffold876418.1(PAO5);scaffold943450.1(maoI);scaffold982102.1(ACX3)	K17839+K00232+K01580+K00232+K00232+K00232+K01580+K00128+K00232+K01580+K00128+K00128+K00232+K17839+K00276+K00232	M89T288_NEG(.beta.-hydroxypropionic acid)
Biosynthesis of amino acids	73	552	0.0129224	0.0600168	2	31	0.774537	0.822764	ko01230	C425770384.1(ADT6);C425853480.1(SHM4);C426779745.1(TYRAAT2);C426795181.1(TKT3);C426865749.1(GS1-2);C426918217.1(ENO2);C427039085.1(FBA2);C427169061.1(SAMS);C427200730.1(--);C427210110.1(PGDH1);C427376786.1(DHPS1);scaffold1034639.1(TSB1);scaffold1055324.2(GLN2);scaffold1070705.1(NAAT1);scaffold1077638.1(GAPCP2);scaffold1077639.1(GAPCP2);scaffold1077824.1(CIT);scaffold1083352.2(At4g26390);scaffold1…	K05359+K00600+K15227+K00615+K01915+K01689+K01623+K00789+K01623+K00058+K01714+K01696+K01915+K00815+K00134+K00134+K01647+K00873+K01714+K01915+K00873+K00031+K10206+K15849+K01915+K01647+K01647+K01739+K00850+K00030+K05359+K00549+K15633+K01915+K00549+K00058+K00031+K00615+K01915+K00030+K01623+K01620+K01681+K01953+K15849+K01807+K00616+K01783+K06001+K06001+K01626+K01689+K01681+K00600+K00615+K01850+K00800+…	M291T436_2_POS(Argininosuccinic acid);M148T80_NEG(L-methionine)
Isoquinoline alkaloid biosynthesis	12	58	0.0133371	0.0600168	4	11	0.0103223	0.189243	ko00950	C426477033.1(AS1);C426550835.1(PPO);scaffold1070705.1(NAAT1);scaffold1241630.1(AAT);scaffold1255001.1(CYP719A13);scaffold1329023.1(co-2);scaffold175902.1(TYDC2);scaffold249985.1(PAT);scaffold706765.1(AS1);scaffold706765.2(AS1);scaffold912257.1(AAT);scaffold943450.1(maoI)	K00422+K00422+K00815+K15849+K13395+K00422+K01593+K15849+K00422+K00422+K15849+K00276	M300T52_1_POS(Codeine);M195T181_POS(Mescaline);M286T200_POS(Morphine);M121T243_1_POS(Tyramine)
Cysteine and methionine metabolism	33	234	0.0364144	0.13201	1	11	0.636279	0.777675	ko00270	C424716655.1(SAHH);C427169061.1(SAMS);C427210110.1(PGDH1);C427292220.1(SAHH);C427398498.1(MTK);scaffold1070705.1(NAAT1);scaffold1071739.1(ACO);scaffold1091580.1(HMT-1);scaffold1131295.1(ISS1);scaffold1140431.1(DMT105);scaffold1161698.2(MGL);scaffold1229335.1(MGL);scaffold1303522.2(CGS1);scaffold132079.2(dapC);scaffold1333161.1(ACO3);scaffold1343407.2(STR1);scaffold1348005.1(Os12g0623900);scaffold…	K01251+K00789+K00058+K01251+K00899+K00815+K05933+K00547+K00837+K00558+K01761+K01761+K01739+K23977+K05933+K01011+K00549+K00016+K00016+K00549+K00058+K20772+K00026+K08967+K00797+K00928+K01611+K05933+K13034+K00026+K00549+K05933+K00026	M148T80_NEG(L-methionine)
ABC transporters	14	85	0.0500283	0.157538	5	31	0.119496	0.469448	ko02010	C427164955.1(ABCB2);C427194289.1(ABCC8);C427221458.1(ABCB19);scaffold1232072.1(ABCB20);scaffold1468027.1(ABCC3);scaffold1468028.1(ABCC7);scaffold1492827.1(ABCC3);scaffold1493594.1(ABCB19);scaffold234074.1(ABCB4);scaffold471151.1(ABCC8);scaffold523280.1(ABCB6);scaffold631491.1(ABCC10);scaffold796626.1(ABCB28);scaffold938388.1(ABCA1)	K05658+K05665+K05658+K05658+K05666+K05666+K05666+K05658+K05658+K05665+K05658+K05666+K05657+K05643	M332T320_1_POS(Ciprofloxacin);M365T390_3_POS(Sucrose);M341T390_2_NEG(1,4-d-xylobiose);M113T288_NEG(D-galacturonic acid);M683T390_2_NEG(Trehalose)
Phenylalanine, tyrosine and tryptophan biosynthesis	15	94	0.0551802	0.157538	1	6	0.422126	0.687304	ko00400	C425770384.1(ADT6);C426779745.1(TYRAAT2);scaffold1034639.1(TSB1);scaffold1070705.1(NAAT1);scaffold1241630.1(AAT);scaffold1333925.1(ADT6);scaffold249985.1(PAT);scaffold380496.1(trpB2);scaffold380496.3(trpB2);scaffold387887.2(DHAPS-1);scaffold492634.1(CM1);scaffold501640.1(EPSPS-1);scaffold668185.2(OsASA2);scaffold891798.1(--);scaffold912257.1(AAT)	K05359+K15227+K01696+K00815+K15849+K05359+K15849+K06001+K06001+K01626+K01850+K00800+K01657+K05359+K15849	M118T243_POS(Indole)
Propanoate metabolism	12	71	0.0563234	0.157538	3	6	0.0101181	0.189243	ko00640	C427024489.1(ACX3.2);C427344960.1(At5g09300);C427355252.1(ACX1);scaffold1006566.2(ACX3);scaffold1139197.1(ACX3);scaffold1372296.1(Os07g0577700);scaffold1377.1(LDHA);scaffold1377.2(LDHA);scaffold157638.1(ACS);scaffold235352.1(ACX2);scaffold850469.1(ACX1);scaffold982102.1(ACX3)	K00232+K00166+K00232+K00232+K00232+K01899+K00016+K00016+K01895+K00232+K00232+K00232	M89T288_NEG(.beta.-hydroxypropionic acid);M71T426_NEG(Pyruvaldehyde);M117T412_1_NEG(Succinate)
Phenylalanine metabolism	13	79	0.0578985	0.157538	1	9	0.561993	0.777675	ko00360	C426494589.1(PAL);scaffold1070705.1(NAAT1);scaffold1241630.1(AAT);scaffold1339476.1(At4g34880);scaffold1356243.1(At4g34880);scaffold1440159.1(At4g34880);scaffold175902.1(TYDC2);scaffold249985.1(PAT);scaffold334841.1(PAL3);scaffold487945.1(PAL1);scaffold747965.1(--);scaffold912257.1(AAT);scaffold943450.1(maoI)	K10775+K00815+K15849+K01426+K01426+K01426+K01593+K15849+K10775+K10775+K07253+K15849+K00276	M117T412_1_NEG(Succinate)
Butanoate metabolism	7	37	0.0791016	0.205664	2	11	0.246189	0.64478	ko00650	C427282186.1(GAD);scaffold1177695.2(GAD);scaffold1424209.1(AAE7);scaffold329668.3(GAD4);scaffold434132.1(GLYR2);scaffold579302.1(GLYR1);scaffold986718.1(AAE7)	K01580+K01580+K01913+K01580+K18121+K18121+K01913	M115T428_NEG(Dl-malic acid);M117T412_1_NEG(Succinate)
Cutin, suberine and wax biosynthesis	7	40	0.110128	0.262958	1	3	0.239086	0.64478	ko00073	C426033905.1(HTH);C427316452.1(CYP86A22);C427333440.1(GL1-5);scaffold1330224.1(CYP86B1);scaffold276283.1(CER1);scaffold508627.1(GL1-4);scaffold692196.1(GL1-5)	K15403+K15398+K15404+K15402+K15404+K15404+K15404	M271T52_2_NEG(16-hydroxyhexadecanoic acid)
Glycine, serine and threonine metabolism	20	149	0.127934	0.299365	1	11	0.636279	0.777675	ko00260	C425445612.1(HTH);C425853480.1(SHM4);C426858023.1(GDCSH);C427210110.1(PGDH1);scaffold1034639.1(TSB1);scaffold1041329.1(GLYK);scaffold1358333.1(PGM1);scaffold1387951.1(PGDH1);scaffold1470262.1(THA1);scaffold380496.1(trpB2);scaffold380496.3(trpB2);scaffold45803.1(SHM2);scaffold598194.1(--);scaffold625826.1(AK1);scaffold669647.1(AGT1);scaffold669647.2(AGT1);scaffold875359.1(GDCST);scaffold918734.1(G…	K00108+K00600+K02437+K00058+K01696+K15918+K15633+K00058+K01620+K06001+K06001+K00600+K00600+K00928+K00830+K00830+K00605+K14272+K00276+K00108	M71T426_NEG(Pyruvaldehyde)
Nicotinate and nicotinamide metabolism	7	42	0.133907	0.307198	1	14	0.725228	0.814031	ko00760	C426120353.1(AO);scaffold1321791.1(GSH2);scaffold1345552.1(SRT2);scaffold237188.1(NAPRT1);scaffold30045.1(URH1);scaffold651155.1(NAPRT2);scaffold676836.1(Os02g0134400)	K00278+K01081+K11414+K00763+K01240+K00763+K00278	M117T412_1_NEG(Succinate)
Sulfur metabolism	10	69	0.166245	0.366993	1	3	0.239086	0.64478	ko00920	C427384238.1(APK3);scaffold1097254.1(APS3);scaffold1303522.2(CGS1);scaffold1310027.1(APS1);scaffold1343407.2(STR1);scaffold1357138.1(AHL);scaffold1467736.1(APK1);scaffold510526.1(APS2);scaffold697837.1(APR3);scaffold768011.2(CYSC)	K00860+K13811+K01739+K13811+K01011+K01082+K00860+K13811+K05907+K13034	M117T412_1_NEG(Succinate)
Citrate cycle (TCA cycle)	18	147	0.24836	0.489713	1	10	0.600816	0.777675	ko00020	scaffold1077824.1(CIT);scaffold1153842.1(At3g13930);scaffold1169869.1(CICDH);scaffold1245914.1(ACLB-1);scaffold1255140.1(CSY2);scaffold1268637.1(CSY2);scaffold1311573.1(IDH1);scaffold1372296.1(Os07g0577700);scaffold1426001.1(ICDH-1);scaffold145775.1(IDH5);scaffold1463991.1(At4g26910);scaffold1489417.1(Os08g0191100);scaffold400830.1(Os08g0191100);scaffold493705.1(MDHG);scaffold542126.1(PCKA);scaff…	K01647+K00627+K00031+K01648+K01647+K01647+K00030+K01899+K00031+K00030+K00658+K01681+K01681+K00026+K01610+K01610+K00026+K00026	M117T412_1_NEG(Succinate)
Ascorbate and aldarate metabolism	14	116	0.301626	0.551411	2	15	0.380342	0.687304	ko00053	C427030907.1(--);C427223492.1(OsI_032456);C427261960.1(Os06g0561000);C427315388.1(VTC2);scaffold1053271.1(DHAR1);scaffold1319899.1(DHAR2);scaffold1346600.1(ALDH3F1);scaffold1428747.1(UGD5);scaffold21294.1(APXT);scaffold243895.1(CLEB3J9);scaffold392278.1(ALDH3F1);scaffold719541.1(ALDH3F1);scaffold902621.1(OsI_032456);scaffold975994.1(APX8)	K00434+K10046+K00469+K14190+K21888+K21888+K00128+K00012+K00434+K00434+K00128+K00128+K10046+K00434	M113T288_NEG(D-galacturonic acid);M135T354_NEG(L-threonate)
Pyruvate metabolism	23	200	0.31328	0.563355	2	9	0.179554	0.617218	ko00620	C426823119.1(ME6);scaffold1083352.2(At4g26390);scaffold1099702.1(DJ1D);scaffold1153842.1(At3g13930);scaffold1161691.1(PKP2);scaffold1346600.1(ALDH3F1);scaffold1377.1(LDHA);scaffold1377.2(LDHA);scaffold1424209.1(AAE7);scaffold1433238.1(GLYI-11);scaffold148869.1(MDH1);scaffold157638.1(ACS);scaffold392278.1(ALDH3F1);scaffold493705.1(MDHG);scaffold542126.1(PCKA);scaffold564832.1(PPC16);scaffold598960…	K00029+K00873+K18881+K00627+K00873+K00128+K00016+K00016+K01913+K01759+K00051+K01895+K00128+K00026+K01610+K01595+K00029+K00128+K01610+K00026+K01759+K00026+K01913	M71T426_NEG(Pyruvaldehyde);M117T412_1_NEG(Succinate)
Tryptophan metabolism	12	100	0.328488	0.568204	2	15	0.380342	0.687304	ko00380	C427155365.1(CYP89A9);scaffold1131295.1(ISS1);scaffold1315833.2(CYP89A9);scaffold1339476.1(At4g34880);scaffold1346600.1(ALDH3F1);scaffold1356243.1(At4g34880);scaffold1440159.1(At4g34880);scaffold1463991.1(At4g26910);scaffold175902.1(TYDC2);scaffold392278.1(ALDH3F1);scaffold719541.1(ALDH3F1);scaffold829759.1(TAP2)	K07408+K00837+K07408+K01426+K00128+K01426+K01426+K00658+K01593+K00128+K00128+K22450	M118T243_POS(Indole);M89T428_NEG(L-(+)-lactic acid)
Arginine biosynthesis	11	91	0.330238	0.568204	1	6	0.422126	0.687304	ko00220	C426865749.1(GS1-2);C427404434.1(GDH2);scaffold1055324.2(GLN2);scaffold1149906.1(GS1-2);scaffold1250556.2(GLN2);scaffold1346521.1(GDH1);scaffold1375772.2(GLN1);scaffold1454094.1(GS1-1);scaffold694997.1(NAGS1);scaffold882387.1(ALAAT1);scaffold918734.1(GGAT2)	K01915+K00261+K01915+K01915+K01915+K00261+K01915+K01915+K14682+K00814+K14272	M291T436_2_POS(Argininosuccinic acid)
Arginine and proline metabolism	12	109	0.444712	0.722657	1	12	0.668665	0.799491	ko00330	C426864389.1(PAO4);scaffold1235587.1(P4H3);scaffold1310998.1(POX1);scaffold1339476.1(At4g34880);scaffold1346600.1(ALDH3F1);scaffold1356243.1(At4g34880);scaffold1440159.1(At4g34880);scaffold392278.1(ALDH3F1);scaffold543766.1(SPDSYN1);scaffold637811.1(SAMDC);scaffold719541.1(ALDH3F1);scaffold876418.1(PAO5)	K17839+K00472+K00318+K01426+K00128+K01426+K01426+K00128+K00797+K01611+K00128+K17839	M146T378_1_POS(G-guanidinobutyrate)
Galactose metabolism	14	129	0.455276	0.729689	3	11	0.0613577	0.469448	ko00052	scaffold103161.1(UGE-1);scaffold1310468.1(PFK5);scaffold1368939.1(GALM);scaffold1444885.1(UGP1);scaffold393262.1(UGE-1);scaffold399376.1(UGE5);scaffold452064.1(UGE5);scaffold493874.1(UGE1);scaffold576388.1(RFS2);scaffold612662.1(--);scaffold694506.1(UGE-1);scaffold85138.1(UGE5);scaffold936805.1(UGPA);MSTRG.36598(UGE1)	K01784+K00850+K01785+K00963+K01784+K01784+K01784+K01784+K06617+K00850+K01784+K01784+K00963+K01784	M244T283_POS(N-acetyl-d-galactosamine);M365T390_3_POS(Sucrose);M179T277_2_NEG(Galactinol)
Fructose and mannose metabolism	14	132	0.491043	0.775402	1	6	0.422126	0.687304	ko00051	C427039085.1(FBA2);C427200730.1(--);C427258330.1(MAN2);scaffold1010742.1(CYT1);scaffold1310468.1(PFK5);scaffold1318722.1(MAN2);scaffold1403038.1(PFP-ALPHA);scaffold1465576.1(FBA5);scaffold246979.1(At1g66430);scaffold612662.1(--);scaffold700549.2(OsI_10887);scaffold751375.2(MAN1);scaffold938018.1(MAN2);scaffold98799.2(FRK2)	K01623+K01623+K19355+K00966+K00850+K19355+K00895+K01623+K00847+K00850+K03841+K19355+K19355+K00847	M165T493_POS(L-Fucose)
Pentose and glucuronate interconversions	16	163	0.614506	0.898715	1	8	0.5195	0.77223	ko00040	C426915619.1(PME63);C427184319.1(PME44);C427312310.1(At3g07010);scaffold1212290.1(PME25);scaffold1324027.1(PME41);scaffold1356531.1(PME17);scaffold1399642.1(At3g07010);scaffold1428747.1(UGD5);scaffold1444885.1(UGP1);scaffold1452015.1(PME47);scaffold1459036.1(XK2);scaffold317276.2(RPE);scaffold620312.2(At3g07010);scaffold771889.1(At3g53190);scaffold936805.1(UGPA);scaffold994574.2(PECS-1.1)	K01051+K01051+K01728+K01051+K01051+K01051+K01728+K00012+K00963+K01051+K00854+K01783+K01728+K01728+K00963+K01051	M113T288_NEG(D-galacturonic acid)
Plant hormone signal transduction	32	329	0.656361	0.925232	2	7	0.116884	0.469448	ko04075	C426915669.1(SAUR36);C426915971.1(IAA8);C426925149.1(--);C426964123.1(SRK2A);C427095573.1(GH3.17);C427309334.1(EBF2);scaffold10.1(HAB1);scaffold1049177.1(EBF2);scaffold1061231.1(IAA27);scaffold1072540.1(IAA8);scaffold1090099.1(IAA27);scaffold1107699.1(NPR5);scaffold1126692.1(LAX1);scaffold1245254.1(TGA7);scaffold1249326.1(NPR1);scaffold1280970.1(CTR1);scaffold1281782.1(PIF4);scaffold1344592.1(HK6…	K14488+K14484+K14488+K14498+K14487+K14515+K14497+K14515+K14484+K14484+K14484+K14508+K13946+K14431+K14508+K14510+K16189+K14489+K14431+K14497+K14514+K14514+K14493+K14484+K14484+K14516+K14484+K14510+K14515+K13464+K14484+K14489	M209T104_NEG(Jasmonic acid);M89T428_NEG(L-(+)-lactic acid)
Indole alkaloid biosynthesis	1	12	0.727684	0.974342	1	6	0.422126	0.687304	ko00901	scaffold175902.1(TYDC2)	K01593	M213T180_POS(Harmine)
Histidine metabolism	3	37	0.747133	0.982187	1	11	0.636279	0.777675	ko00340	scaffold1346600.1(ALDH3F1);scaffold392278.1(ALDH3F1);scaffold719541.1(ALDH3F1)	K00128+K00128+K00128	M154T66_POS(N-acetylhistamine)
2-Oxocarboxylic acid metabolism	13	156	0.824473	1	1	17	0.792846	0.822764	ko01210	scaffold1077824.1(CIT);scaffold1169869.1(CICDH);scaffold1255140.1(CSY2);scaffold1268637.1(CSY2);scaffold1311573.1(IDH1);scaffold1426001.1(ICDH-1);scaffold145775.1(IDH5);scaffold1489417.1(Os08g0191100);scaffold400830.1(Os08g0191100);scaffold625826.1(AK1);scaffold694997.1(NAGS1);scaffold882387.1(ALAAT1);scaffold918734.1(GGAT2)	K01647+K00031+K01647+K01647+K00030+K00031+K00030+K01681+K01681+K00928+K14682+K00814+K14272	M148T80_NEG(L-methionine)
Starch and sucrose metabolism	29	331	0.844517	1	2	7	0.116884	0.469448	ko00500	C426604311.1(GLU3);C426897363.1(GLU3);C426961211.1(At4g31140);C427414358.1(TPPG);scaffold1011039.1(BACOVA_02659);scaffold1031791.2(BGLU6);scaffold1064518.1(At4g11050);scaffold1086995.2(BGLU31);scaffold1150699.1(At1g64390);scaffold1203951.1(SS2);scaffold128328.1(AMY2);scaffold1290720.1(AGPL1);scaffold1404811.2(GLU1);scaffold1444885.1(UGP1);scaffold230252.2(BGLU44);scaffold246979.1(At1g66430);scaff…	K01179+K01179+K19893+K01087+K05349+K01188+K01179+K01188+K01179+K00703+K01176+K00975+K01179+K00963+K05350+K00847+K19891+K01188+K16055+K00975+K01188+K00688+K13679+K01188+K00975+K00688+K00963+K05349+K00847	M365T390_3_POS(Sucrose);M683T390_2_NEG(Trehalose)
Lysine degradation	4	64	0.906115	1	1	10	0.600816	0.777675	ko00310	scaffold1346600.1(ALDH3F1);scaffold1463991.1(At4g26910);scaffold392278.1(ALDH3F1);scaffold719541.1(ALDH3F1)	K00128+K00658+K00128+K00128	M117T412_1_NEG(Succinate)
Pyrimidine metabolism	9	130	0.927664	1	1	19	0.8286	0.8286	ko00240	C426287741.1(TSO2);C426526847.1(RNR2B);scaffold1014026.1(UMPS1);scaffold1321791.1(GSH2);scaffold270722.1(PYRB);scaffold30045.1(URH1);scaffold398795.1(Dctpp1);scaffold853447.1(PYRB1);scaffold877240.2(DRTS)	K10808+K10808+K13421+K01081+K00609+K01240+K16904+K00609+K13998	M89T288_NEG(.beta.-hydroxypropionic acid)
Oxidative phosphorylation	16	231	0.970012	1	1	6	0.422126	0.687304	ko00190	C425865604.1(ATPD);C426309833.1(PMA4);C426990347.1(ATPC);C427036977.1(AHA2);scaffold1177448.1(Os04g0656100);scaffold1201403.1(PPA1);scaffold1291064.1(VHA-B1);scaffold1379222.1(VHA-B2);scaffold1383487.1(FES1);scaffold1502237.1(ATPC);scaffold2416.2(PPA6);scaffold258209.2(Os04g0656100);scaffold514815.1(Os04g0656100);scaffold621310.1(PMA4);scaffold95150.1(ATPG);scaffold951965.1(Os04g0656100)	K02113+K01535+K02115+K01535+K01535+K01507+K02147+K02147+K00411+K02115+K01507+K01535+K01535+K01535+K02109+K01535	M117T412_1_NEG(Succinate)
Aminoacyl-tRNA biosynthesis	7	143	0.993439	1	1	4	0.305623	0.687304	ko00970	scaffold1421673.1(At2g33840);scaffold1487714.1(At3g46100);scaffold175039.1(EMB2369);scaffold338027.1(EMB2768);scaffold686442.1(At4g33760);scaffold810114.1(fmt);MSTRG.5685(EMB2247)	K01866+K01892+K01869+K01866+K01876+K00604+K01873	M148T80_NEG(L-methionine)

## Sheet: Sheet4
Table S5 MJ0 vs MJ48 Pathway enrichment
Pathway	Gene_MJ0-vs-MJ48 (566)	Gene_All (8922)	Gene_Pvalue	Gene_Qvalue	Metabolite_MJ0-vs-MJ48 (11)	Metabolite_All (449)	Metabolite_Pvalue	Metabolite_Qvalue	Pathway ID	Genes	K_IDs	Metabolites
Metabolic pathways	400	4276	9.23924e-30	1.02555e-27	11	332	0.0345709	0.280805	ko01100	C424466863.1(ZCD);C424979486.1(PECS-2.1);C425041046.1(AOC);C425383766.1(GSTF8);C425445612.1(HTH);C425604208.1(PER25);C425687902.1(ADH2);C425770384.1(ADT6);C425865604.1(ATPD);C425901541.1(FAD2-2);C426233109.1(PME47);C426287741.1(TSO2);C426425927.1(LFNR1);C426430765.1(CHLH);C426445525.1(--);C426464437.1(S-ACP-DES6);C426477033.1(AS1);C426494589.1(PAL);C426513463.1(CHSA);C426523857.1(CAB8);C426526847…	K09840+K01051+K10525+K00799+K00108+K00430+K18857+K05359+K02113+K10256+K01051+K10808+K02641+K03403+K13065+K03921+K00422+K10775+K00660+K08909+K10808+K08909+K01179+K01904+K02694+K15227+K09828+K00029+K02437+K17839+K01179+K01689+K00430+K09828+K01602+K01183+K02115+K00232+K00430+K02636+K00218+K05280+K01945+K07408+K10256+K22596+K01051+K04708+K00021+K01623+K20623+K10046+K01845+K01054+K01115+K13508+K18368+…	M300T52_1_POS(Codeine);M118T243_POS(Indole);M286T200_POS(Morphine);M121T36_POS(N-methyltyramine);M298T96_POS(S-methyl-5'-thioadenosine);M271T52_2_NEG(16-hydroxyhexadecanoic acid);M329T170_NEG(21-hydroxyprogesterone);M135T354_NEG(L-threonate);M147T74_NEG(Mevalonic acid);M117T412_1_NEG(Succinate);M322T126_NEG(Violacein)
Biosynthesis of secondary metabolites	235	2308	3.53743e-17	1.30885e-15	6	170	0.198761	0.356788	ko01110	C424466863.1(ZCD);C425041046.1(AOC);C425604208.1(PER25);C425687902.1(ADH2);C425770384.1(ADT6);C426430765.1(CHLH);C426445525.1(--);C426477033.1(AS1);C426494589.1(PAL);C426513463.1(CHSA);C426622369.1(4CL1);C426624631.1(GA2OX5);C426779745.1(TYRAAT2);C426817185.1(DIM);C426858023.1(GDCSH);C426918217.1(ENO2);C426945261.1(PER25);C426958033.1(DIM);C426961719.1(SSU5A);C427024489.1(ACX3.2);C427072997.1(PER…	K09840+K10525+K00430+K18857+K05359+K03403+K13065+K00422+K10775+K00660+K01904+K04125+K15227+K09828+K02437+K01689+K00430+K09828+K01602+K00232+K00430+K00218+K22772+K05280+K01945+K00021+K01623+K20623+K10046+K01845+K00224+K01115+K13508+K18368+K15397+K03405+K14190+K18857+K15404+K00033+K03403+K00487+K00166+K00232+K00232+K12638+K00966+K05349+K13082+K00430+K00430+K09840+K01188+K11188+K03404+K12502+K05933+…	M300T52_1_POS(Codeine);M118T243_POS(Indole);M286T200_POS(Morphine);M147T74_NEG(Mevalonic acid);M117T412_1_NEG(Succinate);M322T126_NEG(Violacein)
Carbon metabolism	63	567	6.66843e-06	8.2244e-05	1	21	0.413161	0.438984	ko01200	C426823119.1(ME6);C426858023.1(GDCSH);C426918217.1(ENO2);C426961719.1(SSU5A);C427024489.1(ACX3.2);C427200730.1(--);C427337416.1(PGD2);C427355252.1(ACX1);C427404434.1(GDH2);scaffold1006566.2(ACX3);scaffold1036814.1(GAPB);scaffold1077638.1(GAPCP2);scaffold1077639.1(GAPCP2);scaffold1077824.1(CIT);scaffold1083352.2(At4g26390);scaffold1153842.1(At3g13930);scaffold1169869.1(CICDH);scaffold1230683.1(At4…	K00029+K02437+K01689+K01602+K00232+K01623+K00033+K00232+K00261+K00232+K05298+K00134+K00134+K01647+K00873+K00627+K00031+K00873+K00036+K19269+K00850+K19269+K11517+K15633+K01100+K00855+K00031+K00615+K00030+K01623+K01100+K00927+K00051+K01681+K01895+K00232+K01783+K01689+K01681+K00600+K00122+K01610+K01595+K00927+K00873+K00873+K00830+K00830+K03841+K05298+K13034+K01610+K00131+K00232+K00605+K00814+K00026+…	M117T412_1_NEG(Succinate)
Glyoxylate and dicarboxylate metabolism	22	164	0.000655407	0.00485001	1	14	0.297037	0.356788	ko00630	C426858023.1(GDCSH);C426961719.1(SSU5A);scaffold1055324.2(GLN2);scaffold1077824.1(CIT);scaffold1250556.2(GLN2);scaffold1295594.1(AAE3);scaffold1302159.1(PGLP1A);scaffold1327077.1(PGLP1A);scaffold1332532.1(AAE3);scaffold1341023.1(GLO1);scaffold1375772.2(GLN1);scaffold1454094.1(GS1-1);scaffold1489417.1(Os08g0191100);scaffold157638.1(ACS);scaffold400830.1(Os08g0191100);scaffold45803.1(SHM2);scaffold…	K02437+K01602+K01915+K01647+K01915+K22133+K19269+K19269+K22133+K11517+K01915+K01915+K01681+K01895+K01681+K00600+K00122+K00830+K00830+K00605+K00026+K01915	M117T412_1_NEG(Succinate)
Tyrosine metabolism	14	98	0.00338096	0.0187643	2	19	0.0743308	0.280805	ko00350	C425687902.1(ADH2);C426477033.1(AS1);C427332016.1(ADH1);scaffold1207288.1(ADH1);scaffold1241630.1(AAT);scaffold1329023.1(co-2);scaffold1446346.1(ADH1);scaffold175902.1(TYDC2);scaffold249985.1(PAT);scaffold625959.1(At1g64710);scaffold706765.1(AS1);scaffold706765.2(AS1);scaffold943450.1(maoI);MSTRG.35414(At1g32780)	K18857+K00422+K18857+K18857+K15849+K00422+K18857+K01593+K15849+K00001+K00422+K00422+K00276+K00001	M121T36_POS(N-methyltyramine);M117T412_1_NEG(Succinate)
Isoquinoline alkaloid biosynthesis	9	58	0.0102062	0.0514949	2	11	0.0266332	0.280805	ko00950	C426477033.1(AS1);scaffold1241630.1(AAT);scaffold1255001.1(CYP719A13);scaffold1329023.1(co-2);scaffold175902.1(TYDC2);scaffold249985.1(PAT);scaffold706765.1(AS1);scaffold706765.2(AS1);scaffold943450.1(maoI)	K00422+K15849+K13395+K00422+K01593+K15849+K00422+K00422+K00276	M300T52_1_POS(Codeine);M286T200_POS(Morphine)
Alanine, aspartate and glutamate metabolism	14	116	0.0147884	0.0713703	1	11	0.241164	0.356788	ko00250	C427404434.1(GDH2);scaffold1055324.2(GLN2);scaffold1250556.2(GLN2);scaffold1375772.2(GLN1);scaffold1443982.1(At5g08100);scaffold1444072.1(SPBC12C2.11);scaffold1454094.1(GS1-1);scaffold1462464.1(GFA1);scaffold270722.1(PYRB);scaffold329668.3(GAD4);scaffold669647.1(AGT1);scaffold669647.2(AGT1);scaffold882387.1(ALAAT1);MSTRG.26565(GS2)	K00261+K01915+K01915+K01915+K13051+K00820+K01915+K00820+K00609+K01580+K00830+K00830+K00814+K01915	M117T412_1_NEG(Succinate)
Tryptophan metabolism	11	100	0.0514299	0.203883	1	15	0.314813	0.356788	ko00380	C427155365.1(CYP89A9);scaffold1131295.1(ISS1);scaffold1315833.2(CYP89A9);scaffold1346600.1(ALDH3F1);scaffold1356243.1(At4g34880);scaffold1463767.1(CYP89A9);scaffold175902.1(TYDC2);scaffold392278.1(ALDH3F1);scaffold525744.1(ALDH2B7);scaffold719541.1(ALDH3F1);scaffold829759.1(TAP2)	K07408+K00837+K07408+K00128+K01426+K07408+K01593+K00128+K00128+K00128+K22450	M118T243_POS(Indole)
Propanoate metabolism	8	71	0.0793414	0.284093	1	6	0.139008	0.356788	ko00640	C427024489.1(ACX3.2);C427344960.1(At5g09300);C427355252.1(ACX1);scaffold1006566.2(ACX3);scaffold157638.1(ACS);scaffold235352.1(ACX2);scaffold850469.1(ACX1);scaffold982102.1(ACX3)	K00232+K00166+K00232+K00232+K01895+K00232+K00232+K00232	M117T412_1_NEG(Succinate)
Cutin, suberine and wax biosynthesis	5	40	0.106775	0.326372	1	3	0.0718671	0.280805	ko00073	C426190229.1(--);C427316452.1(CYP86A22);C427333440.1(GL1-5);scaffold276283.1(CER1);scaffold508627.1(GL1-4)	K15400+K15398+K15404+K15404+K15404	M271T52_2_NEG(16-hydroxyhexadecanoic acid)
Pyruvate metabolism	17	200	0.133064	0.386148	1	9	0.201704	0.356788	ko00620	C426823119.1(ME6);scaffold1083352.2(At4g26390);scaffold1153842.1(At3g13930);scaffold1230683.1(At4g26390);scaffold1346600.1(ALDH3F1);scaffold148869.1(MDH1);scaffold157638.1(ACS);scaffold392278.1(ALDH3F1);scaffold525744.1(ALDH2B7);scaffold542126.1(PCKA);scaffold564832.1(PPC16);scaffold645352.1(At4g26390);scaffold645352.2(At4g26390);scaffold719541.1(ALDH3F1);scaffold782604.1(PCKA);scaffold839026.1(A…	K00029+K00873+K00627+K00873+K00128+K00051+K01895+K00128+K00128+K01610+K01595+K00873+K00873+K00128+K01610+K01759+K00026	M117T412_1_NEG(Succinate)
Sulfur metabolism	7	69	0.14611	0.386148	1	3	0.0718671	0.280805	ko00920	scaffold1097254.1(APS3);scaffold1303522.2(CGS1);scaffold1310027.1(APS1);scaffold1343407.2(STR1);scaffold1357138.1(AHL);scaffold697837.1(APR3);scaffold768011.2(CYSC)	K13811+K01739+K13811+K01011+K01082+K05907+K13034	M117T412_1_NEG(Succinate)
Ascorbate and aldarate metabolism	10	116	0.200327	0.494141	1	15	0.314813	0.356788	ko00053	C427223492.1(OsI_032456);C427315388.1(VTC2);scaffold1319899.1(DHAR2);scaffold1346600.1(ALDH3F1);scaffold21294.1(APXT);scaffold243895.1(CLEB3J9);scaffold392278.1(ALDH3F1);scaffold525744.1(ALDH2B7);scaffold719541.1(ALDH3F1);scaffold902621.1(OsI_032456)	K10046+K14190+K21888+K00128+K00434+K00434+K00128+K00128+K00128+K10046	M135T354_NEG(L-threonate)
Citrate cycle (TCA cycle)	11	147	0.329663	0.682746	1	10	0.221661	0.356788	ko00020	scaffold1077824.1(CIT);scaffold1153842.1(At3g13930);scaffold1169869.1(CICDH);scaffold1245914.1(ACLB-1);scaffold1426001.1(ICDH-1);scaffold145775.1(IDH5);scaffold1489417.1(Os08g0191100);scaffold400830.1(Os08g0191100);scaffold542126.1(PCKA);scaffold782604.1(PCKA);scaffold905410.1(At3g47520)	K01647+K00627+K00031+K01648+K00031+K00030+K01681+K01681+K01610+K01610+K00026	M117T412_1_NEG(Succinate)
Phenylalanine metabolism	6	79	0.386047	0.716779	1	9	0.201704	0.356788	ko00360	C426494589.1(PAL);scaffold1241630.1(AAT);scaffold1356243.1(At4g34880);scaffold175902.1(TYDC2);scaffold249985.1(PAT);scaffold943450.1(maoI)	K10775+K15849+K01426+K01593+K15849+K00276	M117T412_1_NEG(Succinate)
Phenylalanine, tyrosine and tryptophan biosynthesis	7	94	0.387448	0.716779	1	6	0.139008	0.356788	ko00400	C425770384.1(ADT6);C426779745.1(TYRAAT2);scaffold1241630.1(AAT);scaffold249985.1(PAT);scaffold380496.1(trpB2);scaffold387887.2(DHAPS-1);scaffold492634.1(CM1)	K05359+K15227+K15849+K15849+K06001+K01626+K01850	M118T243_POS(Indole)
Terpenoid backbone biosynthesis	6	81	0.40914	0.723064	1	3	0.0718671	0.280805	ko00900	C427197187.1(HMGR1);scaffold1199145.1(SPS3);scaffold1296917.1(ISPH);scaffold1342839.1(ISPH);scaffold1443134.1(TKT2);scaffold341520.1(CHLP)	K00021+K05356+K03527+K03527+K01662+K10960	M147T74_NEG(Mevalonic acid)
Cysteine and methionine metabolism	15	234	0.522338	0.840283	1	11	0.241164	0.356788	ko00270	C427398498.1(MTK);scaffold1014693.1(At3g26115);scaffold1071739.1(ACO);scaffold1091580.1(HMT-1);scaffold1131295.1(ISS1);scaffold1303522.2(CGS1);scaffold132079.2(dapC);scaffold1333161.1(ACO3);scaffold1343407.2(STR1);scaffold524776.1(VIT_05s0020g04070);scaffold543766.1(SPDSYN1);scaffold625826.1(AK1);scaffold668663.1(ACO);scaffold768011.2(CYSC);scaffold905410.1(At3g47520)	K00899+K05396+K05933+K00547+K00837+K01739+K23977+K05933+K01011+K08967+K00797+K00928+K05933+K13034+K00026	M298T96_POS(S-methyl-5'-thioadenosine)
Zeatin biosynthesis	2	29	0.557307	0.847412	1	13	0.278843	0.356788	ko00908	scaffold1343987.1(CYP735A2);scaffold301365.3(CKX4)	K10717+K00279	M298T96_POS(S-methyl-5'-thioadenosine)
Lysine degradation	4	64	0.585593	0.87839	1	10	0.221661	0.356788	ko00310	scaffold1346600.1(ALDH3F1);scaffold392278.1(ALDH3F1);scaffold525744.1(ALDH2B7);scaffold719541.1(ALDH3F1)	K00128+K00128+K00128+K00128	M117T412_1_NEG(Succinate)
Butanoate metabolism	2	37	0.690388	0.944151	1	11	0.241164	0.356788	ko00650	scaffold329668.3(GAD4);scaffold822733.1(HMGCL)	K01580+K01640	M117T412_1_NEG(Succinate)
Nicotinate and nicotinamide metabolism	2	42	0.755578	0.962799	1	14	0.297037	0.356788	ko00760	scaffold237188.1(NAPRT1);scaffold651155.1(NAPRT2)	K00763+K00763	M117T412_1_NEG(Succinate)
Oxidative phosphorylation	10	231	0.927487	0.999998	1	6	0.139008	0.356788	ko00190	C425865604.1(ATPD);C426990347.1(ATPC);scaffold1177448.1(Os04g0656100);scaffold1319722.1(ATPD);scaffold1322622.1(atpB);scaffold2416.2(PPA6);scaffold399990.1(ATPD);scaffold514815.1(Os04g0656100);scaffold95150.1(ATPG);scaffold951965.1(Os04g0656100)	K02113+K02115+K01535+K02113+K02112+K01507+K02113+K01535+K02109+K01535	M117T412_1_NEG(Succinate)
