# Supplementary material for: Phenylpropane biosynthesis and alkaloid metabolism pathways involved in resistance of Amorphophallus spp. against soft rot disease
Source: Front Plant Sci. 2024 Feb 20;15:1334996. doi: 10.3389/fpls.2024.1334996 (PMC10912172; doi:10.3389/fpls.2024.1334996)
Supplement: Supplementary file 10 [file Table_6.xls]

Table S6 Pearson correlation coefficient list of the top 250 DEGs and their metabolites.
metabolite ID Gene ID	M84T344_POS	M127T345_POS	M141T98_POS	M328T232_POS	M566T227_POS	M605T227_1_NEG	M209T459_2_NEG	M269T44_NEG	M293T153_NEG	M663T83_2_POS	M621T174_3_POS	M565T293_1_POS	M565T263_3_POS	M433T194_POS	M138T310_3_POS	M446T31_2_POS	M428T31_POS	M447T60_POS	M621T211_POS	M955T177_POS	M415T194_POS	M595T314_2_POS	M447T128_POS	M429T31_2_POS	M621T224_POS	M643T131_POS	M372T209_1_POS	M188T359_POS	M601T235_POS	M206T94_POS	M337T194_POS	M171T322_POS	M337T403_POS	M285T175_POS	M433T294_1_POS	M319T281_POS	M527T449_2_POS	M330T241_2_POS	M285T60_1_POS	M285T129_POS	M539T233_POS	M324T441_2_POS	M327T61_POS	M661T79_4_NEG	M619T173_4_NEG	M661T57_4_NEG	M577T234_4_NEG	M563T263_3_NEG	M647T152_2_NEG
scaffold1030096.1	0.433243772	0.445359266	-0.05420865	-0.163624086	0.933491678	0.693452614	0.743062226	0.892002376	0.691780596	0.805003158	0.659579909	0.748037563	0.764258764	0.912019133	0.741011857	0.892617048	0.889092787	0.683492591	0.798951023	0.746866916	0.877948996	0.897565306	0.776486624	0.883705043	0.642535967	0.603546961	0.701113574	0.841591121	0.5560588	0.946350798	0.879703681	0.672598418	0.889111077	0.764214504	0.778180373	0.918677983	0.52750013	0.698832058	0.683480134	0.783393451	0.547005185	0.843894791	0.676757335	0.696868667	0.664130624	0.635932561	0.749678391	0.755103995	0.665697378
scaffold1267815.1	0.323209788	0.329339328	-0.039941426	-0.156705925	0.867211533	0.56835846	0.524838296	0.650262734	0.574372362	0.67699267	0.563723597	0.66538026	0.724400559	0.66686116	0.497811013	0.782981207	0.783702436	0.554074885	0.696288136	0.836391604	0.704187667	0.711216108	0.7217968	0.767637869	0.507645995	0.481212211	0.603706071	0.681502658	0.392817066	0.828630727	0.679887562	0.75515627	0.781423288	0.741299534	0.728682682	0.80418341	0.403128717	0.587078565	0.565495995	0.6394092	0.427292209	0.694534817	0.564756268	0.617966969	0.584982782	0.544742674	0.718207652	0.702285306	0.581814783
scaffold1459323.1	-0.388766168	-0.363746644	-0.304502658	-0.410457244	-0.276178898	-0.339505777	-0.31511729	-0.313164851	-0.343867319	-0.309089915	-0.335589335	-0.327408932	-0.34165863	-0.288679957	-0.064686566	-0.302384325	-0.310819454	-0.340577593	-0.287906373	-0.325047416	-0.298933	-0.313156532	-0.32964684	-0.313979611	-0.311525907	-0.308874968	-0.286304017	-0.292471689	-0.338404589	-0.308465909	-0.31453224	-0.326936456	-0.309564836	-0.330512928	-0.324384774	-0.295948626	-0.350802347	-0.252264605	-0.355005986	-0.32725925	-0.359691658	-0.333867281	-0.362979191	-0.305757519	-0.334108752	-0.331590221	-0.329759181	-0.346316694	-0.317229575
scaffold201418.1	-0.371548339	-0.346791414	-0.29108223	-0.405300992	-0.268515378	-0.324080294	-0.300692522	-0.300349361	-0.329746025	-0.296384381	-0.319920217	-0.312939058	-0.326923412	-0.277852611	-0.05170421	-0.292416788	-0.300905335	-0.32615556	-0.27221042	-0.311436072	-0.288046987	-0.3000304	-0.315706289	-0.303539665	-0.295612891	-0.292666141	-0.270790469	-0.279476454	-0.329537345	-0.296066016	-0.30210303	-0.312098959	-0.297170043	-0.316172983	-0.310482947	-0.284040337	-0.334843142	-0.237670864	-0.339325466	-0.311572488	-0.342238749	-0.319305421	-0.344173667	-0.29222161	-0.318826939	-0.316392472	-0.316829489	-0.331238177	-0.303720477
C426155761.1	-0.371561753	-0.34777554	-0.290085232	-0.411875196	-0.267677448	-0.323195529	-0.300389903	-0.300625166	-0.327624707	-0.295417671	-0.321316355	-0.310943579	-0.326401281	-0.274084112	-0.048088443	-0.280910093	-0.289019486	-0.324652546	-0.273021962	-0.310603905	-0.284897126	-0.299325935	-0.314837181	-0.29128984	-0.296661261	-0.289468865	-0.269290387	-0.277575506	-0.317862775	-0.293029963	-0.304162121	-0.30954769	-0.29593378	-0.315499038	-0.308356702	-0.281974007	-0.335013942	-0.236743028	-0.339326115	-0.308331428	-0.343650916	-0.318118568	-0.348030967	-0.290596649	-0.318261477	-0.315624711	-0.312663613	-0.331013912	-0.301875271
scaffold545087.1	0.733762708	0.742489773	0.323827916	-0.280492883	0.930095874	0.908189826	0.900011165	0.974616236	0.906593115	0.933421634	0.887901091	0.946763843	0.949742582	0.989709187	0.872884362	0.980010476	0.977229597	0.895964082	0.96138675	0.90687017	0.984767658	0.991467246	0.946619003	0.980247623	0.871488085	0.846587708	0.89075206	0.971950267	0.8056016	0.974508289	0.982490855	0.88805497	0.978470074	0.945821434	0.957221928	0.98519772	0.772383026	0.866054066	0.90033292	0.963473894	0.816193349	0.977875637	0.897551262	0.907583569	0.892809857	0.870058294	0.943175039	0.945389384	0.882031841
scaffold1134482.1	0.759155005	0.774501582	0.447727228	-0.412396704	0.865985069	0.941432269	0.983851931	0.972383096	0.941878325	0.924685969	0.906154507	0.897712218	0.897701658	0.907278109	0.903773652	0.891778858	0.887733477	0.925702299	0.931810183	0.886593341	0.917077587	0.906097959	0.89207317	0.892738925	0.917957071	0.778938425	0.933781452	0.891140129	0.889460091	0.86486503	0.917073612	0.789893345	0.858824693	0.890420212	0.901866068	0.86625928	0.67157775	0.937355349	0.921606492	0.888437674	0.829155028	0.871863185	0.921124219	0.922531883	0.905198335	0.898828263	0.889663346	0.897902841	0.917084831
scaffold1199145.1	0.723394005	0.733389914	0.319587412	-0.242065962	0.928031364	0.909372326	0.925321626	0.986555403	0.908188356	0.934455429	0.883526401	0.925646654	0.928912135	0.98010357	0.874700654	0.963572081	0.960331545	0.897166141	0.949865844	0.892464601	0.973919489	0.977958477	0.928100196	0.963524604	0.873770258	0.813534066	0.894291195	0.954103564	0.815268311	0.962081943	0.974987944	0.841304951	0.952092137	0.923708899	0.935495943	0.960795597	0.732338531	0.879403191	0.899044991	0.939952309	0.80629239	0.951966248	0.895980492	0.901894571	0.885059978	0.86591409	0.919195626	0.925988654	0.882024139
scaffold685986.1	0.899057521	0.906197136	0.595426525	-0.433739823	0.809531027	0.976426015	0.942684117	0.933320186	0.975404003	0.960395292	0.972755799	0.979383596	0.971924969	0.947283316	0.945476722	0.9363824	0.935442552	0.97966057	0.984603114	0.896052856	0.951034416	0.948559561	0.972545135	0.943988205	0.972229903	0.952160654	0.965173788	0.962367148	0.939208433	0.870521432	0.947210421	0.908317307	0.915865771	0.969343742	0.968506391	0.905783201	0.857510756	0.939195955	0.98070847	0.977108581	0.950450293	0.961975059	0.976654976	0.981467859	0.979300521	0.969967109	0.974801025	0.977561321	0.97138478
scaffold1208776.1	0.595829922	0.606232819	0.147431016	-0.276074516	0.9763634	0.831419108	0.843415858	0.954158113	0.830665625	0.897922932	0.800453382	0.879321295	0.895421519	0.963213942	0.817467835	0.967895571	0.965131988	0.816285678	0.913398265	0.889113155	0.952569447	0.96416065	0.895380062	0.962313009	0.783091997	0.743642374	0.830421565	0.925237357	0.701222603	0.990653629	0.947869164	0.835992661	0.962693828	0.895537802	0.905910812	0.984475498	0.65481187	0.816563592	0.819121371	0.898383938	0.697937853	0.932880906	0.816468877	0.836190106	0.810675014	0.784318915	0.885963055	0.886067325	0.80649743
scaffold1269772.1	0.815927841	0.817131272	0.495231882	-0.3445061	0.819549364	0.896350156	0.805809495	0.847631648	0.895347595	0.903111371	0.897303868	0.955802748	0.963907642	0.901065229	0.814620548	0.936098821	0.937356447	0.89580487	0.94738929	0.917374509	0.91010153	0.920077923	0.956751098	0.941353113	0.879308315	0.93808321	0.884629682	0.930099116	0.809451323	0.886547272	0.898111724	0.982866468	0.933881384	0.968563665	0.960030357	0.930434792	0.851398381	0.837341621	0.904924253	0.96111847	0.873160243	0.959549758	0.905596415	0.919707736	0.920863729	0.902311677	0.968665058	0.962323411	0.896830061
C427233172.1	0.774234369	0.780215112	0.372969498	-0.318457456	0.894226907	0.909407752	0.883260348	0.953209001	0.906948653	0.94136436	0.896058713	0.952289659	0.952447243	0.991868732	0.88561968	0.977497207	0.976324493	0.907543508	0.964553092	0.882492852	0.976688198	0.989178204	0.954806778	0.980403157	0.884508123	0.897915418	0.894301421	0.976238313	0.819909082	0.955928575	0.975303754	0.899932158	0.974643461	0.950772987	0.955458952	0.978818074	0.81967019	0.863682305	0.911085192	0.973071853	0.849066972	0.990952121	0.907923952	0.915259896	0.90634402	0.887045695	0.948996065	0.952199602	0.892309249
scaffold790816.1	0.800751568	0.801706054	0.416687449	-0.234876927	0.813994854	0.872979628	0.814012281	0.888705278	0.869619153	0.879922107	0.889073227	0.949516985	0.940478328	0.960799172	0.833344808	0.932926097	0.931270074	0.872335965	0.927608385	0.835870176	0.961022109	0.968524258	0.941928998	0.937416247	0.845118155	0.896001989	0.832041124	0.974646971	0.782877291	0.909415812	0.961448324	0.893471574	0.964832505	0.934153451	0.945657169	0.94622277	0.89209919	0.783918607	0.881972343	0.959260965	0.857162727	0.983955147	0.876884869	0.882661114	0.880577519	0.849998171	0.937296754	0.939875581	0.852246771
MSTRG.16180	0.915800495	0.919780015	0.637206451	-0.400197564	0.77838521	0.975325599	0.920676272	0.910301231	0.973298101	0.936679657	0.963044522	0.978963569	0.968659985	0.925390651	0.894764313	0.91933133	0.919185923	0.972900638	0.972491704	0.892143166	0.927234417	0.929259994	0.959165453	0.92968988	0.970307099	0.978654446	0.949295302	0.941990684	0.936829477	0.847822667	0.923577381	0.94076339	0.90268758	0.964952944	0.964294992	0.895790604	0.883466993	0.912457239	0.976509224	0.987813499	0.957634293	0.959432821	0.977421842	0.972643495	0.978987293	0.973738807	0.972411814	0.974263177	0.962904306
C427223526.1	-0.419308153	-0.393890101	-0.326236816	-0.413846016	-0.301503675	-0.372858492	-0.347125154	-0.34379342	-0.377496808	-0.342227272	-0.368796038	-0.359841666	-0.37390653	-0.319625806	-0.096060081	-0.335271814	-0.343590322	-0.374296927	-0.320787799	-0.355512971	-0.330631205	-0.34317074	-0.362310859	-0.347391427	-0.345444119	-0.340180073	-0.3204212	-0.323842878	-0.374056914	-0.335071231	-0.345546059	-0.353394825	-0.336085941	-0.363087588	-0.356006534	-0.32186726	-0.371952148	-0.286648055	-0.388676731	-0.360627155	-0.391986216	-0.362954563	-0.395659814	-0.340334644	-0.367900559	-0.365094796	-0.363004153	-0.378808028	-0.351622367
scaffold210982.1	-0.383564133	-0.358059449	-0.297736645	-0.41655473	-0.27604863	-0.335922441	-0.308681613	-0.309732818	-0.340444503	-0.307175613	-0.332386361	-0.324488941	-0.338506612	-0.287873143	-0.056023798	-0.298640562	-0.306776314	-0.337650447	-0.284628807	-0.320565543	-0.298045604	-0.311041373	-0.32745487	-0.309545622	-0.307797371	-0.306175608	-0.278131448	-0.290418102	-0.33201386	-0.303718804	-0.314542107	-0.323904096	-0.307679622	-0.327919441	-0.321550768	-0.294883177	-0.35041636	-0.244296442	-0.350452732	-0.321628931	-0.354957138	-0.331469184	-0.357006387	-0.304023327	-0.331072972	-0.328670211	-0.325984073	-0.343107911	-0.315315319
scaffold524776.1	0.759799773	0.767085639	0.348153049	-0.288191797	0.897845057	0.887929038	0.86030408	0.935466766	0.887773533	0.926985002	0.899228616	0.95229396	0.955849563	0.984630622	0.877957235	0.972823696	0.971006159	0.889324908	0.954650908	0.886827633	0.988336913	0.992079924	0.964028979	0.972751789	0.856890534	0.855184585	0.872517301	0.989569244	0.791760531	0.961067656	0.985564829	0.882618305	0.987417278	0.953378636	0.960793482	0.975970285	0.824862443	0.840002625	0.895947688	0.949817761	0.835326361	0.985736475	0.887466221	0.904854381	0.890846662	0.859171039	0.951036617	0.95311325	0.876812346
scaffold1387654.1	0.969972533	0.971909529	0.7692713	-0.383773235	0.674498088	0.971886072	0.925750042	0.85498869	0.971666387	0.910219355	0.973899645	0.940626009	0.926945064	0.850185556	0.888251931	0.841647818	0.842510223	0.979463826	0.931120736	0.840427467	0.864092825	0.855414706	0.923359788	0.855682695	0.983420687	0.955059433	0.951281384	0.885853493	0.982230977	0.743195364	0.862848953	0.865267553	0.808671949	0.921784444	0.914991357	0.787182723	0.863713974	0.922662174	0.981374557	0.928586751	0.988976251	0.88604005	0.979782228	0.967680453	0.979397815	0.980797894	0.932552071	0.938807656	0.971587171
C426147525.1	-0.307224563	-0.287264641	-0.240154072	-0.339159403	-0.21197727	-0.261990951	-0.246770367	-0.242013224	-0.263155666	-0.235458428	-0.259567072	-0.251423084	-0.263867325	-0.214656685	-0.05735017	-0.214456033	-0.221263703	-0.261021631	-0.220782871	-0.251909137	-0.222964194	-0.24142249	-0.252606171	-0.223906308	-0.239067388	-0.237170783	-0.225969526	-0.22183914	-0.249345681	-0.24252935	-0.240463826	-0.259046894	-0.241286933	-0.252951688	-0.250484426	-0.231452856	-0.274622669	-0.20222705	-0.273512555	-0.252920849	-0.281998964	-0.259438169	-0.281854345	-0.229810867	-0.255930476	-0.255629819	-0.251040324	-0.267849853	-0.238583529
scaffold690071.1	0.762379028	0.76677912	0.358926833	-0.294591571	0.850107171	0.866942107	0.819622512	0.904851498	0.863896056	0.898711588	0.869553628	0.938740201	0.934478004	0.974992078	0.855894311	0.954214906	0.953009402	0.867866646	0.935146244	0.84207999	0.961446689	0.974786655	0.938262294	0.957461382	0.841904785	0.894345636	0.844128307	0.970872846	0.773651852	0.933773121	0.959532258	0.893325389	0.970562215	0.932164021	0.939161953	0.965344195	0.850252018	0.802427806	0.874910239	0.960131836	0.831947999	0.986316588	0.86921233	0.879867598	0.873638161	0.847605104	0.932961504	0.933662978	0.850572006
scaffold1125695.1	0.908412207	0.916089879	0.683864512	-0.399901823	0.718543526	0.93875496	0.91047345	0.845653297	0.942733069	0.894467543	0.976292918	0.928018713	0.926365437	0.831430251	0.876281027	0.830583137	0.829224998	0.947695932	0.915595336	0.869717097	0.884386452	0.857204713	0.933443768	0.835586225	0.933715929	0.833603034	0.919443338	0.897757238	0.921946644	0.760645935	0.881395873	0.816640814	0.827136359	0.920226164	0.919891189	0.78445777	0.826305348	0.898325844	0.950817124	0.860254698	0.937678399	0.858554541	0.943340825	0.951369622	0.946821879	0.926967569	0.924019471	0.931892018	0.94811326
MSTRG.36258	0.809388818	0.825314531	0.548126285	-0.487075093	0.795899444	0.9517589	0.985722884	0.940521852	0.952037788	0.928498547	0.912529784	0.887231262	0.881680778	0.880460076	0.938089951	0.86544166	0.862953675	0.945365748	0.926777548	0.851781695	0.877419288	0.869032555	0.878389802	0.87094188	0.950375509	0.833206214	0.95830692	0.863715141	0.939209336	0.8072377	0.87570603	0.783746497	0.807632817	0.877548169	0.879015838	0.8186125	0.680765496	0.96367284	0.939263945	0.889648679	0.869164015	0.850826117	0.9369991	0.935017273	0.924974055	0.931321472	0.881375736	0.888093771	0.939139996
MSTRG.10456	0.798461315	0.805604192	0.427062258	-0.295492709	0.869716401	0.917370342	0.876463447	0.93136279	0.915818534	0.937463812	0.905950243	0.960368616	0.960966098	0.970940297	0.879359253	0.972003242	0.971223832	0.915308164	0.967121808	0.89700005	0.96137325	0.972475588	0.959294263	0.976436908	0.897573681	0.921573521	0.905573937	0.968660332	0.835999608	0.940847728	0.956512821	0.927623729	0.961969255	0.960794994	0.961426966	0.96480699	0.832082303	0.869560216	0.92186185	0.982971236	0.869038661	0.985545509	0.918003115	0.926318311	0.921446015	0.904352973	0.96100124	0.961021375	0.904889133
scaffold550626.2	0.94000725	0.944535657	0.788080173	-0.460667353	0.63275268	0.950178634	0.882298208	0.804834244	0.949007013	0.856026571	0.93440233	0.917800179	0.902099409	0.788893399	0.834892823	0.797337289	0.797694427	0.943737246	0.90114336	0.842044606	0.807010452	0.799533554	0.880731786	0.811988639	0.960312182	0.952089659	0.924166871	0.830073175	0.953804208	0.694717155	0.799670493	0.901650173	0.767151499	0.897583027	0.893017917	0.755542046	0.837423973	0.888682154	0.947471547	0.917153944	0.955996947	0.847377382	0.952463419	0.939974776	0.956294145	0.963722321	0.912082731	0.910538821	0.941437128
scaffold1462882.1	0.632727898	0.63727377	0.23681992	-0.267760201	0.961711035	0.831554092	0.797891602	0.88220416	0.834107288	0.913975858	0.81761466	0.88432609	0.921882884	0.898550612	0.766424792	0.964667694	0.966183833	0.829172621	0.918866599	0.950954383	0.907336284	0.919994159	0.92549257	0.95913564	0.793395379	0.772103442	0.851837362	0.895282382	0.701775578	0.963949385	0.894314863	0.90447042	0.941547263	0.932789122	0.919134087	0.961386678	0.661468678	0.832407893	0.835406869	0.877237896	0.726368063	0.914293687	0.834542128	0.86174136	0.841583721	0.816598681	0.916364519	0.913187664	0.838953246
C427275556.1	0.553014409	0.561854619	0.089209638	-0.238874257	0.960552882	0.771429259	0.759496137	0.893719918	0.7714573	0.862409932	0.762773869	0.856668699	0.879476018	0.937086753	0.772847391	0.953987354	0.952029315	0.763398865	0.882744088	0.870095092	0.93321683	0.946818423	0.886037344	0.94606858	0.721051104	0.715773906	0.775430569	0.915404338	0.623243166	0.985813729	0.925778804	0.833172039	0.966009973	0.883228266	0.889418055	0.979806396	0.658687649	0.753158885	0.770057805	0.865903328	0.657261431	0.922579763	0.764160227	0.794794799	0.767883636	0.731255318	0.870579138	0.867949063	0.758127952
scaffold793354.1	0.841486878	0.852386355	0.603757074	-0.400737747	0.76860193	0.951931478	0.983035149	0.920451492	0.95424868	0.904535869	0.932352184	0.887815722	0.882645848	0.850203234	0.886235749	0.833514605	0.831248077	0.945138288	0.906444994	0.85298036	0.872100326	0.85281924	0.878717718	0.839408034	0.94199598	0.795644716	0.939074455	0.857367232	0.9449706	0.776913291	0.873313678	0.76296931	0.794684713	0.873385748	0.87960024	0.785188623	0.703900869	0.939474337	0.941476634	0.860879359	0.884145896	0.83121381	0.939158693	0.931870373	0.924151613	0.922666013	0.878285777	0.888429926	0.936944089
scaffold221252.1	-0.374896576	-0.351096783	-0.292411549	-0.401356094	-0.270318159	-0.325658839	-0.301983936	-0.303175422	-0.330011099	-0.297412144	-0.323073539	-0.314956543	-0.330503916	-0.277209513	-0.049478891	-0.286813549	-0.295156203	-0.326731654	-0.276290921	-0.314861772	-0.287399771	-0.303079021	-0.318057689	-0.297670199	-0.298692095	-0.295437762	-0.273019781	-0.28104678	-0.320631529	-0.298357192	-0.305923659	-0.317168063	-0.301151643	-0.319453011	-0.312490677	-0.286881119	-0.340509421	-0.238531887	-0.342091159	-0.314157912	-0.346830017	-0.323458941	-0.35204976	-0.292540171	-0.320997231	-0.318171269	-0.317323086	-0.334991564	-0.303237303
scaffold131029.1	0.580782186	0.585171032	0.121304321	-0.22171431	0.961815179	0.796374152	0.793877861	0.922124894	0.795002843	0.87470686	0.777416735	0.862843577	0.881545938	0.951451915	0.771112756	0.954254314	0.952539806	0.785907714	0.8887182	0.863897441	0.941428326	0.956251461	0.885926651	0.948152782	0.744421947	0.727986617	0.787946793	0.917537316	0.656447818	0.985409792	0.938979635	0.824533401	0.961542495	0.88217986	0.890637754	0.980431093	0.669748573	0.767930373	0.790549636	0.876043836	0.67793017	0.928460314	0.787083946	0.806623568	0.782741542	0.750991456	0.870326964	0.872036327	0.774298565
scaffold957064.1	0.863648296	0.868999661	0.541129458	-0.2968217	0.848910699	0.956885059	0.910901855	0.924809569	0.957455492	0.94772981	0.957691407	0.983780048	0.986617071	0.941839113	0.883037458	0.954443977	0.954069139	0.95438378	0.980583054	0.936653064	0.957858455	0.956646013	0.982113246	0.959899412	0.938730228	0.923878536	0.942259116	0.966237717	0.892566568	0.908612192	0.951798959	0.941504937	0.944182704	0.984755358	0.98362535	0.933197998	0.847722119	0.908523218	0.962358205	0.979690813	0.920001817	0.970917755	0.959234269	0.965572859	0.963114459	0.945147374	0.986929793	0.987188142	0.949493921
scaffold471685.1	0.712652025	0.718256656	0.317943322	-0.326121715	0.893335542	0.85879113	0.799286138	0.888822736	0.85682911	0.898075568	0.849377922	0.933605798	0.943742	0.944106268	0.821827347	0.965960583	0.965243108	0.851907497	0.940010411	0.905258395	0.940713951	0.954973515	0.939504471	0.966196879	0.827537911	0.873889974	0.851297121	0.945340947	0.740979898	0.948917449	0.930147596	0.94356737	0.970865874	0.947509294	0.947919075	0.977730861	0.790363178	0.811986411	0.860030918	0.952133204	0.793623718	0.970520254	0.859414652	0.879487157	0.869313266	0.843869626	0.94370887	0.937641628	0.848010248
scaffold130352.1	0.566775412	0.571760949	0.148363007	-0.237942029	0.955391495	0.785809289	0.746569497	0.864454032	0.786219276	0.853240201	0.766160666	0.865017543	0.895340793	0.891174585	0.718824276	0.944070344	0.943297589	0.76910688	0.885521354	0.924027862	0.900712377	0.913754758	0.888338765	0.937312145	0.7328102	0.733307447	0.788835787	0.883892	0.63013215	0.964877267	0.887218838	0.898649302	0.947548202	0.902078557	0.902238571	0.96727555	0.64624484	0.761010462	0.777840236	0.871335181	0.664459076	0.906385634	0.779081167	0.808778986	0.786891943	0.754874925	0.889159528	0.881138885	0.773594673
scaffold1279893.1	0.925877796	0.930475222	0.73373237	-0.427265559	0.674633364	0.964032277	0.925944623	0.861544032	0.961597266	0.892150874	0.930739148	0.913677039	0.896440562	0.838487387	0.867454728	0.82858657	0.828944695	0.960116414	0.916152469	0.825671365	0.832715963	0.83278317	0.880911056	0.843579948	0.9752658	0.957565106	0.941669161	0.846282381	0.969336684	0.733346366	0.830898649	0.869944389	0.782478826	0.891600473	0.887094464	0.783650245	0.816005452	0.915739652	0.959010648	0.931509345	0.951243619	0.867449071	0.963649117	0.944590585	0.958395999	0.97211401	0.902981782	0.907591951	0.950405223
C427108905.1	0.582192229	0.583950175	0.162897764	-0.230312266	0.856608953	0.739316827	0.669693967	0.811610668	0.735542249	0.792019978	0.724350343	0.847839039	0.857600452	0.89131844	0.692764288	0.908089421	0.907288181	0.725722423	0.844717024	0.817727746	0.876637235	0.900877238	0.848645354	0.90648912	0.694449697	0.788688399	0.718198783	0.87715274	0.59328229	0.917138491	0.867332319	0.88979428	0.935387502	0.860432404	0.867745827	0.949381954	0.732530255	0.669549138	0.736408327	0.885354737	0.666057165	0.91925687	0.737989947	0.757564845	0.747704965	0.716699697	0.855755166	0.847043446	0.715803324
C427226302.1	0.634597252	0.645207628	0.222748288	-0.270525158	0.983864626	0.866338953	0.882124867	0.957530278	0.868390877	0.935191043	0.833061721	0.88814422	0.914274195	0.942554045	0.834485197	0.972154478	0.971314022	0.856498598	0.933500283	0.934022189	0.93924017	0.948236162	0.915603073	0.967469356	0.827077592	0.75773731	0.885466939	0.912400403	0.756373886	0.982501093	0.932076642	0.851791212	0.94121118	0.918426302	0.916486218	0.965939463	0.628038972	0.880618123	0.859272928	0.89827062	0.733701757	0.918448016	0.856061296	0.874981729	0.851030842	0.831871756	0.907082972	0.907133776	0.855659193
MSTRG.9081	-0.327156823	-0.301851084	-0.249454583	-0.443805259	-0.238673256	-0.278332072	-0.258166973	-0.263322755	-0.282116232	-0.253351671	-0.2756588	-0.271203521	-0.28646195	-0.242271371	-0.015046101	-0.257536273	-0.266129826	-0.278530552	-0.232789556	-0.27325411	-0.250879214	-0.266644208	-0.275327881	-0.268151821	-0.248195894	-0.248139555	-0.226214638	-0.243642035	-0.273042902	-0.272666436	-0.265651082	-0.273204555	-0.266052219	-0.275267928	-0.269917543	-0.25484504	-0.303435649	-0.193180981	-0.294964945	-0.272708817	-0.297637395	-0.284893376	-0.302485808	-0.243477912	-0.271947664	-0.26768788	-0.273287372	-0.290259157	-0.255033665
scaffold1448119.1	0.811105664	0.821952314	0.581583431	-0.39894268	0.783926934	0.927640483	0.950479933	0.879591991	0.932619751	0.947667207	0.903156383	0.853981412	0.870774209	0.821596898	0.901257472	0.855643942	0.857686178	0.941995435	0.909346399	0.868771925	0.824913119	0.818090444	0.88198762	0.861013359	0.94043031	0.817897839	0.970931295	0.820041526	0.934768982	0.780878123	0.818388652	0.770423009	0.761693859	0.877650727	0.852922162	0.772826329	0.624979666	0.98402177	0.936360686	0.837901725	0.867663765	0.806908878	0.929823763	0.935198165	0.925907345	0.936006352	0.873897065	0.880623808	0.951401747
scaffold544435.1	0.604869331	0.609918081	0.143695468	-0.149792506	0.924589591	0.792418473	0.788485166	0.911875297	0.790311118	0.877863514	0.782290187	0.861653292	0.874304031	0.960474182	0.803301618	0.952526729	0.950623869	0.790428889	0.888008444	0.827256302	0.941190068	0.957664371	0.886055488	0.948372382	0.751995662	0.755647103	0.788669602	0.926640788	0.667694842	0.971322259	0.940495805	0.802268041	0.953483114	0.875381581	0.881498238	0.96668774	0.692061797	0.769883707	0.795025401	0.886050659	0.70015494	0.934005674	0.787676109	0.806977051	0.78561704	0.755292792	0.86496986	0.868645717	0.776212406
scaffold489002.1	-0.379931704	-0.355638027	-0.294328197	-0.394724973	-0.275361977	-0.330848988	-0.306150126	-0.308970944	-0.334869196	-0.302575847	-0.329170506	-0.323069141	-0.33752007	-0.286294087	-0.06750787	-0.293487729	-0.301777917	-0.331473884	-0.283221446	-0.3185161	-0.296418879	-0.311610712	-0.32521965	-0.304109613	-0.303682462	-0.302184625	-0.279023347	-0.290212545	-0.327517495	-0.304506896	-0.314270383	-0.323493451	-0.308051133	-0.326144638	-0.320123948	-0.295847316	-0.344407619	-0.246658206	-0.347726393	-0.323991746	-0.352331206	-0.331389182	-0.354277314	-0.297911554	-0.326151429	-0.322869846	-0.325551834	-0.34186422	-0.307964234
scaffold1312489.1	0.552268356	0.560029143	0.087161697	-0.232649947	0.966771449	0.782768984	0.785244125	0.917724692	0.781563082	0.867300459	0.758375391	0.851127587	0.870362164	0.947253226	0.775618276	0.954282003	0.952184202	0.770754354	0.882881188	0.859452339	0.932975835	0.949370024	0.873621084	0.947512815	0.731865478	0.71833935	0.782552049	0.908611868	0.639847535	0.984746479	0.9284136	0.820023673	0.958175572	0.872175255	0.880910714	0.979623537	0.641958711	0.764754584	0.775182202	0.872250945	0.656227628	0.921456377	0.771745582	0.794331703	0.768691659	0.738068654	0.860373847	0.859955603	0.760760508
MSTRG.32342	0.911648551	0.91976721	0.674285614	-0.440425202	0.771065091	0.983291722	0.96630345	0.90910191	0.985229221	0.960041927	0.966212985	0.939238848	0.938769714	0.882582343	0.924501537	0.891647616	0.892770824	0.990405783	0.959406219	0.891134758	0.887251347	0.882672864	0.938400635	0.901361504	0.991594859	0.930288771	0.989537403	0.895119528	0.982539836	0.808733679	0.88284545	0.871431892	0.835744109	0.938819357	0.926493642	0.83348032	0.786996991	0.976201084	0.989119016	0.933088161	0.954475158	0.895907612	0.986459023	0.982830919	0.984260947	0.989195098	0.943774666	0.948339475	0.98864251
C427073795.1	0.600835422	0.605032783	0.181034775	-0.260625713	0.904317984	0.771982591	0.708620872	0.835812967	0.771083115	0.838306344	0.765012794	0.873363297	0.893974785	0.901778671	0.72550043	0.937831151	0.93758618	0.763125447	0.879661521	0.878279693	0.900665429	0.91937781	0.890298768	0.93385976	0.727607019	0.786391319	0.766196213	0.899233788	0.624474893	0.947310985	0.888602338	0.911512188	0.957154364	0.900121105	0.900844893	0.968060296	0.724711436	0.724225042	0.773090479	0.889164027	0.690356017	0.930555528	0.773034491	0.800207723	0.785159376	0.751917945	0.89115066	0.882774999	0.761646518
scaffold1413234.1	0.600835422	0.605032783	0.181034775	-0.260625713	0.904317984	0.771982591	0.708620872	0.835812967	0.771083115	0.838306344	0.765012794	0.873363297	0.893974785	0.901778671	0.72550043	0.937831151	0.93758618	0.763125447	0.879661521	0.878279693	0.900665429	0.91937781	0.890298768	0.93385976	0.727607019	0.786391319	0.766196213	0.899233788	0.624474893	0.947310985	0.888602338	0.911512188	0.957154364	0.900121105	0.900844893	0.968060296	0.724711436	0.724225042	0.773090479	0.889164027	0.690356017	0.930555528	0.773034491	0.800207723	0.785159376	0.751917945	0.89115066	0.882774999	0.761646518
scaffold1442176.1	0.87390495	0.884984153	0.580061689	-0.424849327	0.837093697	0.980159638	0.975338401	0.951765685	0.982595026	0.96319535	0.973379569	0.963782969	0.962815539	0.931379532	0.93896143	0.92873385	0.927576327	0.979985819	0.975966315	0.917111289	0.947365342	0.936938458	0.962827102	0.933914574	0.969687012	0.889849217	0.975366127	0.945804173	0.951230091	0.872864763	0.942961889	0.874014387	0.899960095	0.95861236	0.959704564	0.890004354	0.798206156	0.960449599	0.981199173	0.947502355	0.928687346	0.931839255	0.975118305	0.980116562	0.972489377	0.962404713	0.963382234	0.966700299	0.974282309
scaffold93252.2	0.610960546	0.613167623	0.215715836	-0.263633141	0.848562676	0.750830333	0.663831627	0.78826666	0.749118672	0.801638367	0.750582041	0.864783006	0.88045636	0.870943735	0.698917966	0.907902254	0.907809821	0.741592581	0.857165336	0.852644167	0.87290093	0.891178073	0.873181313	0.905850945	0.709782445	0.800059267	0.738181611	0.880813193	0.60846172	0.907648097	0.858809018	0.919550657	0.934653052	0.886364039	0.887293645	0.940336867	0.747901045	0.687222079	0.754051845	0.883433114	0.691202089	0.916310991	0.753959897	0.781679832	0.771682915	0.737627767	0.881288278	0.869422209	0.740638319
scaffold1426496.1	0.785148254	0.792316485	0.442441897	-0.357506542	0.895578631	0.933064171	0.920274275	0.937526297	0.933800241	0.989974964	0.90247474	0.922508765	0.941327242	0.937025394	0.904199851	0.96989753	0.972027087	0.942942162	0.97226481	0.92008574	0.917339223	0.931837146	0.949940294	0.97368502	0.929736593	0.902886191	0.963686943	0.916527373	0.874990141	0.921809698	0.910602892	0.891547982	0.904012683	0.950824516	0.929610217	0.926971176	0.71986417	0.954381382	0.94135999	0.939260531	0.863191824	0.935269162	0.939301387	0.948266871	0.939015833	0.938586388	0.942200572	0.946007256	0.945227965
scaffold913555.1	0.907730955	0.916990924	0.650120955	-0.437067237	0.789604981	0.981079174	0.96829028	0.919594605	0.984107061	0.953934766	0.983918373	0.955598519	0.953914756	0.898308513	0.932735598	0.898303926	0.89791422	0.986483881	0.963476711	0.902164378	0.921190936	0.906746848	0.956487951	0.905105286	0.978559064	0.894903041	0.976685477	0.926356323	0.969275017	0.827773625	0.916838427	0.860724473	0.865992933	0.950200833	0.94681035	0.848783274	0.809391806	0.961385612	0.987313983	0.926998876	0.951163456	0.907956016	0.980561293	0.984129592	0.979978097	0.971986606	0.955784941	0.960434964	0.983426281
scaffold1299482.1	0.973719085	0.976159316	0.780391314	-0.435926173	0.644408422	0.947460323	0.868331813	0.80736427	0.947435415	0.885786278	0.96589669	0.946749438	0.932555464	0.834229667	0.872172347	0.832474045	0.833793286	0.958361523	0.922795466	0.835032724	0.854293588	0.846422598	0.928810795	0.846092989	0.961073933	0.976022501	0.924076028	0.889193011	0.950460208	0.730231687	0.848937899	0.900749618	0.818027085	0.929456611	0.921010533	0.789052415	0.910605576	0.882256207	0.964043466	0.92944845	0.989518182	0.894056436	0.96082963	0.956352806	0.97081224	0.966257549	0.941868165	0.943164028	0.954105163
scaffold1377980.1	0.705150924	0.713889282	0.285782702	-0.334309722	0.940950044	0.872077273	0.854427626	0.933381884	0.873688575	0.94611687	0.868922057	0.92556093	0.94321239	0.971485694	0.875369518	0.985261449	0.985176787	0.877179791	0.953075058	0.909163677	0.966591387	0.975709363	0.954916416	0.983174702	0.844141532	0.831956472	0.885904649	0.961063492	0.772160291	0.977592025	0.959356498	0.879900208	0.973977995	0.948262005	0.94372256	0.979564679	0.743541125	0.864358449	0.880880497	0.927038862	0.794173417	0.964544869	0.872289139	0.897451209	0.878092638	0.852314267	0.940369309	0.939704743	0.873950121
MSTRG.7907	0.836277421	0.835889401	0.582185219	-0.358729515	0.741367766	0.891825285	0.785968956	0.800779851	0.889895654	0.852324666	0.880369376	0.934385604	0.934575055	0.838505038	0.763069178	0.876711001	0.877956614	0.881909607	0.91279948	0.892696386	0.851671852	0.859316481	0.912947133	0.885831124	0.87832899	0.946004713	0.86543241	0.874144428	0.821873649	0.809704592	0.838258165	0.987284349	0.871822609	0.936554676	0.930560609	0.869466739	0.848831736	0.811994653	0.89182699	0.947178664	0.876860421	0.914854464	0.898222136	0.902242041	0.912453858	0.902337755	0.942727577	0.933607906	0.883002327
scaffold787291.1	0.768237767	0.779732093	0.38559116	-0.389041685	0.928235666	0.926686729	0.922865532	0.964164778	0.928510749	0.971788787	0.921447311	0.95073932	0.963134695	0.973851928	0.925846496	0.980250205	0.979376766	0.929151913	0.978330157	0.929441917	0.977362792	0.978713733	0.971760439	0.979458922	0.904447752	0.851984639	0.937438917	0.970600396	0.84972434	0.958915456	0.971779545	0.880945599	0.961000568	0.964704429	0.962624833	0.963358046	0.758956536	0.923243842	0.932182562	0.943681564	0.849805398	0.963408194	0.923798175	0.942271026	0.924802194	0.904251062	0.960243463	0.962039865	0.925522967
scaffold942905.1	0.853917169	0.859558765	0.529042893	-0.326483762	0.826722213	0.948369905	0.912480159	0.930892771	0.947245643	0.935466698	0.936174722	0.967077956	0.960568208	0.951014362	0.897099124	0.943343644	0.942409868	0.944494777	0.967006613	0.89064686	0.949472532	0.951769108	0.954886139	0.950555935	0.93427592	0.932681783	0.930522028	0.955939095	0.897246229	0.892616035	0.945471335	0.913216636	0.926607244	0.956933618	0.959531655	0.922858217	0.837991869	0.899026447	0.949967999	0.98275934	0.909886907	0.965174445	0.94600152	0.948231975	0.947108296	0.935054823	0.963152275	0.963144369	0.93310373
scaffold382109.1	-0.309556091	-0.290331289	-0.242238478	-0.339630542	-0.219855944	-0.262652267	-0.248903969	-0.24619952	-0.264316903	-0.237258465	-0.261505399	-0.254982283	-0.269956178	-0.217528752	-0.054073433	-0.220028697	-0.227689391	-0.261135667	-0.223741302	-0.260224463	-0.226232774	-0.246733907	-0.257118498	-0.229508429	-0.239289903	-0.236385575	-0.229607952	-0.225187105	-0.251166862	-0.252454778	-0.244281026	-0.265618342	-0.247944281	-0.25863921	-0.254521742	-0.238010511	-0.276740525	-0.20385124	-0.27831124	-0.25911526	-0.284458371	-0.265270542	-0.287891122	-0.228807687	-0.257268628	-0.255455712	-0.257051276	-0.273671836	-0.238004973
C426321109.1	0.915552235	0.915469852	0.666916122	-0.360814055	0.582123521	0.85288402	0.762834662	0.761259416	0.849353824	0.7758242	0.903311584	0.917338267	0.882353406	0.843117277	0.808010085	0.782946996	0.780945527	0.857927318	0.851172096	0.71888224	0.867148051	0.857087606	0.879355891	0.795163436	0.846452481	0.910757828	0.783048175	0.906647672	0.828275427	0.712598163	0.869633075	0.832759333	0.84267374	0.867129642	0.885967254	0.786048202	0.98363075	0.719128672	0.869348947	0.898634764	0.923025166	0.900136275	0.863198229	0.856598881	0.871149807	0.842999823	0.886218914	0.888899157	0.832960227
scaffold1454356.2	0.81992637	0.823062268	0.488698925	-0.357744729	0.839787792	0.900896046	0.824107202	0.856777865	0.902291185	0.939055468	0.914743618	0.954028063	0.969671252	0.911923175	0.854972264	0.95234228	0.954416966	0.913591515	0.960160691	0.923565638	0.921889858	0.928851847	0.97686207	0.955681777	0.891762297	0.926493053	0.908961396	0.942833683	0.824903852	0.898879973	0.909949515	0.954008314	0.935686766	0.978369071	0.960927436	0.929135968	0.833648333	0.871572646	0.920527761	0.944041431	0.883047435	0.957786982	0.915316481	0.937561835	0.932974233	0.913139015	0.974090057	0.970499252	0.919724531
scaffold1087905.1	0.591206817	0.60042902	0.126991406	-0.271800706	0.947688365	0.798459623	0.802361599	0.923871654	0.797310341	0.89469078	0.780077735	0.860698306	0.876553494	0.96580161	0.827848655	0.963631497	0.962151223	0.797500354	0.89862684	0.841097866	0.94120052	0.959612875	0.88870078	0.959035582	0.761181466	0.759041093	0.809114436	0.924968711	0.675655994	0.981112389	0.937986894	0.810598546	0.956843968	0.880140085	0.8833315	0.975904452	0.670150341	0.792818628	0.799638698	0.885355712	0.693620426	0.934654522	0.792809935	0.815763728	0.791482233	0.76471293	0.869218383	0.870733196	0.786349568
scaffold1143983.1	0.973357327	0.97629413	0.82634695	-0.426853984	0.630492174	0.958030968	0.893130888	0.799237069	0.959826282	0.875821787	0.965843817	0.924657633	0.914809413	0.785102992	0.842557015	0.797878374	0.799304605	0.963466094	0.905686149	0.850353712	0.817196443	0.802474676	0.904965176	0.811737444	0.971172843	0.93771492	0.936702713	0.843659373	0.974286987	0.690569282	0.811130778	0.879494635	0.767983833	0.911008713	0.901043612	0.741503045	0.853920838	0.903811164	0.967396154	0.896475081	0.983261544	0.844219626	0.967486901	0.95834397	0.972817232	0.97469537	0.923039661	0.925265635	0.963995604
C427174819.1	0.952144242	0.959513244	0.727565662	-0.44951679	0.708165417	0.975750916	0.946350975	0.883357564	0.976872949	0.922990771	0.983939326	0.950212422	0.936051881	0.877372233	0.927169829	0.860159399	0.859739606	0.983218605	0.943741212	0.849867179	0.895621576	0.881585098	0.936449971	0.871217909	0.982975225	0.931102672	0.958220038	0.912221781	0.9832825	0.771197514	0.893526175	0.85120561	0.834449368	0.929601212	0.928205613	0.809119442	0.859318862	0.933822156	0.984656805	0.928873078	0.980031642	0.89817977	0.979112298	0.974366184	0.978811056	0.974186299	0.940784949	0.946182598	0.974902082
scaffold1502180.1	0.745070247	0.752434464	0.362834375	-0.375102362	0.899204439	0.877446937	0.823430632	0.890387288	0.878371995	0.932437436	0.882442001	0.943614731	0.96055079	0.942104936	0.863361112	0.972102504	0.972629453	0.882169188	0.956965673	0.92563974	0.94666947	0.956454631	0.966277981	0.971611158	0.854742666	0.877711317	0.888670341	0.95579827	0.777688312	0.949612953	0.935020753	0.938033655	0.968216746	0.96733985	0.95924078	0.969278824	0.790973405	0.85623031	0.88943255	0.942437275	0.824882333	0.968053714	0.883222652	0.90971935	0.897204401	0.871718382	0.962203787	0.956866201	0.884074444
scaffold1317637.1	0.941321082	0.946702867	0.70175925	-0.458593924	0.684977389	0.933482962	0.872752354	0.832069382	0.934305406	0.915148261	0.954236809	0.94078396	0.930208003	0.874538178	0.922467178	0.866608882	0.868433743	0.954369425	0.933243902	0.822246847	0.87895679	0.876517806	0.938873778	0.878369508	0.951014728	0.970532763	0.932001192	0.912820932	0.939161971	0.772998338	0.873760856	0.874978001	0.843172952	0.930282465	0.918074788	0.819240398	0.887824428	0.898170484	0.958232712	0.931714686	0.971284525	0.912985246	0.948666499	0.95181135	0.959922006	0.953970311	0.940904159	0.942005528	0.94872329
MSTRG.23616	0.499373833	0.509412889	0.022060956	-0.230901982	0.958023121	0.735136199	0.752855323	0.890308265	0.735599877	0.85979529	0.715257834	0.802251662	0.827911838	0.928652513	0.778723114	0.939148247	0.938081942	0.73547157	0.851439626	0.816426904	0.903435602	0.923327771	0.84431313	0.930791076	0.692403866	0.677114713	0.759301392	0.879747885	0.602418272	0.973331064	0.898327964	0.758202723	0.927878496	0.834479232	0.835057095	0.953166977	0.58310939	0.751336145	0.737242616	0.824578962	0.611301579	0.887101587	0.728671839	0.75822832	0.727651967	0.698317448	0.819254574	0.819567807	0.72814725
scaffold1433177.1	0.979839654	0.98350174	0.775089363	-0.434010117	0.631960625	0.946717325	0.884450115	0.825202775	0.946299185	0.877926172	0.969314093	0.943906257	0.92108894	0.85222637	0.889823192	0.823384378	0.823568018	0.957678726	0.914938979	0.80027391	0.869435798	0.858676408	0.919863321	0.837430262	0.958768599	0.962153978	0.913066047	0.901504143	0.959113609	0.725844779	0.868812523	0.860384305	0.819637456	0.912954863	0.912889572	0.783472892	0.925364829	0.872313318	0.962511308	0.926557826	0.992600459	0.89671778	0.957186352	0.947963088	0.961643776	0.954731494	0.928458042	0.932936099	0.944872493
scaffold1048168.1	0.81841635	0.824257222	0.448497198	-0.275638568	0.860941851	0.923239375	0.894788216	0.940549277	0.922593347	0.92646089	0.92970531	0.966686637	0.963035616	0.972421783	0.882805484	0.954117495	0.952226677	0.920129948	0.960616201	0.887652387	0.980543906	0.979969404	0.963954563	0.957966449	0.896319424	0.882138001	0.897428468	0.982884041	0.846496374	0.930349412	0.979792753	0.888938296	0.96333387	0.956867802	0.966113434	0.949512333	0.849951997	0.862240023	0.927828751	0.964825848	0.880160335	0.978911092	0.920826777	0.927682551	0.920508809	0.894672489	0.958952362	0.962557522	0.905363573
scaffold412675.1	0.956292611	0.95854753	0.87028125	-0.422575792	0.533173777	0.924580569	0.874386766	0.745407806	0.924530377	0.827322687	0.912406034	0.847251213	0.831530632	0.706984843	0.805277574	0.712520762	0.714251661	0.931412468	0.841990616	0.76509591	0.723057376	0.71157398	0.820191242	0.730144175	0.953744851	0.911690943	0.907604277	0.749630641	0.970894525	0.586681477	0.720765859	0.797143888	0.655429154	0.8282183	0.813186684	0.639342034	0.782224025	0.884971813	0.929341205	0.833555125	0.955376942	0.757095829	0.934211092	0.912406857	0.932627015	0.951895965	0.840529552	0.84761244	0.930809289
scaffold789163.1	0.789391675	0.794674325	0.429136089	-0.353706482	0.894184018	0.92174687	0.865054917	0.916959821	0.921126485	0.937139787	0.913501421	0.970942242	0.980743475	0.946675435	0.855093984	0.972576947	0.971957715	0.915099398	0.974828714	0.950132348	0.956607007	0.963154617	0.974536078	0.974607105	0.894239697	0.906158232	0.911993216	0.961259971	0.822124377	0.941726973	0.946547933	0.969064666	0.970307299	0.982934629	0.982175013	0.970939275	0.818764735	0.876218961	0.920900766	0.973038298	0.860601104	0.978866832	0.921314117	0.938273879	0.930011837	0.908926345	0.980698427	0.976675562	0.913424838
scaffold1107912.1	-0.40231807	-0.423156917	-0.309762912	0.291199698	-0.306310878	-0.456333692	-0.462033057	-0.405520266	-0.456230967	-0.435373705	-0.452489458	-0.437321641	-0.422537948	-0.40046863	-0.594891355	-0.393593794	-0.388945928	-0.455953395	-0.462716202	-0.398639984	-0.406345551	-0.388355118	-0.423413005	-0.398402042	-0.482024869	-0.439068842	-0.504982503	-0.416507109	-0.47856699	-0.341730298	-0.393048323	-0.369667503	-0.350393495	-0.425861075	-0.424173991	-0.343474051	-0.292809465	-0.519399793	-0.452326803	-0.454834197	-0.440392337	-0.383837453	-0.440051214	-0.471041501	-0.459970206	-0.463868494	-0.438239473	-0.426147139	-0.467727368
scaffold1502264.1	0.857583521	0.86917343	0.569349495	-0.389663401	0.83591362	0.958181491	0.950150697	0.922407715	0.963418797	0.965602644	0.95937255	0.945475514	0.954631995	0.90761012	0.926099788	0.925494259	0.926128612	0.966998095	0.964741696	0.921920122	0.925778011	0.916401467	0.961159487	0.930075187	0.953214697	0.874712318	0.974123556	0.928018199	0.936075766	0.869714901	0.918243285	0.865664391	0.884966315	0.955490557	0.946011984	0.874260164	0.767420124	0.961678845	0.969575448	0.924436003	0.914802549	0.912854541	0.960309539	0.971002124	0.962380392	0.951931744	0.957664662	0.959066805	0.968222898
scaffold1039827.1	0.948601272	0.948467199	0.911198367	-0.383979013	0.306390292	0.795916315	0.719480751	0.591070396	0.79380798	0.625949896	0.846342159	0.772629308	0.723524629	0.601765603	0.694514757	0.534063692	0.531663407	0.799855039	0.695039624	0.569373268	0.651910466	0.619697726	0.711242411	0.553138928	0.815790085	0.802692224	0.713225039	0.696654707	0.855219146	0.416442777	0.658804915	0.657727032	0.572529076	0.702065029	0.719338197	0.499402929	0.879013524	0.663229511	0.805191951	0.72265895	0.906281952	0.670567994	0.804440232	0.777315646	0.805222744	0.799144952	0.72925858	0.738765548	0.779678909
scaffold377970.2	0.842505857	0.848805764	0.819902689	-0.387132413	0.465054349	0.846474178	0.822488319	0.680995507	0.847795673	0.672696598	0.824066457	0.757750027	0.734221572	0.581283703	0.661301511	0.578130861	0.57566452	0.819574935	0.724896845	0.717809263	0.63621102	0.603825238	0.696198409	0.59235341	0.84555759	0.723581462	0.792668017	0.637789268	0.883856974	0.483676844	0.633348154	0.703079485	0.557088364	0.71733892	0.730869945	0.531953288	0.664526787	0.772552422	0.821735617	0.724718569	0.829428873	0.62733026	0.83206268	0.803808342	0.820418756	0.831834981	0.737793106	0.740269174	0.815496095
scaffold776470.1	-0.234720628	-0.221167873	-0.194635044	-0.258040093	-0.172361484	-0.200261617	-0.187525594	-0.190459936	-0.203367363	-0.17984623	-0.200563431	-0.196086606	-0.210293663	-0.175100319	-0.016703591	-0.189402032	-0.197020458	-0.197942501	-0.173117283	-0.202351203	-0.180162735	-0.191677411	-0.198796313	-0.19594286	-0.18429271	-0.174651811	-0.165991308	-0.174166108	-0.202015309	-0.198442689	-0.190836005	-0.197097975	-0.185517352	-0.203050005	-0.191560155	-0.184309147	-0.215886777	-0.139088703	-0.223418515	-0.202822005	-0.216628554	-0.20501576	-0.229052104	-0.172078302	-0.197448245	-0.191861758	-0.200839029	-0.213069706	-0.184977154
scaffold1285063.1	0.61542373	0.621778429	0.193964212	-0.274159134	0.950972646	0.808463639	0.7709587	0.875585997	0.809923437	0.903528473	0.797786467	0.880316223	0.912045826	0.918781857	0.786466127	0.969087506	0.970108679	0.809163752	0.913277081	0.916818678	0.915037683	0.932203247	0.918984813	0.963959515	0.773483628	0.786354567	0.831789456	0.908609538	0.677606863	0.973690972	0.902469102	0.896080658	0.953874755	0.923234952	0.911509125	0.973439167	0.675524732	0.808327349	0.816008815	0.888621514	0.713790377	0.928944291	0.81125416	0.842946684	0.822454587	0.795446426	0.909224545	0.903813817	0.81506763
scaffold325939.1	0.649355821	0.655162919	0.20356705	-0.264728733	0.907567026	0.80660838	0.801129483	0.899525248	0.806038194	0.905680898	0.813535568	0.869696065	0.885178915	0.956219909	0.849823185	0.948890023	0.948403042	0.819184279	0.901588347	0.826341464	0.940193049	0.953722688	0.908502654	0.945407944	0.779329837	0.776962078	0.819817969	0.93622808	0.700853762	0.953754103	0.938922274	0.794592256	0.945817943	0.889617151	0.886541267	0.949362454	0.713845554	0.802715724	0.821144702	0.87248188	0.739621338	0.933111185	0.810054419	0.834530236	0.812759048	0.783301716	0.878145924	0.883453925	0.809612228
scaffold1479729.1	0.824691517	0.834022219	0.797297148	-0.427245892	0.492001029	0.849671839	0.840410054	0.692288057	0.852534388	0.698966331	0.824731527	0.75002368	0.733548151	0.583820845	0.695079191	0.591727016	0.5896832	0.828116487	0.734761122	0.732618967	0.636163895	0.603260122	0.701977882	0.604183593	0.85390697	0.710677856	0.817738649	0.634787858	0.893249405	0.495902348	0.630900178	0.689271938	0.55198845	0.720758331	0.727624307	0.53298088	0.619649964	0.809001591	0.827730819	0.713853417	0.820944776	0.618121949	0.835203523	0.814362814	0.825429606	0.839526334	0.738486418	0.740210767	0.829819191
scaffold964404.1	0.655977804	0.66665974	0.237435206	-0.325942236	0.966170079	0.85343107	0.84639764	0.92812674	0.856440674	0.931435943	0.848697507	0.906512995	0.93202217	0.948126659	0.851635829	0.979025289	0.978538839	0.852765647	0.938267454	0.930134186	0.954982667	0.960303568	0.941237987	0.973512851	0.816679057	0.773677359	0.873168088	0.941329883	0.74283877	0.983148996	0.944544181	0.868017507	0.965608713	0.937410893	0.93440302	0.974667747	0.687345809	0.85831795	0.858401659	0.898955497	0.7518084	0.938374554	0.849746172	0.879296299	0.85472527	0.825243127	0.927555714	0.924721725	0.854328139
MSTRG.41189	0.613290474	0.617278662	0.175096011	-0.286777468	0.891378	0.771745037	0.719396866	0.8531708	0.769430578	0.841776557	0.769253393	0.87449704	0.886219492	0.932066107	0.762646686	0.940808778	0.940084585	0.767032078	0.879535671	0.836953712	0.920016767	0.939457383	0.888668835	0.937836403	0.730500108	0.795287741	0.760743441	0.919933987	0.635897427	0.949580786	0.912008271	0.877621303	0.963372087	0.889350033	0.894518761	0.972329931	0.749752551	0.719597133	0.776320123	0.895786013	0.701126391	0.944581448	0.771528981	0.796202634	0.781179805	0.747025336	0.883252143	0.877669166	0.757513735
MSTRG.10247	0.92433555	0.928073089	0.662141512	-0.426953035	0.683584931	0.924407581	0.859283183	0.842508313	0.921427849	0.897265259	0.932788964	0.939986188	0.921710194	0.893851125	0.905687424	0.86781183	0.868521097	0.937358569	0.928627192	0.79882388	0.884804229	0.890143004	0.924005221	0.880552925	0.936800839	0.985790932	0.90638835	0.917208803	0.911189751	0.783625656	0.883446663	0.883451024	0.857220588	0.918974511	0.914034504	0.839813344	0.90643068	0.866515965	0.941189839	0.952066116	0.956150167	0.930947988	0.936593167	0.93200861	0.943175069	0.93829035	0.929777626	0.932711785	0.92381045
scaffold1103184.1	-0.313948079	-0.293719756	-0.246516777	-0.325999262	-0.222087899	-0.270719695	-0.255841298	-0.251288657	-0.272475463	-0.244193108	-0.26775424	-0.261880759	-0.274477467	-0.226407601	-0.075290689	-0.227935884	-0.235411623	-0.269113819	-0.230482517	-0.262770971	-0.23456761	-0.251659739	-0.262733814	-0.237682649	-0.246906036	-0.243584603	-0.237745808	-0.231996705	-0.264945985	-0.258200534	-0.249276901	-0.267638685	-0.248220055	-0.263615859	-0.260225033	-0.242921875	-0.277350209	-0.214311105	-0.284621811	-0.265897182	-0.288607683	-0.268026081	-0.287973361	-0.237590496	-0.264228819	-0.263200006	-0.264071536	-0.278159277	-0.247666319
scaffold1381706.1	0.988743494	0.988493773	0.877819428	-0.410804273	0.49949156	0.902914232	0.824121748	0.720703424	0.902480619	0.797089761	0.926163636	0.878547245	0.851545014	0.735212774	0.809189591	0.715796368	0.716997376	0.913819217	0.838375758	0.733719665	0.761059672	0.745788185	0.843640171	0.733959229	0.926507504	0.933811351	0.86473807	0.801872093	0.945980175	0.594145909	0.759437632	0.812151496	0.703018148	0.843062466	0.838324619	0.661718652	0.889845836	0.821892336	0.91893891	0.856339186	0.977453001	0.800733306	0.916914496	0.899386783	0.922932372	0.925018137	0.862798475	0.86643103	0.904917115
scaffold1388182.1	0.751689809	0.762436964	0.344304576	-0.330712663	0.918149145	0.907222721	0.907414478	0.968339345	0.906838733	0.950813238	0.902040465	0.941277234	0.946481281	0.989252005	0.912992	0.972160621	0.970180533	0.907394765	0.963088773	0.890631767	0.984171351	0.989515017	0.955176863	0.971716027	0.880694826	0.844183541	0.903959746	0.977159228	0.819794419	0.963891786	0.983987715	0.857945907	0.969490456	0.944353687	0.949842211	0.970302988	0.776290976	0.885576436	0.910590658	0.944608489	0.833305304	0.971828345	0.902545763	0.915917255	0.899596373	0.8766088	0.940111678	0.945491046	0.894987268
C425356152.1	0.888469322	0.892330517	0.570136296	-0.354135246	0.801802505	0.933858018	0.88863325	0.88719863	0.935729502	0.956160324	0.96351237	0.960945757	0.965515506	0.928430894	0.91419127	0.930499382	0.931643078	0.954649987	0.963572399	0.882637669	0.942451359	0.939446501	0.982832247	0.935789808	0.931993671	0.919342847	0.933564988	0.963201128	0.893696907	0.869534703	0.93918917	0.880519453	0.918088325	0.967126662	0.955961039	0.893306845	0.865972058	0.905265957	0.958601259	0.933598996	0.938072395	0.952325779	0.948791486	0.961000328	0.956923627	0.937027502	0.966451731	0.972165319	0.950916065
C427101077.1	0.691818637	0.697675226	0.256471418	-0.272224415	0.865782817	0.825283965	0.812301582	0.916308546	0.821694473	0.862610957	0.83549369	0.900550914	0.894268402	0.974467326	0.84251898	0.926404309	0.922895367	0.821169552	0.897796953	0.80066035	0.967908154	0.974624887	0.902538991	0.924603647	0.786229792	0.791536744	0.791269163	0.961998735	0.718138438	0.933505988	0.97199969	0.806500141	0.964721214	0.886069302	0.906375008	0.954723584	0.8008805	0.760895358	0.827609305	0.907653155	0.767307925	0.957363356	0.819809027	0.830896342	0.815469224	0.779457802	0.884955262	0.890550529	0.796930396
C426715735.1	0.802499744	0.807141135	0.421970906	-0.342467476	0.858878553	0.897979708	0.856867715	0.916073513	0.897630473	0.928697055	0.909954876	0.956271319	0.956527905	0.972448463	0.891094389	0.958118771	0.95780644	0.904286993	0.954675355	0.872533356	0.971516542	0.976959109	0.964450227	0.960522878	0.877241641	0.895398341	0.88453415	0.979309751	0.824921971	0.928267938	0.968353143	0.895105466	0.967029543	0.954999235	0.957471899	0.956792568	0.850035705	0.851422221	0.91103564	0.957949509	0.867537402	0.983317618	0.901636076	0.915585193	0.907667321	0.881749703	0.956818402	0.956989221	0.89187602
scaffold1383201.1	0.709689104	0.717194774	0.275809485	-0.300741858	0.886813363	0.842401349	0.823746189	0.919222276	0.841121848	0.89370194	0.858355838	0.918823966	0.91987459	0.979923488	0.865010008	0.950412776	0.948035687	0.844504571	0.92138566	0.837762019	0.977980235	0.983625567	0.932249073	0.948421595	0.807784995	0.810875818	0.824133304	0.976593217	0.739260257	0.952011948	0.977886054	0.834058715	0.978640436	0.915767524	0.928091369	0.96701758	0.804175786	0.793893122	0.851324013	0.91792149	0.788411918	0.969222858	0.84079322	0.859012333	0.842194655	0.805964708	0.913096071	0.916444385	0.827202585
MSTRG.42133	0.833150552	0.84967618	0.584678941	-0.58469666	0.717933957	0.897730139	0.897711352	0.843939709	0.900172275	0.918860215	0.908036015	0.870828807	0.869358911	0.848215232	0.984030289	0.840356008	0.840374958	0.921642139	0.906613535	0.799256204	0.848643826	0.83963995	0.890397348	0.845361599	0.920982349	0.85692265	0.936944874	0.865450795	0.910771551	0.760699048	0.841738673	0.762145012	0.787620477	0.873890638	0.858377153	0.778609342	0.723867348	0.938482045	0.917790669	0.851626299	0.887511166	0.838162722	0.902511392	0.921435444	0.911484654	0.909912858	0.878486308	0.88070923	0.924945748
MSTRG.24011	0.893893125	0.894947389	0.683157902	-0.403462587	0.658977057	0.911687312	0.840286634	0.808068868	0.90878484	0.870445431	0.884470672	0.897705972	0.885000453	0.830583868	0.831430585	0.83597287	0.838517897	0.915856262	0.896623238	0.801330976	0.811120235	0.823665928	0.872906685	0.851586807	0.927399453	0.984402764	0.900293865	0.837893272	0.907922675	0.738494888	0.805319781	0.898186706	0.79108055	0.886150766	0.872620709	0.796615493	0.82919051	0.862502285	0.918595035	0.933550955	0.922380943	0.878166344	0.921635898	0.908313831	0.925990912	0.937499016	0.897220584	0.895916027	0.908322589
scaffold715314.1	0.972432058	0.975208282	0.788531786	-0.443307323	0.597897714	0.923048686	0.841063637	0.778585733	0.922887194	0.853106085	0.952867657	0.92910559	0.90838746	0.816159835	0.857625071	0.800981016	0.801452672	0.936234306	0.895699642	0.791196045	0.839142912	0.827273788	0.906949021	0.815010365	0.938869753	0.959789984	0.890632754	0.878093703	0.933688715	0.693281722	0.835626701	0.865687293	0.797274453	0.903094763	0.898497505	0.757236967	0.924222346	0.844741767	0.941772567	0.906211334	0.981996749	0.875269189	0.938248062	0.933327573	0.948127851	0.940098201	0.917846977	0.919840285	0.928926439
scaffold1341023.2	0.870635723	0.879538033	0.567335225	-0.411673861	0.835219076	0.952951961	0.911791408	0.91125271	0.956602936	0.937380839	0.969076243	0.981636673	0.98418037	0.92461785	0.898000731	0.93417456	0.933778577	0.953377924	0.97073687	0.934740186	0.95611784	0.944893639	0.982409574	0.937876718	0.934420583	0.894189939	0.939800954	0.964188339	0.905088533	0.88517826	0.947618408	0.923419999	0.935112054	0.980583951	0.982617825	0.912722986	0.850914918	0.907958427	0.96183584	0.95369823	0.922168455	0.953609643	0.95343231	0.966619263	0.960923364	0.937837863	0.986715656	0.984083303	0.950580102
scaffold1115489.1	0.387448977	0.394426143	-0.015315701	-0.200775631	0.891435151	0.611524181	0.564697788	0.703277076	0.61640874	0.729795043	0.616432593	0.724426638	0.774575819	0.749825761	0.584373852	0.840716604	0.841387914	0.604931779	0.750574875	0.841825847	0.774143833	0.785373058	0.778840494	0.827226051	0.556468453	0.5615298	0.645374517	0.760059913	0.443670117	0.881737265	0.752687368	0.789856029	0.848648357	0.789843609	0.779680273	0.864976318	0.494918977	0.622559539	0.616768129	0.708683835	0.493057673	0.772370324	0.611698506	0.664142391	0.632872024	0.58989208	0.77062418	0.755453281	0.624386453
C426007641.1	0.713132198	0.716512543	0.409010898	-0.29276859	0.890440768	0.871550066	0.813902544	0.841245411	0.875525343	0.887893062	0.865282635	0.906568417	0.939722893	0.829921543	0.740407972	0.91212723	0.91299139	0.860001152	0.917078294	0.988330341	0.873198068	0.869277427	0.928763708	0.909694146	0.835235548	0.787227065	0.876907512	0.86758819	0.761535357	0.887977852	0.855845691	0.94196087	0.894474358	0.947302006	0.935815365	0.89769468	0.689697744	0.850873222	0.868432911	0.87422385	0.783266589	0.877861097	0.871464205	0.896632066	0.883436175	0.860338683	0.937536756	0.930303276	0.87755568
C427334408.1	0.830112693	0.83560511	0.565030814	-0.427059427	0.800314914	0.920282878	0.839773669	0.846185372	0.921378727	0.892355836	0.909894138	0.952626958	0.959181855	0.862718853	0.818453309	0.907227841	0.907971415	0.910381659	0.943007228	0.939817045	0.885188893	0.885189361	0.94094585	0.913083211	0.904341318	0.921350137	0.910340838	0.898307874	0.855856234	0.846573447	0.869263586	0.98380118	0.893372984	0.961820691	0.955727481	0.891555316	0.813947275	0.869160917	0.919879574	0.951889598	0.881527577	0.922227969	0.921797153	0.934066285	0.935660833	0.92299822	0.967560766	0.956551874	0.916278838
MSTRG.9021	-0.273421859	-0.253466618	-0.202496763	-0.359676909	-0.212110954	-0.236502284	-0.227359695	-0.228230811	-0.239182922	-0.217261221	-0.234871657	-0.229289494	-0.243673477	-0.201556084	-0.036362765	-0.205002091	-0.212058036	-0.235818768	-0.198602066	-0.238044895	-0.211346298	-0.227450997	-0.233993047	-0.213355146	-0.209596092	-0.200710078	-0.202097844	-0.205880776	-0.226458306	-0.237240217	-0.226583937	-0.233191463	-0.229350378	-0.232860558	-0.231402369	-0.220170886	-0.244310868	-0.180545216	-0.248440748	-0.228312627	-0.249550951	-0.239861789	-0.252846919	-0.205530099	-0.22901818	-0.226545544	-0.2314833	-0.246462867	-0.214236964
scaffold1233399.1	0.509357595	0.52103889	0.596832492	-0.340656613	0.316333037	0.593931799	0.65623809	0.469389206	0.59883669	0.48131439	0.519981315	0.409121303	0.412824053	0.280836689	0.456770704	0.323835188	0.323853199	0.572881342	0.454539073	0.502261227	0.309852782	0.283056599	0.384464403	0.333082278	0.612881953	0.389447468	0.614143065	0.282459521	0.672468791	0.240377456	0.304138551	0.366687669	0.209876021	0.409543192	0.397789943	0.233907742	0.183742472	0.652094456	0.561545607	0.387799478	0.509147659	0.270254843	0.573129193	0.547022366	0.55124484	0.594430571	0.416144391	0.421741866	0.588768693
scaffold1501405.1	0.648771436	0.657245594	0.192625928	-0.270675286	0.906711645	0.805747709	0.798103796	0.90997637	0.805237315	0.885845469	0.816272166	0.883966198	0.892097287	0.971591246	0.841063345	0.949402835	0.947494588	0.810925861	0.899885577	0.822498259	0.961024539	0.971664676	0.909299827	0.945612719	0.769593065	0.772242817	0.800152984	0.955214473	0.693189371	0.963510263	0.960661624	0.804209597	0.9697355	0.891260617	0.899651435	0.965637475	0.750466701	0.774418421	0.815889229	0.888034984	0.737502932	0.950268339	0.804989154	0.826930212	0.805744058	0.769925397	0.883991916	0.887893256	0.795213822
scaffold1384341.1	-0.279945022	-0.261029182	-0.235783401	-0.319508347	-0.158605974	-0.223557844	-0.215597205	-0.202079709	-0.22532523	-0.191427688	-0.220050359	-0.207845683	-0.215111777	-0.174709946	-0.040919232	-0.168802006	-0.17552623	-0.223594274	-0.174982876	-0.196505496	-0.179960116	-0.196267192	-0.204248557	-0.179292834	-0.203963941	-0.202843517	-0.190389955	-0.179394562	-0.230693936	-0.192118728	-0.195669526	-0.207673456	-0.191655154	-0.202943637	-0.203295824	-0.18088463	-0.240617238	-0.169256253	-0.23457117	-0.212709455	-0.249217284	-0.21349214	-0.23956828	-0.188834049	-0.215371153	-0.217708572	-0.205725955	-0.220086753	-0.199378801
scaffold810520.1	0.787768727	0.7886224	0.892348535	-0.361741243	0.024940232	0.550872154	0.474442211	0.293873468	0.553645457	0.371376409	0.646227698	0.525978246	0.479843582	0.303488705	0.490413772	0.245426535	0.243818844	0.568670788	0.432458273	0.336769438	0.387315229	0.336199514	0.478591737	0.262262151	0.584920489	0.54056557	0.483346588	0.444258959	0.658608616	0.122746362	0.391298167	0.395127149	0.296869412	0.459156867	0.4715837	0.196071189	0.688775039	0.442522064	0.575942207	0.427642087	0.714504671	0.384460776	0.566553257	0.549925887	0.577735575	0.566587493	0.489437723	0.49640097	0.560085584
scaffold1336266.1	-0.344289576	-0.320617138	-0.288744529	-0.413744548	-0.20315183	-0.283884787	-0.267233987	-0.257340681	-0.283394593	-0.243874631	-0.280971791	-0.261762739	-0.273850319	-0.223789789	-0.029817616	-0.223501669	-0.231188649	-0.281097383	-0.230262787	-0.252346435	-0.23008996	-0.249488747	-0.260379021	-0.234431555	-0.263345603	-0.253148801	-0.229830988	-0.227760412	-0.272099192	-0.237588643	-0.253090722	-0.255626307	-0.237374583	-0.261235208	-0.253935273	-0.228223197	-0.303278231	-0.200780543	-0.300860874	-0.26631384	-0.31275635	-0.269472929	-0.31590478	-0.241563956	-0.27498932	-0.27472444	-0.255529756	-0.280147004	-0.256372991
scaffold1355957.1	-0.311121153	-0.290501785	-0.25467829	-0.359419577	-0.19209938	-0.25273435	-0.240724524	-0.23263591	-0.25462497	-0.221643988	-0.250861977	-0.239405384	-0.250687933	-0.203986984	-0.038297661	-0.200878428	-0.208546831	-0.252581384	-0.204928247	-0.232620735	-0.210467731	-0.229557745	-0.238502903	-0.211595828	-0.230955596	-0.229376141	-0.214331674	-0.209238521	-0.252408111	-0.227053482	-0.22935191	-0.241463764	-0.226007258	-0.238225247	-0.235400512	-0.214037005	-0.273780445	-0.188368133	-0.267833357	-0.244405593	-0.280398585	-0.248555371	-0.2765709	-0.216116147	-0.245738867	-0.245908941	-0.238423474	-0.25572462	-0.227149137
scaffold1353392.1	0.838136416	0.834454552	0.983498275	-0.368213371	0.068252838	0.630408225	0.544934376	0.336461451	0.631937734	0.476149283	0.654642141	0.539203177	0.507918112	0.315021804	0.510809912	0.312905327	0.317254292	0.652700277	0.495460836	0.406308598	0.345938809	0.324335194	0.497008785	0.337911036	0.693548191	0.695275359	0.607180809	0.403546217	0.767175981	0.146775829	0.344877006	0.50137008	0.26642876	0.502566435	0.480078052	0.220558231	0.627732203	0.576336545	0.653939001	0.507307913	0.772906871	0.405147998	0.656969055	0.621566138	0.663240538	0.692846999	0.527793474	0.532492402	0.654918679
scaffold1216054.1	-0.272807481	-0.255117343	-0.213979115	-0.293587847	-0.192348035	-0.231157375	-0.219969251	-0.215396196	-0.233488796	-0.208439298	-0.228679017	-0.224682486	-0.235644214	-0.192736136	-0.060316114	-0.193186356	-0.200035022	-0.230568359	-0.194076701	-0.225441529	-0.200093413	-0.21624426	-0.225045391	-0.201966435	-0.208978157	-0.208826994	-0.203709345	-0.198274611	-0.229856717	-0.221813384	-0.213083564	-0.233543752	-0.217202022	-0.225195809	-0.224419417	-0.210098502	-0.241011794	-0.183568423	-0.242926084	-0.228251305	-0.248702247	-0.232178733	-0.244872504	-0.20155667	-0.225402197	-0.225169065	-0.227308662	-0.23883044	-0.209826475
scaffold459475.1	-0.207027839	-0.196302495	-0.159790915	-0.227417208	-0.142403267	-0.166917186	-0.169731841	-0.164128279	-0.165289549	-0.149966118	-0.168011998	-0.16377733	-0.178315998	-0.131283614	-0.044551278	-0.138349598	-0.144297661	-0.163173405	-0.146948917	-0.178828658	-0.136908925	-0.163322271	-0.16601607	-0.146265504	-0.151306571	-0.150381101	-0.164933561	-0.144806152	-0.149536673	-0.181838257	-0.152348218	-0.180979175	-0.170142888	-0.168113123	-0.166329151	-0.157296043	-0.178966019	-0.146486075	-0.181714317	-0.176915713	-0.19035763	-0.178106812	-0.202040421	-0.136759686	-0.162434917	-0.159730227	-0.166696227	-0.180839295	-0.140562235
scaffold1341351.1	-0.277470074	-0.261029709	-0.218114802	-0.299674385	-0.196274089	-0.230467022	-0.222177032	-0.219640426	-0.232450214	-0.208397884	-0.230375407	-0.225592819	-0.240041956	-0.191261347	-0.049885522	-0.190634465	-0.198160528	-0.229186685	-0.195740282	-0.231425897	-0.198803916	-0.21998564	-0.227208266	-0.199599709	-0.20938559	-0.207539488	-0.207014189	-0.198858851	-0.224994107	-0.228276994	-0.216319717	-0.23754861	-0.222462572	-0.228720201	-0.225603323	-0.212204525	-0.243941879	-0.183980192	-0.246991269	-0.232780722	-0.253540963	-0.236869448	-0.255687797	-0.198059585	-0.225587811	-0.223877374	-0.229372706	-0.243376136	-0.205912568
scaffold1154762.1	-0.295781089	-0.277650519	-0.232341925	-0.318233287	-0.209682333	-0.248082549	-0.236481223	-0.23447235	-0.2510066	-0.22496829	-0.247219252	-0.242256425	-0.256185828	-0.207682959	-0.051051334	-0.207688505	-0.215351779	-0.247769625	-0.20936741	-0.245410091	-0.215772849	-0.234867474	-0.243760793	-0.217063156	-0.225540204	-0.22429312	-0.218746496	-0.213939024	-0.245950611	-0.239691368	-0.23291159	-0.251927937	-0.236453836	-0.244882803	-0.241772179	-0.225589262	-0.261084225	-0.194267853	-0.263832339	-0.247396738	-0.270369289	-0.252212892	-0.270580447	-0.216200806	-0.243198145	-0.241751909	-0.246079457	-0.25971756	-0.224506929
MSTRG.8692	-0.268369584	-0.249329843	-0.222326561	-0.325976776	-0.168977982	-0.210878283	-0.188154434	-0.183027598	-0.212839642	-0.187991946	-0.215498466	-0.208687012	-0.223805585	-0.161686867	-0.016793547	-0.165348838	-0.172670442	-0.21182378	-0.175387721	-0.216520062	-0.173783019	-0.1923859	-0.212641687	-0.173926854	-0.191054909	-0.197897022	-0.181696582	-0.176514218	-0.200675466	-0.197171678	-0.190695601	-0.230278854	-0.199448028	-0.214439903	-0.209072951	-0.187778663	-0.239522533	-0.157390323	-0.226623023	-0.207001271	-0.240678662	-0.214376236	-0.233822564	-0.184802004	-0.211664583	-0.21026611	-0.212866265	-0.227152792	-0.192774062
MSTRG.41099	0.613405927	0.615568738	0.228023608	-0.281015668	0.836565303	0.747293659	0.663692798	0.780646929	0.746089229	0.812059009	0.73874737	0.850207073	0.867615326	0.86449845	0.713731227	0.906779427	0.908324655	0.744398183	0.853061805	0.837549332	0.852612055	0.876979765	0.863261221	0.90666136	0.716379779	0.819381201	0.751916043	0.863530282	0.624334403	0.897745981	0.837477871	0.912192835	0.913383909	0.876688363	0.869918495	0.927537603	0.725665508	0.705412237	0.755557488	0.882750247	0.693812469	0.906852591	0.753746003	0.779844412	0.772282598	0.746248742	0.87289324	0.859566763	0.744225417
MSTRG.16160	-0.186910871	-0.188475878	-0.159502358	0.800938866	-0.144414837	-0.19858417	-0.196361837	-0.172083391	-0.196807017	-0.186077396	-0.196404697	-0.183119655	-0.175599402	-0.168913406	-0.273195071	-0.135166382	-0.136385466	-0.203062515	-0.191598706	-0.149239714	-0.169996771	-0.164263568	-0.178488734	-0.13420635	-0.203474104	-0.181870237	-0.205312197	-0.167463712	-0.212996427	-0.100074143	-0.164432486	-0.169805236	-0.158736727	-0.174959048	-0.179594177	-0.157700666	-0.174355127	-0.210439258	-0.190261721	-0.138963332	-0.186741213	-0.167141926	-0.194025628	-0.202307109	-0.195648045	-0.197575167	-0.183356734	-0.177551841	-0.201958483
C426512507.1	-0.247088387	-0.250861019	-0.207203783	0.816572863	-0.188043904	-0.261759775	-0.254987591	-0.226137384	-0.260721828	-0.246104333	-0.258203185	-0.245447215	-0.23740828	-0.224153497	-0.335674166	-0.19100053	-0.192301301	-0.266600624	-0.254480769	-0.208022209	-0.225298149	-0.218957017	-0.239153146	-0.190424143	-0.269111618	-0.24853776	-0.269016036	-0.223566265	-0.27929033	-0.146707585	-0.218266365	-0.231875872	-0.212288315	-0.237158551	-0.240629281	-0.209795472	-0.225482819	-0.274908391	-0.254536895	-0.20616375	-0.250377702	-0.225737222	-0.257955925	-0.266324231	-0.260622585	-0.263187936	-0.246838406	-0.23992804	-0.266338941
scaffold130082.1	-0.242865586	-0.24841974	-0.206966487	0.862401456	-0.18253999	-0.260128778	-0.258177159	-0.222026524	-0.259059785	-0.245112991	-0.256934706	-0.240278414	-0.231631511	-0.217002083	-0.352217103	-0.185932919	-0.186875679	-0.26548598	-0.253141143	-0.204483631	-0.218892833	-0.210845864	-0.234447045	-0.186672391	-0.270434679	-0.243359041	-0.277879196	-0.219516286	-0.279793718	-0.141276056	-0.210859287	-0.221414284	-0.201583137	-0.232002198	-0.234834123	-0.19837159	-0.210273772	-0.282599171	-0.252089428	-0.197245927	-0.247517672	-0.215141568	-0.253561511	-0.266973022	-0.259336264	-0.262953919	-0.242138362	-0.234342096	-0.267232481
scaffold887320.1	-0.348943564	-0.373997906	-0.291772845	0.982879225	-0.262067717	-0.376411398	-0.377011164	-0.328400312	-0.378823145	-0.36135304	-0.380266451	-0.363773296	-0.349681526	-0.333004999	-0.513694967	-0.301450132	-0.300472185	-0.386030351	-0.378638222	-0.309146031	-0.334072885	-0.323473597	-0.353326647	-0.302571074	-0.397966514	-0.374707979	-0.408627614	-0.350668053	-0.402977509	-0.260198208	-0.321994292	-0.340202031	-0.31529575	-0.351390322	-0.353750142	-0.306753654	-0.338905555	-0.398175614	-0.376214813	-0.324823871	-0.371036733	-0.333762779	-0.369915655	-0.393070609	-0.383644285	-0.386811618	-0.364764168	-0.35357842	-0.391092458
[truncated: 69 more columns]
