# Supplementary material for: Phenylpropane biosynthesis and alkaloid metabolism pathways involved in resistance of Amorphophallus spp. against soft rot disease
Source: Front Plant Sci. 2024 Feb 20;15:1334996. doi: 10.3389/fpls.2024.1334996 (PMC10912172; doi:10.3389/fpls.2024.1334996)
Supplement: Supplementary file 11 [file Table_7.xlsx]

## Sheet: metabolites.expression
Table S7 Annotated information on DAMs in phenylpropanoid biosynthesis pathway
Compound_ID	MS2_name	rtmin	mz	KJ0-1	KJ0-2	KJ0-3	KJ24-1	KJ24-2	KJ24-3	KJ48-1	KJ48-2	KJ48-3	MJ0-1	MJ0-2	MJ0-3	MJ24-1	MJ24-2	MJ24-3	MJ48-1	MJ48-2	MJ48-3
M395T179_1_POS	syringin	2.985	395.132	1.33425e+06	1.8788e+07	1.52051e+06	3.1024e+07	5.48554e+07	8.77034e+07	1.19473e+08	1.02777e+08	2.8518e+08	1.92004e+07	2.05907e+07	3.45692e+07	2.15184e+08	3.56681e+08	5.56142e+08	7.50903e+07	4.91693e+08	7.04128e+08
M163T282_NEG	p-coumaric acid	4.697	163.04	1.08853e+07	1.64492e+07	1.84503e+07	1.04758e+07	8.58272e+06	9.37114e+06	1.3103e+07	7.93424e+06	1.06229e+07	6.90651e+06	1.10628e+07	1.18367e+07	1.78688e+07	1.21857e+07	1.35146e+07	2.63892e+07	8.16893e+06	1.26477e+07
M193T177_NEG	Ferulic acid	2.955	193.051	1.3337e+07	2.54395e+07	2.37453e+07	2.67705e+07	2.05836e+07	3.12553e+07	6.85809e+07	4.34871e+07	1.14468e+08	1.99365e+07	1.86885e+08	2.15026e+08	2.44683e+08	2.36824e+08	3.2328e+08	4.73544e+08	2.98082e+08	2.10927e+08
M149T322_1_NEG	P-coumaryl alcohol	5.367	149.046	1.40445e+09	1.46675e+09	2.05277e+09	2.43634e+08	1.85305e+08	3.08944e+08	2.3022e+08	1.27451e+08	2.79923e+08	9.75756e+07	3.32305e+08	4.94464e+08	5.51468e+08	4.56999e+08	9.1718e+08	2.23636e+09	1.94152e+08	4.24489e+08
M223T346_NEG	Sinapic acid	5.766	223.062	9.69925e+06	3.22382e+07	2.46617e+07	3.88604e+06	7.41914e+06	5.72062e+06	4.44772e+06	3.75788e+06	5.24639e+06	6.42106e+06	5.57012e+06	7.37505e+06	1.45866e+07	6.35306e+06	9.34251e+06	1.69836e+07	4.03293e+06	7.80053e+06
M209T352_1_NEG	Sinapyl alcohol	5.871	209.067	1.73196e+08	4.86583e+08	3.63167e+08	1.1255e+08	9.73614e+07	8.9598e+07	1.24277e+08	6.75564e+07	1.09884e+08	6.01715e+07	7.10831e+07	1.88644e+08	2.04745e+08	1.03872e+08	1.56218e+08	2.95712e+08	5.3357e+07	1.03374e+08

## Sheet: Sheet1
Table S7 Annotated information on DEGs in phenylpropanoid biosynthesis pathway
Gene ID	KJ0-1	KJ0-2	KJ0-3	KJ24-1	KJ24-2	KJ24-4	KJ48-1	KJ48-2	KJ48-3	MJ0-1	MJ0-2	MJ0-3	MJ24-1	MJ24-2	MJ24-3	MJ48-1	MJ48-2	MJ48-3	Symbol
C426494589.1	7.99	4.5	6.52	161.83	79.76	182.61	237.93	248.63	334.92	1.37	1.26	0.86	417.99	355.43	420.76	296.26	86.84	149.33	PAL
C426622369.1	15.38	6.25	2.26	101.06	116.75	91.22	216.59	299.91	345.71	4.27	4.39	4.78	141.27	30.48	32.83	34.17	13.39	27.21	4CL1
C427243820.1	137.05	115.31	106.59	683.14	490.08	431.11	612.08	826.19	824.2	31.74	100.43	11.64	543.55	195.21	209.5	206.73	97.81	222.34	CYP73A16
C427344540.1	14.95	24.84	19.34	291.89	133.35	157.08	288.99	278.5	308.05	0	0.44	1.8	512.26	73.52	159.47	236.74	99.83	409.76	CYP73A12
MSTRG.42473	23.09	13.19	8.13	172.58	135.95	175.16	379.99	433.67	528.7	36.82	7.76	20.94	574.69	143.62	220.68	144.11	64.49	155.51	4CL2
scaffold1235466.1	17.07	24.41	22.16	16.87	20.95	17.05	36.95	88.06	80.66	0	0	0	38.5	14.27	17.78	17.6	0	6.77	CYP84A1
scaffold1317237.1	13.46	16.64	11.05	134.46	101.86	101.56	147.93	241.34	183.31	0.31	1.14	0	140.14	18.93	24.61	48.61	12.35	101.89	CYP73A16
scaffold234563.2	158.25	264.44	282.72	188.87	199.29	154.06	463.59	645.66	821.92	15.08	19.02	8.05	480.42	155.9	215.38	205.12	31.14	135.88	CYP84A1
scaffold334841.1	115.31	92.51	60.13	195.75	144.17	103.42	157.33	346.36	243.64	4.36	41.99	2.2	158.35	83.7	53.55	33.38	14.89	67.42	PAL3
scaffold487945.1	4.52	5.49	9.76	3.01	45.69	9.45	16.25	37.98	35.22	1.31	4.85	0	22.48	18.77	12.36	13.06	5.39	10.11	PAL1
